# Supplementary material
Source: publisher site journal article supplement (https://www.spandidos-publications.com/6490/downloadSupplementary)
Supplement: Supplementary file 1 [file downloadSupplementary]

## Sheet: protein2domain
Table SXI. Domain
Protein ID	Scource	ID	Definition
P02795	interpro	IPR000006	Metallothionein, vertebrate
P02795	interpro	IPR017854	Metallothionein domain superfamily
P02795	interpro	IPR003019	Metallothionein
P02795	interpro	IPR018064	Metallothionein, vertebrate, metal binding site
P02795	interpro	IPR023587	Metallothionein domain superfamily, vertebrate
P52926	interpro	IPR017956	AT hook, DNA-binding motif
P52926	interpro	IPR000637	HMG-I/HMG-Y, DNA-binding, conserved site
P52926	interpro	IPR000116	High mobility group protein HMGA
P05121	interpro	IPR023795	Serpin, conserved site
P05121	interpro	IPR000215	Serpin family
P05121	CDD	cd02051	PAI-1_nexin-1
P05121	interpro	IPR023796	Serpin domain
P05121	interpro	IPR036186	Serpin superfamily
O15075	interpro	IPR000719	Protein kinase domain
O15075	interpro	IPR036572	Doublecortin domain superfamily
O15075	interpro	IPR003533	Doublecortin domain
O15075	CDD	cd14183	STKc_DCKL1
O15075	interpro	IPR017441	Protein kinase, ATP binding site
O15075	interpro	IPR011009	Protein kinase-like domain superfamily
O15075	interpro	IPR008271	Serine/threonine-protein kinase, active site
P04732	interpro	IPR023587	Metallothionein domain superfamily, vertebrate
P04732	interpro	IPR003019	Metallothionein
P04732	interpro	IPR017854	Metallothionein domain superfamily
P04732	interpro	IPR000006	Metallothionein, vertebrate
P04732	interpro	IPR018064	Metallothionein, vertebrate, metal binding site
Q01628	interpro	IPR007593	CD225/Dispanin family
P52566	interpro	IPR014756	Immunoglobulin E-set
P52566	interpro	IPR000406	Rho protein GDP-dissociation inhibitor
P52566	interpro	IPR024792	Rho GDP-dissociation inhibitor domain superfamily
Q8IVF2	CDD	cd00992	PDZ_signaling
Q8IVF2	interpro	IPR001478	PDZ domain
Q8IVF2	interpro	IPR036034	PDZ superfamily
Q9BXT2	interpro	IPR008370	Voltage-dependent calcium channel, gamma-6 subunit
Q9BXT2	interpro	IPR008368	Voltage-dependent calcium channel, gamma subunit
Q9BXT2	interpro	IPR004031	PMP-22/EMP/MP20/Claudin superfamily
O75326	interpro	IPR015943	WD40/YVTN repeat-like-containing domain superfamily
O75326	interpro	IPR013783	Immunoglobulin-like fold
O75326	interpro	IPR007110	Immunoglobulin-like domain
O75326	interpro	IPR002165	Plexin repeat
O75326	interpro	IPR016201	PSI domain
O75326	interpro	IPR001627	Sema domain
O75326	interpro	IPR036179	Immunoglobulin-like domain superfamily
O75326	CDD	cd11243	Sema_7A
O75326	interpro	IPR027231	Semaphorin
O75326	interpro	IPR036352	Sema domain superfamily
Q9NS25	interpro	IPR010007	SPAN-X family
Q9Y653	interpro	IPR000203	GPS motif
Q9Y653	interpro	IPR000832	GPCR, family 2, secretin-like
Q9Y653	interpro	IPR003910	GPCR, family 2, orphan receptor, GPR1/GPR3/GPR5
Q9Y653	interpro	IPR017981	GPCR, family 2-like
Q96K17	interpro	IPR002715	Nascent polypeptide-associated complex NAC domain
Q96K17	interpro	IPR038187	NAC A/B domain superfamily
P02679	interpro	IPR012290	Fibrinogen, alpha/beta/gamma chain, coiled coil domain
P02679	interpro	IPR002181	Fibrinogen, alpha/beta/gamma chain, C-terminal globular domain
P02679	interpro	IPR014715	Fibrinogen, alpha/beta/gamma chain, C-terminal globular, subdomain 2
P02679	interpro	IPR014716	Fibrinogen, alpha/beta/gamma chain, C-terminal globular, subdomain 1
P02679	interpro	IPR020837	Fibrinogen, conserved site
P02679	interpro	IPR037581	Fibrinogen gamma chain
P02679	interpro	IPR036056	Fibrinogen-like, C-terminal
Q14697	interpro	IPR011013	Galactose mutarotase-like domain superfamily
Q14697	interpro	IPR013780	Glycosyl hydrolase, all-beta
Q14697	CDD	cd06603	GH31_GANC_GANAB_alpha
Q14697	interpro	IPR025887	Glycoside hydrolase family 31, N-terminal domain
Q14697	CDD	cd14752	GH31_N
Q14697	interpro	IPR030459	Glycosyl hydrolases family 31, conserved site
Q14697	interpro	IPR000322	Glycoside hydrolase family 31
Q14697	interpro	IPR017853	Glycoside hydrolase superfamily
Q14697	interpro	IPR030458	Glycosyl hydrolases family 31, active site
P46821	interpro	IPR027321	Microtubule-associated protein 1B
P46821	interpro	IPR000102	Neuraxin/MAP1B repeat
P46821	interpro	IPR026074	Microtubule associated protein 1
Q14061	interpro	IPR007745	Cytochrome c oxidase copper chaperone
Q14061	interpro	IPR009069	Cysteine alpha-hairpin motif superfamily
Q14061	ProSiteProfiles	PS51808	Coiled coil-helix-coiled coil-helix (CHCH) domain profile.
P27701	interpro	IPR000301	Tetraspanin
P27701	interpro	IPR008952	Tetraspanin, EC2 domain superfamily
P27701	interpro	IPR018503	Tetraspanin, conserved site
P27701	interpro	IPR018499	Tetraspanin/Peripherin
P27701	CDD	cd03160	CD37_CD82_like_LEL
P21926	interpro	IPR000301	Tetraspanin
P21926	interpro	IPR008952	Tetraspanin, EC2 domain superfamily
P21926	interpro	IPR018499	Tetraspanin/Peripherin
P21926	CDD	cd03152	CD9_LEL
P21926	interpro	IPR018503	Tetraspanin, conserved site
P02751	interpro	IPR003961	Fibronectin type III
P02751	interpro	IPR000083	Fibronectin, type I
P02751	interpro	IPR013783	Immunoglobulin-like fold
P02751	interpro	IPR036116	Fibronectin type III superfamily
P02751	interpro	IPR000562	Fibronectin type II domain
P02751	interpro	IPR036943	Fibronectin type II domain superfamily
P02751	interpro	IPR013806	Kringle-like fold
P02751	PRINTS	PR00013	Fibronectin type II repeat signature
Q96S97	interpro	IPR008253	Marvel domain
Q14533	interpro	IPR039008	Intermediate filament, rod domain
Q14533	interpro	IPR018039	Intermediate filament protein, conserved site
Q14533	interpro	IPR032444	Keratin type II head
Q14533	interpro	IPR003054	Keratin, type II
Q14533	interpro	IPR001664	Intermediate filament protein
O14495	interpro	IPR036938	Phosphatidic acid phosphatase type 2/haloperoxidase superfamily
O14495	interpro	IPR000326	Phosphatidic acid phosphatase type 2/haloperoxidase
O14495	interpro	IPR028675	Lipid phosphate phosphohydrolase 3
O14495	CDD	cd03384	PAP2_wunen
P04179	interpro	IPR019831	Manganese/iron superoxide dismutase, N-terminal
P04179	interpro	IPR019832	Manganese/iron superoxide dismutase, C-terminal
P04179	interpro	IPR001189	Manganese/iron superoxide dismutase
P04179	interpro	IPR036314	Manganese/iron superoxide dismutase, C-terminal domain superfamily
P04179	interpro	IPR036324	Manganese/iron superoxide dismutase, N-terminal domain superfamily
P04179	interpro	IPR019833	Manganese/iron superoxide dismutase, binding site
O95832	PRINTS	PR01077	Claudin family signature
O95832	interpro	IPR003548	Claudin-1
O95832	interpro	IPR006187	Claudin
O95832	interpro	IPR004031	PMP-22/EMP/MP20/Claudin superfamily
O95832	interpro	IPR017974	Claudin, conserved site
P30530	interpro	IPR017441	Protein kinase, ATP binding site
P30530	interpro	IPR007110	Immunoglobulin-like domain
P30530	interpro	IPR020635	Tyrosine-protein kinase, catalytic domain
P30530	interpro	IPR000719	Protein kinase domain
P30530	interpro	IPR003961	Fibronectin type III
P30530	interpro	IPR003599	Immunoglobulin subtype
P30530	interpro	IPR001245	Serine-threonine/tyrosine-protein kinase, catalytic domain
P30530	interpro	IPR013783	Immunoglobulin-like fold
P30530	CDD	cd05075	PTKc_Axl
P30530	Pfam	PF13927	Immunoglobulin domain
P30530	CDD	cd05749	Ig2_Axl_Tyro3_like
P30530	interpro	IPR011009	Protein kinase-like domain superfamily
P30530	interpro	IPR036179	Immunoglobulin-like domain superfamily
P30530	interpro	IPR008266	Tyrosine-protein kinase, active site
P30530	CDD	cd00096	Ig
P30530	interpro	IPR036116	Fibronectin type III superfamily
Q13885	interpro	IPR008280	Tubulin/FtsZ, C-terminal
Q13885	interpro	IPR036525	Tubulin/FtsZ, GTPase domain superfamily
Q13885	interpro	IPR023123	Tubulin, C-terminal
Q13885	interpro	IPR002453	Beta tubulin
Q13885	interpro	IPR013838	Beta tubulin, autoregulation binding site
Q13885	interpro	IPR018316	Tubulin/FtsZ, 2-layer sandwich domain
Q13885	interpro	IPR000217	Tubulin
Q13885	interpro	IPR017975	Tubulin, conserved site
Q13885	CDD	cd02187	beta_tubulin
Q13885	interpro	IPR003008	Tubulin/FtsZ, GTPase domain
Q13885	interpro	IPR037103	Tubulin/FtsZ, C-terminal domain superfamily
Q99942	CDD	cd16743	RING-HC_RNF5
Q99942	interpro	IPR001841	Zinc finger, RING-type
Q99942	interpro	IPR017907	Zinc finger, RING-type, conserved site
Q99942	interpro	IPR013083	Zinc finger, RING/FYVE/PHD-type
Q99942	Pfam	PF13920	Zinc finger, C3HC4 type (RING finger)
Q96HE7	interpro	IPR037192	ERO1-like superfamily
Q96HE7	interpro	IPR007266	Endoplasmic reticulum oxidoreductin 1
Q9NXK6	interpro	IPR004254	AdipoR/Haemolysin-III-related
P11234	interpro	IPR005225	Small GTP-binding protein domain
P11234	interpro	IPR027417	P-loop containing nucleoside triphosphate hydrolase
P11234	PRINTS	PR00449	Transforming protein P21 ras signature
P11234	CDD	cd04139	RalA_RalB
P11234	interpro	IPR001806	Small GTPase superfamily
P11234	interpro	IPR028412	Ras-related protein Ral
P11234	interpro	IPR020849	Small GTPase superfamily, Ras-type
P01584	interpro	IPR020877	Interleukin-1 conserved site
P01584	interpro	IPR003502	Interleukin-1 propeptide
P01584	CDD	cd00100	IL1
P01584	interpro	IPR000975	Interleukin-1 family
P01584	interpro	IPR003296	Interleukin-1 beta
P01584	PRINTS	PR01359	Interleukin-1 beta precursor signature
P01584	interpro	IPR008996	Cytokine IL1/FGF
P01584	PRINTS	PR00262	IL1/HBGF family signature
P01584	PRINTS	PR01357	Interleukin-1 alpha/beta precursor family signature
Q9C002	interpro	IPR010530	NADH-ubiquinone reductase complex 1 MLRQ subunit
Q8NDC0	interpro	IPR031653	MAPK-interacting and spindle-stabilising protein
P23921	CDD	cd01679	RNR_I
P23921	interpro	IPR005144	ATP-cone domain
P23921	interpro	IPR000788	Ribonucleotide reductase large subunit, C-terminal
P23921	interpro	IPR008926	Ribonucleotide reductase R1 subunit, N-terminal
P23921	interpro	IPR013509	Ribonucleotide reductase large subunit, N-terminal
P23921	interpro	IPR013346	Ribonucleotide reductase, class I , alpha subunit
Q6P9B6	interpro	IPR006571	TLDc domain
Q9BXN6	interpro	IPR010007	SPAN-X family
Q6JBY9	interpro	IPR029341	FAM21/CAPZIP domain
Q6JBY9	interpro	IPR007850	RCSD
Q01432	interpro	IPR006329	AMP deaminase
Q01432	interpro	IPR006650	Adenosine/AMP deaminase active site
Q01432	interpro	IPR029771	AMP deaminase 3
Q01432	interpro	IPR032466	Metal-dependent hydrolase
Q01432	interpro	IPR001365	Adenosine/AMP deaminase domain
P28288	CDD	cd03223	ABCD_peroxisomal_ALDP
P28288	interpro	IPR017871	ABC transporter, conserved site
P28288	interpro	IPR003593	AAA+ ATPase domain
P28288	interpro	IPR011527	ABC transporter type 1, transmembrane domain
P28288	interpro	IPR003439	ABC transporter-like
P28288	interpro	IPR005283	Peroxysomal long chain fatty acyl transporter
P28288	interpro	IPR027417	P-loop containing nucleoside triphosphate hydrolase
P28288	interpro	IPR031241	ATP-binding cassette sub-family D member 3
P28288	interpro	IPR036640	ABC transporter type 1, transmembrane domain superfamily
O75976	interpro	IPR000834	Peptidase M14, carboxypeptidase A
O75976	interpro	IPR015567	Peptidase M14B, caboxypeptidase D
O75976	interpro	IPR034224	Carboxypeptidase D, carboxypeptidase-like domain 2
O75976	interpro	IPR008969	Carboxypeptidase-like, regulatory domain superfamily
O75976	CDD	cd11308	Peptidase_M14NE-CP-C_like
O75976	Pfam	PF13620	Carboxypeptidase regulatory-like domain
O75976	interpro	IPR033848	Carboxypeptidase D, carboxypeptidase-like domain 3
O75976	interpro	IPR034241	Carboxypeptidase D, carboxypeptidase-like domain 1
P07858	interpro	IPR000668	Peptidase C1A, papain C-terminal
P07858	interpro	IPR025661	Cysteine peptidase, asparagine active site
P07858	interpro	IPR012599	Peptidase C1A, propeptide
P07858	interpro	IPR013128	Peptidase C1A
P07858	interpro	IPR025660	Cysteine peptidase, histidine active site
P07858	interpro	IPR000169	Cysteine peptidase, cysteine active site
P07858	CDD	cd02620	Peptidase_C1A_CathepsinB
P07858	interpro	IPR038765	Papain-like cysteine peptidase superfamily
Q9Y5U9	interpro	IPR013880	Yos1-like
Q9Y673	interpro	IPR035518	Dolichyl-phosphate beta-glucosyltransferase
Q9Y673	interpro	IPR029044	Nucleotide-diphospho-sugar transferases
Q9Y673	interpro	IPR001173	Glycosyltransferase 2-like
Q07954	interpro	IPR036055	LDL receptor-like superfamily
Q07954	interpro	IPR002172	Low-density lipoprotein (LDL) receptor class A repeat
Q07954	interpro	IPR000033	LDLR class B repeat
Q07954	interpro	IPR000742	EGF-like domain
Q07954	Pfam	PF14670	Coagulation Factor Xa inhibitory site
Q07954	interpro	IPR013032	EGF-like, conserved site
Q07954	CDD	cd00054	EGF_CA
Q07954	interpro	IPR023415	Low-density lipoprotein (LDL) receptor class A, conserved site
Q07954	interpro	IPR011042	Six-bladed beta-propeller, TolB-like
Q07954	interpro	IPR000152	EGF-type aspartate/asparagine hydroxylation site
Q07954	interpro	IPR009030	Growth factor receptor cysteine-rich domain superfamily
Q07954	interpro	IPR001881	EGF-like calcium-binding domain
Q07954	interpro	IPR018097	EGF-like calcium-binding, conserved site
Q07954	interpro	IPR026823	Complement Clr-like EGF domain
Q07954	interpro	IPR032485	Domain of unknown function DUF5050
Q6PI78	interpro	IPR019537	Transmembrane protein 65
P80297	interpro	IPR017854	Metallothionein domain superfamily
P80297	interpro	IPR003019	Metallothionein
P80297	interpro	IPR023587	Metallothionein domain superfamily, vertebrate
P80297	interpro	IPR000006	Metallothionein, vertebrate
P80297	interpro	IPR018064	Metallothionein, vertebrate, metal binding site
O60711	interpro	IPR017305	Leupaxin/Paxillin/TGFB1I1
O60711	interpro	IPR001781	Zinc finger, LIM-type
O60711	interpro	IPR034961	Leupaxin
O60711	CDD	cd09410	LIM3_Leupaxin
O60711	CDD	cd09408	LIM2_Leupaxin
O60711	CDD	cd09339	LIM4_Paxillin_like
O60711	CDD	cd09406	LIM1_Leupaxin
Q9UI42	interpro	IPR036990	Metallocarboxypeptidase-like, propeptide
Q9UI42	interpro	IPR000834	Peptidase M14, carboxypeptidase A
Q9UI42	interpro	IPR003146	Carboxypeptidase, activation peptide
Q9UI42	interpro	IPR034248	Carboxypeptidase A, carboxypeptidase domain
Q14116	interpro	IPR015529	Interleukin-18
Q14116	interpro	IPR000975	Interleukin-1 family
Q14116	interpro	IPR008996	Cytokine IL1/FGF
Q6PCE3	interpro	IPR005845	Alpha-D-phosphohexomutase, alpha/beta/alpha domain II
Q6PCE3	interpro	IPR016055	Alpha-D-phosphohexomutase, alpha/beta/alpha I/II/III
Q6PCE3	interpro	IPR036900	Alpha-D-phosphohexomutase, C-terminal domain superfamily
Q6PCE3	CDD	cd05799	PGM2
Q6PCE3	interpro	IPR005846	Alpha-D-phosphohexomutase, alpha/beta/alpha domain III
Q6PCE3	interpro	IPR005844	Alpha-D-phosphohexomutase, alpha/beta/alpha domain I
Q6PCE3	interpro	IPR005843	Alpha-D-phosphohexomutase, C-terminal
Q6UXH1	interpro	IPR013032	EGF-like, conserved site
Q6UXH1	interpro	IPR006212	Furin-like repeat
Q6UXH1	interpro	IPR001881	EGF-like calcium-binding domain
Q6UXH1	interpro	IPR000742	EGF-like domain
Q6UXH1	interpro	IPR000152	EGF-type aspartate/asparagine hydroxylation site
Q6UXH1	interpro	IPR009030	Growth factor receptor cysteine-rich domain superfamily
Q6UXH1	interpro	IPR018097	EGF-like calcium-binding, conserved site
Q6UXH1	interpro	IPR002049	Laminin EGF domain
P09382	interpro	IPR001079	Galectin, carbohydrate recognition domain
P09382	interpro	IPR013320	Concanavalin A-like lectin/glucanase domain superfamily
O15321	interpro	IPR004240	Nonaspanin (TM9SF)
P17301	interpro	IPR036465	von Willebrand factor A-like domain superfamily
P17301	interpro	IPR013519	Integrin alpha beta-propellor
P17301	PRINTS	PR00453	Von Willebrand factor type A domain signature
P17301	interpro	IPR002035	von Willebrand factor, type A
P17301	interpro	IPR013517	FG-GAP repeat
P17301	CDD	cd01469	vWA_integrins_alpha_subunit
P17301	interpro	IPR013649	Integrin alpha-2
P17301	interpro	IPR032695	Integrin domain superfamily
P17301	interpro	IPR028994	Integrin alpha, N-terminal
P17301	interpro	IPR000413	Integrin alpha chain
P17301	interpro	IPR018184	Integrin alpha chain, C-terminal cytoplasmic region, conserved site
O95810	interpro	IPR033298	Caveolae-associated protein 2
O95810	interpro	IPR026752	Cavin family
Q5SZL2	interpro	IPR029778	Centrosomal protein of 85kDa-like
P48060	interpro	IPR014044	CAP domain
P48060	interpro	IPR018244	Allergen V5/Tpx-1-related, conserved site
P48060	interpro	IPR035940	CAP superfamily
P48060	interpro	IPR002413	Ves allergen
P48060	interpro	IPR034121	Glioma pathogenesis-related protein 1-like, SCP domain
P48060	interpro	IPR001283	Cysteine-rich secretory protein, allergen V5/Tpx-1-related
P63313	interpro	IPR001152	Beta-thymosin
P63313	interpro	IPR038386	Beta-thymosin superfamily
Q9UKV8	interpro	IPR032472	Argonaute linker 2 domain
Q9UKV8	interpro	IPR003165	Piwi domain
Q9UKV8	interpro	IPR003100	PAZ domain
Q9UKV8	CDD	cd04657	Piwi_ago-like
Q9UKV8	interpro	IPR012337	Ribonuclease H-like superfamily
Q9UKV8	interpro	IPR032473	Protein argonaute, Mid domain
Q9UKV8	interpro	IPR036085	PAZ domain superfamily
Q9UKV8	interpro	IPR014811	Argonaute, linker 1 domain
Q9UKV8	interpro	IPR032474	Protein argonaute, N-terminal
Q9UKV8	interpro	IPR036397	Ribonuclease H superfamily
Q9UKV8	CDD	cd02846	PAZ_argonaute_like
Q9UKV8	interpro	IPR028602	Protein argonaute-2
Q4G0X4	interpro	IPR000210	BTB/POZ domain
Q4G0X4	interpro	IPR003131	Potassium channel tetramerisation-type BTB domain
Q4G0X4	interpro	IPR011333	SKP1/BTB/POZ domain superfamily
Q9UM22	interpro	IPR001299	Ependymin
Q9UM22	interpro	IPR018224	Ependymin, conserved site
O43493	interpro	IPR026084	Trans-Golgi network integral membrane protein TGN38
Q5JS37	interpro	IPR013017	NHL repeat, subgroup
Q5JS37	interpro	IPR001258	NHL repeat
Q5JS37	interpro	IPR011042	Six-bladed beta-propeller, TolB-like
P15509	interpro	IPR036116	Fibronectin type III superfamily
P15509	interpro	IPR013783	Immunoglobulin-like fold
P15509	interpro	IPR015321	Type I cytokine receptor, cytokine-binding domain
P15509	interpro	IPR003532	Short hematopoietin receptor, family 2, conserved site
P15509	interpro	IPR003961	Fibronectin type III
Q2TB90	CDD	cd00012	NBD_sugar-kinase_HSP70_actin
Q2TB90	PRINTS	PR00475	Hexokinase family signature
Q2TB90	interpro	IPR019807	Hexokinase, binding site
Q2TB90	interpro	IPR001312	Hexokinase
Q2TB90	interpro	IPR022672	Hexokinase, N-terminal
Q2TB90	interpro	IPR022673	Hexokinase, C-terminal
P49662	interpro	IPR002138	Peptidase C14, caspase non-catalytic subunit p10
P49662	interpro	IPR015917	Peptidase C14A, caspase catalytic domain
P49662	interpro	IPR011029	Death-like domain superfamily
P49662	interpro	IPR029030	Caspase-like domain superfamily
P49662	interpro	IPR001309	Peptidase C14, p20 domain
P49662	interpro	IPR001315	CARD domain
P49662	CDD	cd08325	CARD_CASP1-like
P49662	Pfam	PF00656	Caspase domain
P49662	interpro	IPR016129	Peptidase family C14A, His active site
P49662	interpro	IPR033139	Peptidase family C14A, cysteine active site
O14832	interpro	IPR008775	Phytanoyl-CoA dioxygenase
P00749	interpro	IPR001314	Peptidase S1A, chymotrypsin family
P00749	interpro	IPR000001	Kringle
P00749	PRINTS	PR00018	Kringle domain signature
P00749	interpro	IPR001254	Serine proteases, trypsin domain
P00749	interpro	IPR018114	Serine proteases, trypsin family, histidine active site
P00749	interpro	IPR013806	Kringle-like fold
P00749	interpro	IPR000742	EGF-like domain
P00749	interpro	IPR038178	Kringle superfamily
P00749	interpro	IPR018056	Kringle, conserved site
P00749	interpro	IPR033116	Serine proteases, trypsin family, serine active site
P00749	interpro	IPR013032	EGF-like, conserved site
P00749	interpro	IPR009003	Peptidase S1, PA clan
P00749	interpro	IPR034814	Urokinase-type plasminogen activator
P20908	interpro	IPR013320	Concanavalin A-like lectin/glucanase domain superfamily
P20908	interpro	IPR000885	Fibrillar collagen, C-terminal
P20908	interpro	IPR001791	Laminin G domain
P20908	interpro	IPR008160	Collagen triple helix repeat
Q14764	interpro	IPR002499	Major vault protein, N-terminal
Q14764	interpro	IPR021870	Major vault protein, shoulder domain
Q14764	interpro	IPR039059	Major vault protein
P43121	interpro	IPR036179	Immunoglobulin-like domain superfamily
P43121	interpro	IPR013783	Immunoglobulin-like fold
P43121	interpro	IPR007110	Immunoglobulin-like domain
P43121	interpro	IPR013162	CD80-like, immunoglobulin C2-set
P43121	CDD	cd00096	Ig
P43121	interpro	IPR003599	Immunoglobulin subtype
P43121	interpro	IPR013106	Immunoglobulin V-set domain
P43121	Pfam	PF13927	Immunoglobulin domain
P43121	interpro	IPR013151	Immunoglobulin
P43121	interpro	IPR003598	Immunoglobulin subtype 2
P52823	interpro	IPR004978	Stanniocalcin
O95833	SFLD	SFLDS00019	Glutathione Transferase (cytosolic)
O95833	interpro	IPR004045	Glutathione S-transferase, N-terminal
O95833	CDD	cd03061	GST_N_CLIC
O95833	interpro	IPR002946	Intracellular chloride channel
O95833	CDD	cd10299	GST_C_CLIC3
O95833	interpro	IPR030261	Chloride intracellular channel protein 3
O95833	interpro	IPR036249	Thioredoxin-like superfamily
O95833	interpro	IPR036282	Glutathione S-transferase, C-terminal domain superfamily
O95833	interpro	IPR010987	Glutathione S-transferase, C-terminal-like
O95833	Pfam	PF13410	Glutathione S-transferase, C-terminal domain
Q9NUD5	interpro	IPR001878	Zinc finger, CCHC-type
Q9NUD5	interpro	IPR036875	Zinc finger, CCHC-type superfamily
O95873	ProDom	PD191299	C6ORF47 G4 HOMOLOG POLYMORPHISM
O95873	interpro	IPR029073	Protein of unknown function DUF4661
Q13751	CDD	cd00055	EGF_Lam
Q13751	interpro	IPR002049	Laminin EGF domain
Q13751	interpro	IPR013032	EGF-like, conserved site
Q13751	interpro	IPR038684	Laminin, N-terminal domain superfamily
Q13751	interpro	IPR008211	Laminin, N-terminal
Q13751	PRINTS	PR00011	Type III EGF-like signature
Q7Z7K0	ProSiteProfiles	PS51808	Coiled coil-helix-coiled coil-helix (CHCH) domain profile.
Q7Z7K0	interpro	IPR013892	Cytochrome c oxidase biogenesis protein Cmc1-like
Q9BWH2	interpro	IPR007014	FUN14
P05362	interpro	IPR036179	Immunoglobulin-like domain superfamily
P05362	interpro	IPR013783	Immunoglobulin-like fold
P05362	CDD	cd00096	Ig
P05362	interpro	IPR003987	Intercellular adhesion molecule/vascular cell adhesion molecule, N-terminal
P05362	interpro	IPR003599	Immunoglobulin subtype
P05362	CDD	cd05755	Ig2_ICAM-1_like
P05362	interpro	IPR013768	Intercellular adhesion molecule, N-terminal
P05362	interpro	IPR003988	Intercellular adhesion molecule
Q92805	interpro	IPR000237	GRIP domain
P08183	interpro	IPR036640	ABC transporter type 1, transmembrane domain superfamily
P08183	interpro	IPR030258	Multidrug resistance protein 1
P08183	CDD	cd03249	ABC_MTABC3_MDL1_MDL2
P08183	interpro	IPR003439	ABC transporter-like
P08183	interpro	IPR027417	P-loop containing nucleoside triphosphate hydrolase
P08183	interpro	IPR011527	ABC transporter type 1, transmembrane domain
P08183	interpro	IPR017871	ABC transporter, conserved site
P08183	interpro	IPR003593	AAA+ ATPase domain
Q16610	interpro	IPR008605	Extracellular matrix protein 1
Q16610	interpro	IPR020858	Serum albumin-like
Q9NX40	interpro	IPR009764	Ovarian carcinoma immunoreactive antigen
P07942	interpro	IPR002049	Laminin EGF domain
P07942	CDD	cd00055	EGF_Lam
P07942	interpro	IPR008211	Laminin, N-terminal
P07942	interpro	IPR000742	EGF-like domain
P07942	PRINTS	PR00011	Type III EGF-like signature
P07942	interpro	IPR013015	Laminin IV type B
P07942	interpro	IPR038684	Laminin, N-terminal domain superfamily
Q9Y2Y0	interpro	IPR023379	BART domain
Q9Y2Y0	interpro	IPR038849	ADP-ribosylation factor-like protein 2-binding protein
Q15434	interpro	IPR012677	Nucleotide-binding alpha-beta plait domain superfamily
Q15434	interpro	IPR000504	RNA recognition motif domain
Q15434	CDD	cd12474	RRM2_MSSP2
Q15434	interpro	IPR035979	RNA-binding domain superfamily
P80303	interpro	IPR011992	EF-hand domain pair
P80303	interpro	IPR018247	EF-Hand 1, calcium-binding site
P80303	interpro	IPR002048	EF-hand domain
P80303	interpro	IPR028813	Nucleobindin-2
O75503	interpro	IPR026138	Ceroid-lipofuscinosis neuronal protein 5
O14933	interpro	IPR016135	Ubiquitin-conjugating enzyme/RWD-like
O14933	interpro	IPR023313	Ubiquitin-conjugating enzyme, active site
O14933	interpro	IPR000608	Ubiquitin-conjugating enzyme E2
P09104	interpro	IPR020811	Enolase, N-terminal
P09104	interpro	IPR020810	Enolase, C-terminal TIM barrel domain
P09104	interpro	IPR036849	Enolase-like, C-terminal domain superfamily
P09104	interpro	IPR020809	Enolase, conserved site
P09104	interpro	IPR029017	Enolase-like, N-terminal
P09104	interpro	IPR000941	Enolase
P09104	SFLD	SFLDF00002	enolase
P09104	interpro	IPR034390	Enolase-like superfamily
P54803	interpro	IPR001286	Glycoside hydrolase, family 59
P54803	interpro	IPR017853	Glycoside hydrolase superfamily
P54803	interpro	IPR035394	Glycosyl hydrolase family 59, central domain
P54803	interpro	IPR013785	Aldolase-type TIM barrel
Q9Y4G8	interpro	IPR000595	Cyclic nucleotide-binding domain
Q9Y4G8	interpro	IPR001478	PDZ domain
Q9Y4G8	interpro	IPR000651	Ras-like guanine nucleotide exchange factor, N-terminal
Q9Y4G8	interpro	IPR000159	Ras-associating (RA) domain
Q9Y4G8	interpro	IPR001895	Ras guanine-nucleotide exchange factors catalytic domain
Q9Y4G8	CDD	cd00992	PDZ_signaling
Q9Y4G8	interpro	IPR018490	Cyclic nucleotide-binding-like
Q9Y4G8	interpro	IPR029071	Ubiquitin-like domain superfamily
Q9Y4G8	interpro	IPR014710	RmlC-like jelly roll fold
Q9Y4G8	CDD	cd01785	PDZ_GEF_RA
Q9Y4G8	interpro	IPR023578	Ras guanine nucleotide exchange factor domain superfamily
Q9Y4G8	interpro	IPR036034	PDZ superfamily
Q9Y4G8	interpro	IPR030739	Rap guanine nucleotide exchange factor 2
P20339	interpro	IPR027417	P-loop containing nucleoside triphosphate hydrolase
P20339	interpro	IPR005225	Small GTP-binding protein domain
P20339	PRINTS	PR00449	Transforming protein P21 ras signature
P20339	ProSiteProfiles	PS51419	small GTPase Rab1 family profile.
P20339	interpro	IPR001806	Small GTPase superfamily
P20339	CDD	cd01860	Rab5_related
P23634	interpro	IPR034304	Plasma membrane calcium-transporting ATPase 4
P23634	CDD	cd02081	P-type_ATPase_Ca_PMCA-like
P23634	interpro	IPR001757	P-type ATPase
P23634	interpro	IPR006068	Cation-transporting P-type ATPase, C-terminal
P23634	interpro	IPR023214	HAD superfamily
P23634	PRINTS	PR00119	P-type cation-transporting ATPase superfamily signature
P23634	Pfam	PF00122	E1-E2 ATPase
P23634	interpro	IPR036412	HAD-like superfamily
P23634	SFLD	SFLDF00027	p-type atpase
P23634	interpro	IPR018303	P-type ATPase, phosphorylation site
P23634	interpro	IPR006408	P-type ATPase, subfamily IIB
P23634	interpro	IPR004014	Cation-transporting P-type ATPase, N-terminal
P23634	interpro	IPR023298	P-type ATPase, transmembrane domain superfamily
P23634	Pfam	PF00702	haloacid dehalogenase-like hydrolase
P23634	SFLD	SFLDG00002	C1.7: P-type atpase like
P23634	interpro	IPR022141	Plasma membrane calcium transporting P-type ATPase, C-terminal
P23634	Pfam	PF13246	Cation transport ATPase (P-type)
P23634	interpro	IPR008250	P-type ATPase, A domain superfamily
P23634	interpro	IPR023299	P-type ATPase, cytoplasmic domain N
Q6ZXV5	interpro	IPR011990	Tetratricopeptide-like helical domain superfamily
Q6ZXV5	interpro	IPR019734	Tetratricopeptide repeat
Q6ZXV5	interpro	IPR013026	Tetratricopeptide repeat-containing domain
Q6ZXV5	Pfam	PF14559	Tetratricopeptide repeat
Q6ZXV5	Pfam	PF13432	Tetratricopeptide repeat
Q6ZXV5	interpro	IPR013618	Domain of unknown function DUF1736
Q6ZXV5	ProSiteProfiles	PS51257	Prokaryotic membrane lipoprotein lipid attachment site profile.
Q8NBJ4	interpro	IPR026139	GOLM1/CASC4 family
Q8NBJ4	interpro	IPR026143	Golgi membrane protein 1
O75093	interpro	IPR001611	Leucine-rich repeat
O75093	interpro	IPR013032	EGF-like, conserved site
O75093	CDD	cd00054	EGF_CA
O75093	interpro	IPR000742	EGF-like domain
O75093	interpro	IPR001791	Laminin G domain
O75093	interpro	IPR032675	Leucine-rich repeat domain superfamily
O75093	interpro	IPR006207	Cystine knot, C-terminal
O75093	interpro	IPR003591	Leucine-rich repeat, typical subtype
O75093	interpro	IPR018097	EGF-like calcium-binding, conserved site
O75093	interpro	IPR013320	Concanavalin A-like lectin/glucanase domain superfamily
O75093	interpro	IPR003645	Follistatin-like, N-terminal
O75093	CDD	cd00110	LamG
O75093	interpro	IPR001881	EGF-like calcium-binding domain
O75093	interpro	IPR000483	Cysteine-rich flanking region, C-terminal
O75093	interpro	IPR000152	EGF-type aspartate/asparagine hydroxylation site
O75093	interpro	IPR009030	Growth factor receptor cysteine-rich domain superfamily
O75093	interpro	IPR000372	Leucine-rich repeat N-terminal domain
Q96K49	interpro	IPR009637	Lung seven transmembrane receptor-like
Q12841	interpro	IPR002048	EF-hand domain
Q12841	CDD	cd16233	EFh_SPARC_FSTL1
Q12841	interpro	IPR002350	Kazal domain
Q12841	interpro	IPR015369	Follistatin/Osteonectin EGF domain
Q12841	CDD	cd00104	KAZAL_FS
Q12841	interpro	IPR036773	TGF-beta binding (TB) domain superfamily
Q12841	interpro	IPR011992	EF-hand domain pair
Q12841	interpro	IPR036058	Kazal domain superfamily
Q12841	interpro	IPR003645	Follistatin-like, N-terminal
P61009	interpro	IPR007653	Signal peptidase complex subunit 3
P61009	ProSiteProfiles	PS51257	Prokaryotic membrane lipoprotein lipid attachment site profile.
O00469	interpro	IPR001006	Procollagen-lysine 5-dioxygenase
O00469	interpro	IPR029044	Nucleotide-diphospho-sugar transferases
O00469	interpro	IPR006620	Prolyl 4-hydroxylase, alpha subunit
O00469	interpro	IPR005123	Oxoglutarate/iron-dependent dioxygenase
Q13308	interpro	IPR007110	Immunoglobulin-like domain
Q13308	interpro	IPR013783	Immunoglobulin-like fold
Q13308	CDD	cd00096	Ig
Q13308	CDD	cd05760	Ig2_PTK7
Q13308	interpro	IPR036179	Immunoglobulin-like domain superfamily
Q13308	interpro	IPR000719	Protein kinase domain
Q13308	interpro	IPR003598	Immunoglobulin subtype 2
Q13308	Pfam	PF13927	Immunoglobulin domain
Q13308	CDD	cd05046	PTK_CCK4
Q13308	interpro	IPR001245	Serine-threonine/tyrosine-protein kinase, catalytic domain
Q13308	interpro	IPR033592	Inactive tyrosine-protein kinase 7
Q13308	interpro	IPR013098	Immunoglobulin I-set
Q13308	interpro	IPR008266	Tyrosine-protein kinase, active site
Q13308	interpro	IPR003599	Immunoglobulin subtype
Q13308	interpro	IPR011009	Protein kinase-like domain superfamily
Q9UII2	interpro	IPR007648	Mitochondrial ATPase inhibitor
Q00688	interpro	IPR001179	FKBP-type peptidyl-prolyl cis-trans isomerase domain
Q00688	interpro	IPR023566	Peptidyl-prolyl cis-trans isomerase, FKBP-type
Q5TC84	interpro	IPR006757	Opioid growth factor receptor (OGFr) conserved domain
Q8IV20	interpro	IPR003730	Multi-copper polyphenol oxidoreductase
Q8IV20	interpro	IPR011324	Cytotoxic necrotizing factor-like, catalytic
Q8IV20	interpro	IPR038371	Multi-copper polyphenol oxidoreductase superfamily
P15151	interpro	IPR013162	CD80-like, immunoglobulin C2-set
P15151	interpro	IPR013106	Immunoglobulin V-set domain
P15151	interpro	IPR036179	Immunoglobulin-like domain superfamily
P15151	CDD	cd05718	Ig1_PVR_like
P15151	interpro	IPR007110	Immunoglobulin-like domain
P15151	interpro	IPR013783	Immunoglobulin-like fold
P15151	interpro	IPR003599	Immunoglobulin subtype
P15151	CDD	cd07703	Ig2_Nectin-2_like
Q9BSR8	interpro	IPR006977	Yip1 domain
Q86X83	interpro	IPR037354	COMM domain-containing protein 2
Q86X83	interpro	IPR017920	COMM domain
Q8NDA8	interpro	IPR016024	Armadillo-type fold
Q8NDA8	interpro	IPR021133	HEAT, type 2
Q8NDA8	interpro	IPR011989	Armadillo-like helical
Q8NDA8	interpro	IPR000357	HEAT repeat
Q8WW59	interpro	IPR003879	Butyrophylin-like, SPRY domain
Q8WW59	interpro	IPR003877	SPRY domain
Q8WW59	interpro	IPR001870	B30.2/SPRY domain
Q8WW59	interpro	IPR013320	Concanavalin A-like lectin/glucanase domain superfamily
Q8WW59	CDD	cd12903	SPRY_PRY_SPRYD4
Q03518	interpro	IPR003593	AAA+ ATPase domain
Q03518	interpro	IPR013305	ABC transporter Tap-like
Q03518	PRINTS	PR01896	ABC transporter family B2 signature
Q03518	interpro	IPR011527	ABC transporter type 1, transmembrane domain
Q03518	interpro	IPR013306	Antigen peptide transporter 1
Q03518	interpro	IPR017871	ABC transporter, conserved site
Q03518	CDD	cd03248	ABCC_TAP
Q03518	interpro	IPR036640	ABC transporter type 1, transmembrane domain superfamily
Q03518	interpro	IPR027417	P-loop containing nucleoside triphosphate hydrolase
Q03518	interpro	IPR003439	ABC transporter-like
Q6UWE0	interpro	IPR001611	Leucine-rich repeat
Q6UWE0	interpro	IPR001660	Sterile alpha motif domain
Q6UWE0	interpro	IPR003591	Leucine-rich repeat, typical subtype
Q6UWE0	interpro	IPR001841	Zinc finger, RING-type
Q6UWE0	interpro	IPR013083	Zinc finger, RING/FYVE/PHD-type
Q6UWE0	CDD	cd09523	SAM_TAL
Q6UWE0	CDD	cd16515	RING-HC_LRSAM1
Q6UWE0	Pfam	PF13920	Zinc finger, C3HC4 type (RING finger)
Q6UWE0	interpro	IPR032675	Leucine-rich repeat domain superfamily
Q6UWE0	interpro	IPR013761	Sterile alpha motif/pointed domain superfamily
Q9H7C9	interpro	IPR034096	Mth938 domain-containing protein
Q9H7C9	interpro	IPR036748	MTH938-like superfamily
Q9H7C9	interpro	IPR007523	NDUFAF3/Mth938 domain-containing protein
Q8TBQ9	interpro	IPR009653	Protein kish
P35237	interpro	IPR036186	Serpin superfamily
P35237	interpro	IPR023796	Serpin domain
P35237	interpro	IPR023795	Serpin, conserved site
P35237	interpro	IPR000215	Serpin family
Q92520	Pfam	PF15711	Interleukin-like EMT inducer
Q92520	CDD	cd13940	ILEI_FAM3C
Q92520	interpro	IPR039219	Protein FAM3C
Q92520	interpro	IPR039220	FAM3 family
Q96SW2	interpro	IPR034750	CULT domain
Q96SW2	interpro	IPR003111	Lon, substrate-binding domain
Q96SW2	interpro	IPR004910	Yippee/Mis18/Cereblon
Q96SW2	interpro	IPR015947	PUA-like superfamily
P21589	interpro	IPR008334	5'-Nucleotidase, C-terminal
P21589	interpro	IPR006146	5'-Nucleotidase, conserved site
P21589	CDD	cd07409	MPP_CD73_N
P21589	interpro	IPR006179	5'-Nucleotidase/apyrase
P21589	interpro	IPR029052	Metallo-dependent phosphatase-like
P21589	interpro	IPR036907	5'-Nucleotidase, C-terminal domain superfamily
P21589	interpro	IPR004843	Calcineurin-like phosphoesterase domain, ApaH type
Q9P2E9	interpro	IPR007794	Ribosome receptor lysine/proline rich
Q9UBR2	interpro	IPR038765	Papain-like cysteine peptidase superfamily
Q9UBR2	interpro	IPR000668	Peptidase C1A, papain C-terminal
Q9UBR2	interpro	IPR033157	Cathepsin X
Q9UBR2	interpro	IPR025661	Cysteine peptidase, asparagine active site
Q9UBR2	interpro	IPR013128	Peptidase C1A
P52943	interpro	IPR001781	Zinc finger, LIM-type
P52943	CDD	cd09476	LIM1_TLP
Q7Z3E5	interpro	IPR006594	LIS1 homology motif
Q7Z3E5	interpro	IPR011989	Armadillo-like helical
Q7Z3E5	interpro	IPR016024	Armadillo-type fold
Q9Y2H6	PRINTS	PR00014	Fibronectin type III repeat signature
Q9Y2H6	interpro	IPR036116	Fibronectin type III superfamily
Q9Y2H6	interpro	IPR003961	Fibronectin type III
Q9Y2H6	interpro	IPR013783	Immunoglobulin-like fold
Q15847	interpro	IPR034450	Adipogenesis regulatory factor
Q92844	interpro	IPR024581	Tbk1/Ikki binding domain
L0R6Q1	interpro	IPR027854	Short transmembrane mitochondrial protein 1
Q86W25	interpro	IPR007111	NACHT nucleoside triphosphatase
Q86W25	interpro	IPR004020	DAPIN domain
Q86W25	interpro	IPR027417	P-loop containing nucleoside triphosphate hydrolase
Q86W25	interpro	IPR032675	Leucine-rich repeat domain superfamily
Q86W25	interpro	IPR011029	Death-like domain superfamily
Q86W25	CDD	cd08320	Pyrin_NALPs
Q86W25	interpro	IPR001611	Leucine-rich repeat
O75674	CDD	cd14237	GAT_TM1L1
O75674	interpro	IPR027428	TOM1-like protein 1
O75674	interpro	IPR038425	GAT domain superfamily
O75674	interpro	IPR002014	VHS domain
O75674	interpro	IPR008942	ENTH/VHS
O75674	interpro	IPR004152	GAT domain
O75674	interpro	IPR014645	Target of Myb protein 1
O75674	CDD	cd03565	VHS_Tom1
Q9NW68	interpro	IPR005607	BSD domain
Q9NW68	interpro	IPR035925	BSD domain superfamily
P21695	interpro	IPR011128	Glycerol-3-phosphate dehydrogenase, NAD-dependent, N-terminal
P21695	interpro	IPR006168	Glycerol-3-phosphate dehydrogenase, NAD-dependent
P21695	interpro	IPR017751	Glycerol-3-phosphate dehydrogenase, NAD-dependent, eukaryotic
P21695	interpro	IPR036291	NAD(P)-binding domain superfamily
P21695	interpro	IPR006109	Glycerol-3-phosphate dehydrogenase, NAD-dependent, C-terminal
P21695	interpro	IPR008927	6-phosphogluconate dehydrogenase-like, C-terminal domain superfamily
P21695	interpro	IPR013328	6-phosphogluconate dehydrogenase, domain 2
Q9BXS4	interpro	IPR022065	Uncharacterised protein family, TMEM59
P10321	interpro	IPR011162	MHC classes I/II-like antigen recognition protein
P10321	interpro	IPR007110	Immunoglobulin-like domain
P10321	interpro	IPR003597	Immunoglobulin C1-set
P10321	interpro	IPR010579	MHC class I, alpha chain, C-terminal
P10321	interpro	IPR037055	MHC class I-like antigen recognition-like superfamily
P10321	interpro	IPR036179	Immunoglobulin-like domain superfamily
P10321	interpro	IPR013783	Immunoglobulin-like fold
P10321	interpro	IPR001039	MHC class I alpha chain, alpha1 alpha2 domains
P10321	CDD	cd07698	IgC_MHC_I_alpha3
P10321	interpro	IPR011161	MHC class I-like antigen recognition-like
Q9H4G4	interpro	IPR001283	Cysteine-rich secretory protein, allergen V5/Tpx-1-related
Q9H4G4	interpro	IPR018244	Allergen V5/Tpx-1-related, conserved site
Q9H4G4	interpro	IPR035940	CAP superfamily
Q9H4G4	interpro	IPR034113	Golgi-associated plant pathogenesis-related protein 1, SCP domain
Q9H4G4	interpro	IPR014044	CAP domain
Q92820	interpro	IPR011697	Peptidase C26
Q92820	interpro	IPR015527	Peptidase C26, gamma-glutamyl hydrolase
Q92820	CDD	cd01747	GATase1_Glutamyl_Hydrolase
Q92820	interpro	IPR029062	Class I glutamine amidotransferase-like
Q9UQN3	interpro	IPR005024	Snf7 family
P04439	interpro	IPR013783	Immunoglobulin-like fold
P04439	interpro	IPR011162	MHC classes I/II-like antigen recognition protein
P04439	interpro	IPR010579	MHC class I, alpha chain, C-terminal
P04439	interpro	IPR036179	Immunoglobulin-like domain superfamily
P04439	interpro	IPR037055	MHC class I-like antigen recognition-like superfamily
P04439	interpro	IPR003597	Immunoglobulin C1-set
P04439	interpro	IPR003006	Immunoglobulin/major histocompatibility complex, conserved site
P04439	interpro	IPR011161	MHC class I-like antigen recognition-like
P04439	interpro	IPR001039	MHC class I alpha chain, alpha1 alpha2 domains
P04439	CDD	cd07698	IgC_MHC_I_alpha3
P04439	interpro	IPR007110	Immunoglobulin-like domain
Q8TED1	interpro	IPR029760	Glutathione peroxidase conserved site
Q8TED1	interpro	IPR000889	Glutathione peroxidase
Q8TED1	interpro	IPR036249	Thioredoxin-like superfamily
Q8TED1	interpro	IPR013376	Glutathione peroxidase Gpx7, putative
P63218	interpro	IPR015898	G-protein gamma-like domain
P63218	interpro	IPR036284	G-protein gamma-like domain superfamily
P63218	interpro	IPR001770	G-protein, gamma subunit
P22694	interpro	IPR000719	Protein kinase domain
P22694	interpro	IPR039083	cAMP-dependent protein kinase catalytic subunit beta
P22694	interpro	IPR011009	Protein kinase-like domain superfamily
P22694	interpro	IPR017441	Protein kinase, ATP binding site
P22694	interpro	IPR000961	AGC-kinase, C-terminal
P22694	CDD	cd14209	STKc_PKA
P22694	interpro	IPR008271	Serine/threonine-protein kinase, active site
Q9UJ83	interpro	IPR029035	DHS-like NAD/FAD-binding domain superfamily
Q9UJ83	interpro	IPR011766	Thiamine pyrophosphate enzyme, C-terminal TPP-binding
Q9UJ83	interpro	IPR012001	Thiamine pyrophosphate enzyme, N-terminal TPP-binding domain
Q9UJ83	CDD	cd02004	TPP_BZL_OCoD_HPCL
Q9UJ83	interpro	IPR012000	Thiamine pyrophosphate enzyme, central domain
Q9UJ83	interpro	IPR029061	Thiamin diphosphate-binding fold
Q9UJ83	CDD	cd07035	TPP_PYR_POX_like
Q9Y624	interpro	IPR013783	Immunoglobulin-like fold
Q9Y624	interpro	IPR013106	Immunoglobulin V-set domain
Q9Y624	interpro	IPR007110	Immunoglobulin-like domain
Q9Y624	interpro	IPR003599	Immunoglobulin subtype
Q9Y624	interpro	IPR036179	Immunoglobulin-like domain superfamily
Q9Y624	Pfam	PF13927	Immunoglobulin domain
Q9Y624	CDD	cd00096	Ig
Q9Y624	interpro	IPR003598	Immunoglobulin subtype 2
P46934	interpro	IPR036020	WW domain superfamily
P46934	interpro	IPR001202	WW domain
P46934	interpro	IPR035983	HECT, E3 ligase catalytic domain
P46934	interpro	IPR035892	C2 domain superfamily
P46934	interpro	IPR000569	HECT domain
Q9Y394	interpro	IPR002347	Short-chain dehydrogenase/reductase SDR
Q9Y394	CDD	cd05332	11beta-HSD1_like_SDR_c
Q9Y394	interpro	IPR020904	Short-chain dehydrogenase/reductase, conserved site
Q9Y394	interpro	IPR036291	NAD(P)-binding domain superfamily
Q96HD1	interpro	IPR009030	Growth factor receptor cysteine-rich domain superfamily
Q96HD1	CDD	cd00054	EGF_CA
Q96HD1	interpro	IPR006212	Furin-like repeat
Q96HD1	interpro	IPR000742	EGF-like domain
Q96HD1	interpro	IPR001881	EGF-like calcium-binding domain
Q96HD1	interpro	IPR013032	EGF-like, conserved site
Q96HD1	interpro	IPR018097	EGF-like calcium-binding, conserved site
Q96HD1	interpro	IPR000152	EGF-type aspartate/asparagine hydroxylation site
Q96HD1	interpro	IPR002049	Laminin EGF domain
Q96HD1	interpro	IPR021852	Domain of unknown function DUF3456
Q9Y2G5	interpro	IPR019378	GDP-fucose protein O-fucosyltransferase
Q9Y2G5	CDD	cd11298	O-FucT-2
Q9NVM4	interpro	IPR014644	Protein arginine N-methyltransferase PRMT7
Q9NVM4	interpro	IPR025799	Protein arginine N-methyltransferase
Q9NVM4	interpro	IPR029063	S-adenosyl-L-methionine-dependent methyltransferase
Q9NVM4	Pfam	PF06325	Ribosomal protein L11 methyltransferase (PrmA)
Q9NVM4	CDD	cd02440	AdoMet_MTases
O95166	interpro	IPR004241	Autophagy protein Atg8 ubiquitin-like
O95166	interpro	IPR029071	Ubiquitin-like domain superfamily
Q96RF0	interpro	IPR027267	AH/BAR domain superfamily
Q96RF0	interpro	IPR001683	Phox homologous domain
Q96RF0	interpro	IPR036871	PX domain superfamily
Q96RF0	interpro	IPR036028	SH3-like domain superfamily
Q96RF0	interpro	IPR014536	Sorting nexin 9 family
Q96RF0	interpro	IPR035557	Sorting nexin-18, SH3 domain
Q96RF0	interpro	IPR039358	Sorting nexin-like
Q96RF0	interpro	IPR001452	SH3 domain
Q96RF0	interpro	IPR019497	Sorting nexin protein, WASP-binding domain
Q96RF0	interpro	IPR035703	SNX18, PX domain
Q96LJ7	interpro	IPR002347	Short-chain dehydrogenase/reductase SDR
Q96LJ7	CDD	cd09763	DHRS1-like_SDR_c
Q96LJ7	interpro	IPR036291	NAD(P)-binding domain superfamily
Q8NBM8	interpro	IPR036188	FAD/NAD(P)-binding domain superfamily
Q8NBM8	Pfam	PF13450	NAD(P)-binding Rossmann-like domain
Q8NBM8	interpro	IPR017046	Prenylcysteine oxidase
Q8NBM8	interpro	IPR010795	Prenylcysteine lyase
P09914	interpro	IPR011990	Tetratricopeptide-like helical domain superfamily
P09914	interpro	IPR019734	Tetratricopeptide repeat
P09914	Pfam	PF13424	Tetratricopeptide repeat
P09914	interpro	IPR024121	Interferon-induced protein with tetratricopeptide repeats 1
P09914	interpro	IPR013026	Tetratricopeptide repeat-containing domain
P10619	interpro	IPR001563	Peptidase S10, serine carboxypeptidase
P10619	interpro	IPR018202	Serine carboxypeptidase, serine active site
P10619	interpro	IPR033124	Serine carboxypeptidases, histidine active site
P10619	interpro	IPR029058	Alpha/Beta hydrolase fold
Q9Y6A9	interpro	IPR009542	Microsomal signal peptidase 12kDa subunit
Q9Y6A9	interpro	IPR037713	Signal peptidase complex subunit Spc1
P09493	interpro	IPR000533	Tropomyosin
O94808	Pfam	PF13522	Glutamine amidotransferase domain
O94808	interpro	IPR035466	GlmS/AgaS, SIS domain 1
O94808	interpro	IPR001347	Sugar isomerase (SIS)
O94808	interpro	IPR029055	Nucleophile aminohydrolases, N-terminal
O94808	interpro	IPR005855	Glucosamine-fructose-6-phosphate aminotransferase, isomerising
O94808	interpro	IPR035490	GlmS/FrlB, SIS domain 2
O94808	CDD	cd00714	GFAT
O94808	interpro	IPR017932	Glutamine amidotransferase type 2 domain
Q9GZM5	interpro	IPR026637	YIP1 family member 3
Q6P1Q0	interpro	IPR011685	LETM1-like
Q6P1Q0	interpro	IPR033122	Letm1 ribosome-binding domain
P31947	interpro	IPR000308	14-3-3 protein
P31947	interpro	IPR037435	14-3-3 protein sigma
P31947	interpro	IPR036815	14-3-3 domain superfamily
P31947	interpro	IPR023409	14-3-3 protein, conserved site
P31947	interpro	IPR023410	14-3-3 domain
Q9H2C0	CDD	cd14735	BACK_Kelch
Q9H2C0	interpro	IPR000210	BTB/POZ domain
Q9H2C0	interpro	IPR011705	BTB/Kelch-associated
Q9H2C0	interpro	IPR017096	BTB-kelch protein
Q9H2C0	interpro	IPR015915	Kelch-type beta propeller
Q9H2C0	interpro	IPR030579	Gigaxonin
Q9H2C0	interpro	IPR006652	Kelch repeat type 1
Q9H2C0	interpro	IPR011333	SKP1/BTB/POZ domain superfamily
Q9Y281	interpro	IPR017904	ADF/Cofilin
Q9Y281	interpro	IPR002108	Actin-depolymerising factor homology domain
Q9Y281	interpro	IPR029006	ADF-H/Gelsolin-like domain superfamily
Q9Y6D6	interpro	IPR023394	Sec7, C-terminal domain superfamily
Q9Y6D6	interpro	IPR032691	Guanine nucleotide exchange factor, N-terminal
Q9Y6D6	interpro	IPR032629	Mon2, dimerisation and cyclophilin-binding domain
Q9Y6D6	interpro	IPR015403	Sec7, C-terminal
Q9Y6D6	interpro	IPR000904	Sec7 domain
Q9Y6D6	interpro	IPR035999	Sec7 domain superfamily
Q9Y6D6	interpro	IPR016024	Armadillo-type fold
Q92599	interpro	IPR027417	P-loop containing nucleoside triphosphate hydrolase
Q92599	interpro	IPR030646	Septin 8
Q92599	interpro	IPR016491	Septin
Q92599	interpro	IPR030379	Septin-type guanine nucleotide-binding (G) domain
Q8NAN2	interpro	IPR019392	Mitoguardin
P45973	interpro	IPR000953	Chromo/chromo shadow domain
P45973	interpro	IPR023779	Chromo domain, conserved site
P45973	interpro	IPR017984	Chromo domain subgroup
P45973	interpro	IPR008251	Chromo shadow domain
P45973	interpro	IPR023780	Chromo domain
P45973	interpro	IPR016197	Chromo-like domain superfamily
Q15165	interpro	IPR002640	Arylesterase
Q15165	interpro	IPR008364	Paraoxonase2
Q15165	interpro	IPR011042	Six-bladed beta-propeller, TolB-like
P13747	interpro	IPR003597	Immunoglobulin C1-set
P13747	interpro	IPR003006	Immunoglobulin/major histocompatibility complex, conserved site
P13747	interpro	IPR010579	MHC class I, alpha chain, C-terminal
P13747	interpro	IPR037055	MHC class I-like antigen recognition-like superfamily
P13747	interpro	IPR036179	Immunoglobulin-like domain superfamily
P13747	interpro	IPR011162	MHC classes I/II-like antigen recognition protein
P13747	interpro	IPR007110	Immunoglobulin-like domain
P13747	interpro	IPR013783	Immunoglobulin-like fold
P13747	CDD	cd07698	IgC_MHC_I_alpha3
P13747	interpro	IPR011161	MHC class I-like antigen recognition-like
P13747	interpro	IPR001039	MHC class I alpha chain, alpha1 alpha2 domains
Q9HBL7	interpro	IPR019319	Protein of unknown function DUF2368
P61769	interpro	IPR003597	Immunoglobulin C1-set
P61769	interpro	IPR015707	Beta-2-Microglobulin
P61769	interpro	IPR003006	Immunoglobulin/major histocompatibility complex, conserved site
P61769	CDD	cd05770	IgC_beta2m
P61769	interpro	IPR013783	Immunoglobulin-like fold
P61769	interpro	IPR036179	Immunoglobulin-like domain superfamily
P61769	interpro	IPR007110	Immunoglobulin-like domain
Q9BQS8	interpro	IPR000306	FYVE zinc finger
Q9BQS8	interpro	IPR009038	GOLD domain
Q9BQS8	CDD	cd15726	FYVE_FYCO1
Q9BQS8	interpro	IPR017455	Zinc finger, FYVE-related
Q9BQS8	interpro	IPR004012	RUN domain
Q9BQS8	interpro	IPR011011	Zinc finger, FYVE/PHD-type
Q9BQS8	interpro	IPR036598	GOLD domain superfamily
Q9BQS8	interpro	IPR013083	Zinc finger, RING/FYVE/PHD-type
Q9BQS8	interpro	IPR037213	RUN domain superfamily
P55085	interpro	IPR017452	GPCR, rhodopsin-like, 7TM
P55085	interpro	IPR000276	G protein-coupled receptor, rhodopsin-like
P55085	interpro	IPR003912	Protease-activated receptor
P55085	ProSiteProfiles	PS51257	Prokaryotic membrane lipoprotein lipid attachment site profile.
P55085	interpro	IPR002281	Protease-activated receptor 2
P55085	CDD	cd15370	7tmA_PAR2
Q16611	interpro	IPR026298	Blc2 family
Q16611	interpro	IPR020717	Apoptosis regulator, Bcl-2, BH1 motif, conserved site
Q16611	interpro	IPR026308	Apoptosis regulator BAK
Q16611	CDD	cd06845	Bcl-2_like
Q16611	interpro	IPR036834	Blc2-like superfamily
Q16611	interpro	IPR020728	Apoptosis regulator, Bcl-2, BH3 motif, conserved site
Q16611	interpro	IPR020726	Apoptosis regulator, Bcl-2, BH2 motif, conserved site
Q16611	interpro	IPR002475	Bcl2-like
P53701	interpro	IPR000511	Cytochrome c/c1 haem-lyase
Q8TCD1	interpro	IPR026776	Uncharacterised protein family UPF0729
P80723	interpro	IPR008408	Brain acid soluble protein 1
Q9Y282	interpro	IPR012936	Endoplasmic reticulum vesicle transporter, C-terminal
Q9Y282	Pfam	PF13850	Endoplasmic Reticulum-Golgi Intermediate Compartment (ERGIC)
O95479	interpro	IPR037171	NagB/RpiA transferase-like
O95479	interpro	IPR036291	NAD(P)-binding domain superfamily
O95479	interpro	IPR005900	6-phosphogluconolactonase, DevB-type
O95479	interpro	IPR022675	Glucose-6-phosphate dehydrogenase, C-terminal
O95479	interpro	IPR001282	Glucose-6-phosphate dehydrogenase
O95479	interpro	IPR006148	Glucosamine/galactosamine-6-phosphate isomerase
O95479	interpro	IPR022674	Glucose-6-phosphate dehydrogenase, NAD-binding
O95479	interpro	IPR019796	Glucose-6-phosphate dehydrogenase, active site
Q96PM5	interpro	IPR001841	Zinc finger, RING-type
Q96PM5	interpro	IPR008913	Zinc finger, CHY-type
Q96PM5	interpro	IPR013083	Zinc finger, RING/FYVE/PHD-type
Q96PM5	interpro	IPR037275	Zinc finger, CTCHY-type superfamily
Q96PM5	CDD	cd16464	RING-H2_Pirh2
Q96PM5	Pfam	PF14599	Zinc-ribbon
Q96PM5	interpro	IPR017921	Zinc finger, CTCHY-type
Q96PM5	interpro	IPR037274	Zinc finger, CHY-type superfamily
Q9UHN6	interpro	IPR011050	Pectin lyase fold/virulence factor
Q9UHN6	interpro	IPR019316	G8 domain
Q9UHN6	CDD	cd13938	PANDER_like_TMEM2
Q9UHN6	Pfam	PF15711	Interleukin-like EMT inducer
P09467	interpro	IPR028343	Fructose-1,6-bisphosphatase
P09467	interpro	IPR000146	Fructose-1,6-bisphosphatase class 1
P09467	interpro	IPR020548	Fructose-1,6-bisphosphatase, active site
P09467	interpro	IPR033391	Fructose-1-6-bisphosphatase class I, N-terminal
Q15067	interpro	IPR006091	Acyl-CoA oxidase/dehydrogenase, central domain
Q15067	interpro	IPR002655	Acyl-CoA oxidase, C-terminal
Q15067	interpro	IPR012258	Acyl-CoA oxidase
Q15067	interpro	IPR036250	Acyl-CoA dehydrogenase-like, C-terminal
Q15067	interpro	IPR029320	Acyl-coenzyme A oxidase, N-terminal
Q15067	interpro	IPR009100	Acyl-CoA dehydrogenase/oxidase, N-terminal and middle domain superfamily
Q15067	interpro	IPR034171	Peroxisomal acyl-coenzyme A oxidase
Q15067	interpro	IPR037069	Acyl-CoA dehydrogenase/oxidase, N-terminal domain superfamily
Q9BZM5	interpro	IPR011161	MHC class I-like antigen recognition-like
Q9BZM5	interpro	IPR011162	MHC classes I/II-like antigen recognition protein
Q9BZM5	interpro	IPR037055	MHC class I-like antigen recognition-like superfamily
P30622	interpro	IPR000938	CAP Gly-rich domain
P30622	interpro	IPR036859	CAP Gly-rich domain superfamily
P30622	interpro	IPR032108	CLIP1, zinc knuckle
P32456	interpro	IPR003191	Guanylate-binding protein/Atlastin, C-terminal
P32456	CDD	cd01851	GBP
P32456	interpro	IPR015894	Guanylate-binding protein, N-terminal
P32456	interpro	IPR036543	Guanylate-binding protein, C-terminal domain superfamily
P32456	interpro	IPR030386	GB1/RHD3-type guanine nucleotide-binding (G) domain
P32456	interpro	IPR027417	P-loop containing nucleoside triphosphate hydrolase
P32456	interpro	IPR037684	Guanylate-binding protein, C-terminal
P08134	interpro	IPR003578	Small GTPase superfamily, Rho type
P08134	CDD	cd01870	RhoA_like
P08134	interpro	IPR005225	Small GTP-binding protein domain
P08134	PRINTS	PR00449	Transforming protein P21 ras signature
P08134	interpro	IPR001806	Small GTPase superfamily
P08134	interpro	IPR027417	P-loop containing nucleoside triphosphate hydrolase
Q9P0R6	interpro	IPR037395	GSK3B-interacting protein
Q9P0R6	interpro	IPR007967	GSKIP domain
Q9P0R6	interpro	IPR023231	GSKIP domain superfamily
O60831	interpro	IPR004895	Prenylated rab acceptor PRA1
Q9UI15	interpro	IPR029973	Transgelin-3
Q9UI15	interpro	IPR036872	CH domain superfamily
Q9UI15	PRINTS	PR00890	Smooth muscle protein 22-alpha (transgelin) signature
Q9UI15	interpro	IPR000557	Calponin repeat
Q9UI15	interpro	IPR001715	Calponin homology domain
Q9UI15	interpro	IPR003096	Smooth muscle protein/calponin
P42345	CDD	cd05169	PIKKc_TOR
P42345	interpro	IPR036940	Phosphatidylinositol 3-/4-kinase, catalytic domain superfamily
P42345	interpro	IPR018936	Phosphatidylinositol 3/4-kinase, conserved site
P42345	interpro	IPR011009	Protein kinase-like domain superfamily
P42345	interpro	IPR000403	Phosphatidylinositol 3-/4-kinase, catalytic domain
P42345	interpro	IPR003152	FATC domain
P42345	interpro	IPR011989	Armadillo-like helical
P42345	interpro	IPR009076	FKBP12-rapamycin binding domain
P42345	interpro	IPR003151	PIK-related kinase, FAT
P42345	interpro	IPR024585	Domain of unknown function DUF3385, target of rapamycin protein
P42345	interpro	IPR011990	Tetratricopeptide-like helical domain superfamily
P42345	interpro	IPR036738	FKBP12-rapamycin binding domain superfamily
P42345	interpro	IPR016024	Armadillo-type fold
P42345	interpro	IPR026683	Serine/threonine-protein kinase TOR
P42345	interpro	IPR014009	PIK-related kinase
Q08722	interpro	IPR036179	Immunoglobulin-like domain superfamily
Q08722	interpro	IPR007110	Immunoglobulin-like domain
Q08722	interpro	IPR013270	CD47 immunoglobulin-like
Q08722	interpro	IPR013783	Immunoglobulin-like fold
Q08722	interpro	IPR037805	Leukocyte surface antigen CD47, IgV
Q08722	interpro	IPR013147	CD47 transmembrane
Q08722	interpro	IPR006704	Leukocyte surface antigen CD47
Q12846	interpro	IPR006012	Syntaxin/epimorphin, conserved site
Q12846	interpro	IPR000727	Target SNARE coiled-coil homology domain
Q12846	interpro	IPR006011	Syntaxin, N-terminal domain
Q12846	CDD	cd15883	SNARE_syntaxin4
Q12846	interpro	IPR010989	SNARE
P17813	interpro	IPR001507	Zona pellucida domain
P17813	ProSiteProfiles	PS51257	Prokaryotic membrane lipoprotein lipid attachment site profile.
Q9UK22	interpro	IPR036047	F-box-like domain superfamily
Q9UK22	interpro	IPR007397	F-box associated (FBA) domain
Q9UK22	interpro	IPR008979	Galactose-binding-like domain superfamily
Q9UK22	interpro	IPR001810	F-box domain
Q969E2	interpro	IPR007273	SCAMP
Q9Y3R5	interpro	IPR007249	Dopey, N-terminal
O95716	PRINTS	PR00449	Transforming protein P21 ras signature
O95716	interpro	IPR005225	Small GTP-binding protein domain
O95716	interpro	IPR001806	Small GTPase superfamily
O95716	interpro	IPR027417	P-loop containing nucleoside triphosphate hydrolase
O95716	ProSiteProfiles	PS51419	small GTPase Rab1 family profile.
O95716	interpro	IPR037872	Rab3
Q13637	interpro	IPR030697	Ras-related protein Rab29/Rab38/Rab32
Q13637	interpro	IPR005225	Small GTP-binding protein domain
Q13637	interpro	IPR027417	P-loop containing nucleoside triphosphate hydrolase
Q13637	ProSiteProfiles	PS51419	small GTPase Rab1 family profile.
Q13637	PRINTS	PR00449	Transforming protein P21 ras signature
Q13637	interpro	IPR001806	Small GTPase superfamily
Q03519	interpro	IPR005293	Antigen peptide transporter 2
Q03519	interpro	IPR036640	ABC transporter type 1, transmembrane domain superfamily
Q03519	interpro	IPR011527	ABC transporter type 1, transmembrane domain
Q03519	interpro	IPR003439	ABC transporter-like
Q03519	interpro	IPR027417	P-loop containing nucleoside triphosphate hydrolase
Q03519	CDD	cd03248	ABCC_TAP
Q03519	interpro	IPR017871	ABC transporter, conserved site
Q03519	interpro	IPR003593	AAA+ ATPase domain
Q03519	interpro	IPR013305	ABC transporter Tap-like
Q9P2C4	CDD	cd14964	7tm_GPCRs
Q9P2C4	Pfam	PF06664	Wnt-binding factor required for Wnt secretion
Q15155	interpro	IPR013784	Carbohydrate-binding-like fold
Q15155	interpro	IPR008969	Carboxypeptidase-like, regulatory domain superfamily
Q15155	Pfam	PF13620	Carboxypeptidase regulatory-like domain
O95786	interpro	IPR014001	Helicase superfamily 1/2, ATP-binding domain
O95786	interpro	IPR001650	Helicase, C-terminal
O95786	CDD	cd12090	MDA5_ID
O95786	interpro	IPR038557	RIG-I-like receptor, C-terminal domain superfamily
O95786	interpro	IPR027417	P-loop containing nucleoside triphosphate hydrolase
O95786	interpro	IPR011545	DEAD/DEAH box helicase domain
O95786	interpro	IPR021673	RIG-I-like receptor, C-terminal regulatory domain
O95786	CDD	cd08817	CARD_RIG-I_r2
O95786	CDD	cd15805	RIG-I_C
O95786	CDD	cd00046	DEXDc
O95786	interpro	IPR031964	Caspase recruitment domain
O43278	interpro	IPR002172	Low-density lipoprotein (LDL) receptor class A repeat
O43278	interpro	IPR002223	Pancreatic trypsin inhibitor Kunitz domain
O43278	interpro	IPR036880	Pancreatic trypsin inhibitor Kunitz domain superfamily
O43278	interpro	IPR011106	Seven cysteines, N-terminal
O43278	interpro	IPR020901	Proteinase inhibitor I2, Kunitz, conserved site
O43278	interpro	IPR023415	Low-density lipoprotein (LDL) receptor class A, conserved site
O43278	interpro	IPR036055	LDL receptor-like superfamily
O43278	interpro	IPR013980	MANSC domain
O43278	interpro	IPR013783	Immunoglobulin-like fold
Q01484	interpro	IPR036770	Ankyrin repeat-containing domain superfamily
Q01484	interpro	IPR000906	ZU5 domain
Q01484	interpro	IPR002110	Ankyrin repeat
Q01484	Pfam	PF13857	Ankyrin repeats (many copies)
Q01484	interpro	IPR020683	Ankyrin repeat-containing domain
Q01484	CDD	cd08804	Death_ank2
Q01484	interpro	IPR000488	Death domain
Q01484	Pfam	PF13637	Ankyrin repeats (many copies)
Q01484	interpro	IPR011029	Death-like domain superfamily
Q99584	interpro	IPR013787	S100/CaBP-9k-type, calcium binding, subdomain
Q99584	CDD	cd05022	S-100A13
Q99584	interpro	IPR028487	Protein S100-A13
Q99584	interpro	IPR011992	EF-hand domain pair
Q9NYM9	CDD	cd15853	SNARE_Bet1
Q9NYM9	interpro	IPR000727	Target SNARE coiled-coil homology domain
Q6L8Q7	interpro	IPR005135	Endonuclease/exonuclease/phosphatase
Q6L8Q7	interpro	IPR036691	Endonuclease/exonuclease/phosphatase superfamily
Q16698	interpro	IPR002347	Short-chain dehydrogenase/reductase SDR
Q16698	Pfam	PF13561	Enoyl-(Acyl carrier protein) reductase
Q16698	CDD	cd05369	TER_DECR_SDR_a
Q16698	interpro	IPR036291	NAD(P)-binding domain superfamily
Q9NQY0	interpro	IPR004148	BAR domain
Q9NQY0	interpro	IPR037428	Bridging integrator 3, BAR domain
Q9NQY0	interpro	IPR027267	AH/BAR domain superfamily
Q6NXT6	interpro	IPR008010	Tapt1 family
P08648	interpro	IPR028994	Integrin alpha, N-terminal
P08648	interpro	IPR000413	Integrin alpha chain
P08648	interpro	IPR013519	Integrin alpha beta-propellor
P08648	interpro	IPR032695	Integrin domain superfamily
P08648	interpro	IPR013649	Integrin alpha-2
P08648	interpro	IPR013517	FG-GAP repeat
P08648	interpro	IPR018184	Integrin alpha chain, C-terminal cytoplasmic region, conserved site
P54852	interpro	IPR004032	PMP-22/EMP/MP20
P54852	interpro	IPR003934	Epithelial membrane protein EMP-3
P54852	interpro	IPR004031	PMP-22/EMP/MP20/Claudin superfamily
O14966	PRINTS	PR00449	Transforming protein P21 ras signature
O14966	interpro	IPR001806	Small GTPase superfamily
O14966	interpro	IPR027417	P-loop containing nucleoside triphosphate hydrolase
O14966	ProSiteProfiles	PS51419	small GTPase Rab1 family profile.
O14966	interpro	IPR030697	Ras-related protein Rab29/Rab38/Rab32
O14966	interpro	IPR005225	Small GTP-binding protein domain
Q9UBR5	interpro	IPR008253	Marvel domain
Q5NDL2	interpro	IPR007657	Glycosyltransferase 61
Q15005	interpro	IPR009582	Signal peptidase complex subunit 2
Q9NZ45	interpro	IPR019610	Iron sulphur domain-containing, mitoNEET, N-terminal
Q9NZ45	interpro	IPR018967	Iron sulphur-containing domain, CDGSH-type
O95297	interpro	IPR013106	Immunoglobulin V-set domain
O95297	interpro	IPR000920	Myelin P0 protein-related
O95297	interpro	IPR029870	Myelin protein zero-like protein 1
O95297	interpro	IPR013783	Immunoglobulin-like fold
O95297	CDD	cd05715	Ig_P0-like
O95297	interpro	IPR036179	Immunoglobulin-like domain superfamily
O95297	interpro	IPR003599	Immunoglobulin subtype
O95297	interpro	IPR007110	Immunoglobulin-like domain
Q9Y2Q9	interpro	IPR019375	Ribosomal protein S28, mitochondrial
O43169	interpro	IPR001199	Cytochrome b5-like heme/steroid binding domain
O43169	interpro	IPR018506	Cytochrome b5, heme-binding site
O43169	interpro	IPR036400	Cytochrome b5-like heme/steroid binding domain superfamily
Q15629	interpro	IPR006634	TRAM/LAG1/CLN8 homology domain
Q15629	interpro	IPR016447	Translocation associated membrane protein
Q15629	interpro	IPR013599	TRAM1-like protein
Q9NVV0	interpro	IPR007866	TRIC channel
Q9NRX4	interpro	IPR038596	Janus superfamily
Q9NRX4	interpro	IPR028441	14kDa phosphohistidine phosphatase
Q9NRX4	interpro	IPR007702	Janus
P07203	interpro	IPR000889	Glutathione peroxidase
P07203	interpro	IPR036249	Thioredoxin-like superfamily
P07203	interpro	IPR029759	Glutathione peroxidase active site
P07203	interpro	IPR029760	Glutathione peroxidase conserved site
Q1KMD3	interpro	IPR035778	Heterogeneous nuclear ribonucleoprotein U, SPRY domain
Q1KMD3	interpro	IPR036361	SAP domain superfamily
Q1KMD3	interpro	IPR003034	SAP domain
Q1KMD3	interpro	IPR013320	Concanavalin A-like lectin/glucanase domain superfamily
Q1KMD3	interpro	IPR003877	SPRY domain
Q1KMD3	interpro	IPR001870	B30.2/SPRY domain
Q1KMD3	interpro	IPR027417	P-loop containing nucleoside triphosphate hydrolase
Q1KMD3	Pfam	PF13671	AAA domain
O43657	interpro	IPR018503	Tetraspanin, conserved site
O43657	interpro	IPR018499	Tetraspanin/Peripherin
O43657	interpro	IPR000301	Tetraspanin
O43657	interpro	IPR008952	Tetraspanin, EC2 domain superfamily
O43657	CDD	cd03161	TM4SF2_6_like_LEL
Q96CD0	interpro	IPR001810	F-box domain
Q96CD0	interpro	IPR036047	F-box-like domain superfamily
Q96CD0	interpro	IPR032675	Leucine-rich repeat domain superfamily
Q13753	interpro	IPR002049	Laminin EGF domain
Q13753	CDD	cd00055	EGF_Lam
Q13753	interpro	IPR031082	Laminin subunit gamma-2
Q13753	interpro	IPR000034	Laminin IV
Q13753	PRINTS	PR00011	Type III EGF-like signature
Q13753	interpro	IPR000742	EGF-like domain
Q5VT79	interpro	IPR018252	Annexin repeat, conserved site
Q5VT79	interpro	IPR037104	Annexin superfamily
Q5VT79	interpro	IPR009115	Annexin A8
Q5VT79	interpro	IPR018502	Annexin repeat
Q5VT79	interpro	IPR001464	Annexin
P49459	interpro	IPR016135	Ubiquitin-conjugating enzyme/RWD-like
P49459	interpro	IPR023313	Ubiquitin-conjugating enzyme, active site
P49459	interpro	IPR000608	Ubiquitin-conjugating enzyme E2
Q7Z5G4	interpro	IPR019383	Golgin subfamily A member 7/ERF4
P01889	interpro	IPR037055	MHC class I-like antigen recognition-like superfamily
P01889	interpro	IPR003597	Immunoglobulin C1-set
P01889	interpro	IPR011161	MHC class I-like antigen recognition-like
P01889	interpro	IPR011162	MHC classes I/II-like antigen recognition protein
P01889	interpro	IPR001039	MHC class I alpha chain, alpha1 alpha2 domains
P01889	interpro	IPR003006	Immunoglobulin/major histocompatibility complex, conserved site
P01889	interpro	IPR013783	Immunoglobulin-like fold
P01889	interpro	IPR036179	Immunoglobulin-like domain superfamily
P01889	CDD	cd07698	IgC_MHC_I_alpha3
P01889	interpro	IPR007110	Immunoglobulin-like domain
P01889	interpro	IPR010579	MHC class I, alpha chain, C-terminal
O00339	interpro	IPR000152	EGF-type aspartate/asparagine hydroxylation site
O00339	interpro	IPR036465	von Willebrand factor A-like domain superfamily
O00339	interpro	IPR030747	Matrilin-2
O00339	interpro	IPR002035	von Willebrand factor, type A
O00339	interpro	IPR036337	Matrilin, coiled-coil domain superfamily
O00339	interpro	IPR013032	EGF-like, conserved site
O00339	PRINTS	PR00453	Von Willebrand factor type A domain signature
O00339	interpro	IPR000742	EGF-like domain
O00339	interpro	IPR009030	Growth factor receptor cysteine-rich domain superfamily
O00339	CDD	cd00054	EGF_CA
O00339	interpro	IPR026823	Complement Clr-like EGF domain
O00339	CDD	cd01475	vWA_Matrilin
O00339	interpro	IPR019466	Matrilin, coiled-coil trimerisation domain
O00339	Pfam	PF14670	Coagulation Factor Xa inhibitory site
O00339	interpro	IPR001881	EGF-like calcium-binding domain
P07311	interpro	IPR017968	Acylphosphatase, conserved site
P07311	interpro	IPR020456	Acylphosphatase
P07311	interpro	IPR001792	Acylphosphatase-like domain
P07311	interpro	IPR036046	Acylphosphatase-like domain superfamily
Q96RQ1	Pfam	PF13850	Endoplasmic Reticulum-Golgi Intermediate Compartment (ERGIC)
Q96RQ1	interpro	IPR012936	Endoplasmic reticulum vesicle transporter, C-terminal
P61916	interpro	IPR003172	MD-2-related lipid-recognition domain
P61916	interpro	IPR033916	ML domain, Npc2 like
P61916	interpro	IPR014756	Immunoglobulin E-set
O94905	interpro	IPR001107	Band 7 domain
O94905	interpro	IPR033294	Erlin1/2
Q8N668	interpro	IPR037351	COMM domain-containing protein 1
Q8N668	interpro	IPR017920	COMM domain
Q8N668	interpro	IPR033776	COMMD1 N-terminal domain
Q9HAT2	interpro	IPR005181	Sialate O-acetylesterase domain
Q9HAT2	interpro	IPR039329	Sialate O-acetylesterase
Q9HAT2	interpro	IPR036514	SGNH hydrolase superfamily
P16422	interpro	IPR036857	Thyroglobulin type-1 superfamily
P16422	interpro	IPR000716	Thyroglobulin type-1
Q01995	interpro	IPR036872	CH domain superfamily
Q01995	interpro	IPR001715	Calponin homology domain
Q01995	PRINTS	PR00890	Smooth muscle protein 22-alpha (transgelin) signature
Q01995	interpro	IPR000557	Calponin repeat
Q01995	interpro	IPR003096	Smooth muscle protein/calponin
Q01995	interpro	IPR029976	Transgelin
Q99523	interpro	IPR015943	WD40/YVTN repeat-like-containing domain superfamily
Q99523	interpro	IPR031777	Sortilin, C-terminal
Q99523	interpro	IPR031778	Sortilin, N-terminal
Q99523	interpro	IPR006581	VPS10
Q9NP61	interpro	IPR038508	ArfGAP domain superfamily
Q9NP61	interpro	IPR001164	Arf GTPase activating protein
Q9NP61	interpro	IPR037278	ARFGAP/RecO-like zinc finger
P15514	interpro	IPR013032	EGF-like, conserved site
P15514	interpro	IPR000742	EGF-like domain
P15514	interpro	IPR015497	Epidermal growth factor receptor ligand
Q5K651	interpro	IPR001660	Sterile alpha motif domain
Q5K651	CDD	cd09528	SAM_Samd9_Samd9L
Q5K651	interpro	IPR013761	Sterile alpha motif/pointed domain superfamily
Q5K651	interpro	IPR027417	P-loop containing nucleoside triphosphate hydrolase
Q9H0E2	interpro	IPR009060	UBA-like superfamily
Q9H0E2	interpro	IPR037301	Toll-interacting protein, C2 domain
Q9H0E2	interpro	IPR035892	C2 domain superfamily
Q9H0E2	interpro	IPR003892	Ubiquitin system component Cue
Q9H0E2	interpro	IPR000008	C2 domain
Q9H0E2	CDD	cd14363	CUE_TOLIP
Q96HJ9	interpro	IPR037667	Protein FMC1 homologue
Q9NRX6	interpro	IPR009653	Protein kish
P43155	interpro	IPR000542	Acyltransferase ChoActase/COT/CPT
Q13530	interpro	IPR005016	Serine incorporator/TMS membrane protein
Q13530	interpro	IPR029557	Serine incorporator 3
Q9BRP8	interpro	IPR036348	WIBG, N-terminal domain superfamily
Q9BRP8	interpro	IPR015362	WIBG, Mago-binding
Q9BRP8	interpro	IPR039333	Partner of Y14 and mago
P62341	interpro	IPR011893	Selenoprotein, Rdx-type
P62341	interpro	IPR019389	Selenoprotein T
P62341	interpro	IPR036249	Thioredoxin-like superfamily
Q71U36	interpro	IPR036525	Tubulin/FtsZ, GTPase domain superfamily
Q71U36	CDD	cd02186	alpha_tubulin
Q71U36	interpro	IPR003008	Tubulin/FtsZ, GTPase domain
Q71U36	interpro	IPR018316	Tubulin/FtsZ, 2-layer sandwich domain
Q71U36	interpro	IPR008280	Tubulin/FtsZ, C-terminal
Q71U36	interpro	IPR037103	Tubulin/FtsZ, C-terminal domain superfamily
Q71U36	interpro	IPR017975	Tubulin, conserved site
Q71U36	interpro	IPR023123	Tubulin, C-terminal
Q71U36	interpro	IPR002452	Alpha tubulin
Q71U36	interpro	IPR000217	Tubulin
Q8NFF5	interpro	IPR002500	Phosphoadenosine phosphosulphate reductase
Q8NFF5	interpro	IPR001453	MoaB/Mog domain
Q8NFF5	interpro	IPR012183	FAD synthetase with the MoaB/Mog domain
Q8NFF5	interpro	IPR036425	MoaB/Mog-like domain superfamily
Q8NFF5	interpro	IPR014729	Rossmann-like alpha/beta/alpha sandwich fold
Q5VVQ6	interpro	IPR038765	Papain-like cysteine peptidase superfamily
Q5VVQ6	interpro	IPR029071	Ubiquitin-like domain superfamily
Q5VVQ6	interpro	IPR003323	OTU domain
Q5VVQ6	interpro	IPR039138	Ubiquitin thioesterase OTU1
Q5VVQ6	interpro	IPR013087	Zinc finger C2H2-type
P13987	interpro	IPR027101	CD59 glycoprotein
P13987	interpro	IPR016054	Ly-6 antigen/uPA receptor-like
P13987	interpro	IPR018363	CD59 antigen, conserved site
P13987	CDD	cd00117	LU
P28062	interpro	IPR035705	Proteasome subunit beta type 8
P28062	interpro	IPR001353	Proteasome, subunit alpha/beta
P28062	interpro	IPR016050	Proteasome beta-type subunit, conserved site
P28062	interpro	IPR000243	Peptidase T1A, proteasome beta-subunit
P28062	CDD	cd03761	proteasome_beta_type_5
P28062	interpro	IPR029055	Nucleophile aminohydrolases, N-terminal
P28062	interpro	IPR023333	Proteasome B-type subunit
Q9BS40	interpro	IPR009684	Proteinase inhibitor I47, latexin
P27487	interpro	IPR038554	Dipeptidylpeptidase IV, N-terminal domain superfamily
P27487	interpro	IPR001375	Peptidase S9, prolyl oligopeptidase, catalytic domain
P27487	interpro	IPR002469	Dipeptidylpeptidase IV, N-terminal domain
P27487	interpro	IPR002471	Peptidase S9, serine active site
P27487	interpro	IPR029058	Alpha/Beta hydrolase fold
Q6F5E8	interpro	IPR011993	PH-like domain superfamily
Q6F5E8	interpro	IPR029763	F-actin-uncapping protein RLTPR
Q6F5E8	interpro	IPR031943	CARMIL, C-terminal domain
Q6F5E8	interpro	IPR001611	Leucine-rich repeat
Q96DC9	interpro	IPR019400	Peptidase C65, otubain
Q96DC9	interpro	IPR030299	Ubiquitin thioesterase OTUB2
Q96DC9	interpro	IPR038765	Papain-like cysteine peptidase superfamily
Q96DC9	interpro	IPR003323	OTU domain
Q96DC9	interpro	IPR016615	Ubiquitin thioesterase Otubain
Q9NVZ3	interpro	IPR012466	NECAP, PHear domain
Q9NVZ3	interpro	IPR011993	PH-like domain superfamily
Q9Y617	interpro	IPR015424	Pyridoxal phosphate-dependent transferase
Q9Y617	interpro	IPR022278	Phosphoserine aminotransferase
Q9Y617	interpro	IPR000192	Aminotransferase class V domain
Q9Y617	interpro	IPR015421	Pyridoxal phosphate-dependent transferase, major domain
Q9Y617	interpro	IPR020578	Aminotransferase class-V, pyridoxal-phosphate binding site
Q9Y617	interpro	IPR015422	Pyridoxal phosphate-dependent transferase domain 1
Q96RT7	interpro	IPR007259	Gamma-tubulin complex component protein
P61604	interpro	IPR020818	GroES chaperonin family
P61604	interpro	IPR037124	GroES chaperonin superfamily
P61604	interpro	IPR018369	Chaperonin GroES, conserved site
P61604	interpro	IPR011032	GroES-like superfamily
Q5T1J5	ProSiteProfiles	PS51808	Coiled coil-helix-coiled coil-helix (CHCH) domain profile.
P04049	interpro	IPR002219	Protein kinase C-like, phorbol ester/diacylglycerol-binding domain
P04049	interpro	IPR011009	Protein kinase-like domain superfamily
P04049	interpro	IPR003116	Raf-like Ras-binding
P04049	interpro	IPR029071	Ubiquitin-like domain superfamily
P04049	interpro	IPR008271	Serine/threonine-protein kinase, active site
P04049	CDD	cd14149	STKc_C-Raf
P04049	interpro	IPR001245	Serine-threonine/tyrosine-protein kinase, catalytic domain
P04049	interpro	IPR017441	Protein kinase, ATP binding site
P04049	CDD	cd01816	Raf_RBD
P04049	interpro	IPR000719	Protein kinase domain
P04049	interpro	IPR020454	Diacylglycerol/phorbol-ester binding
Q9Y5K6	interpro	IPR001452	SH3 domain
Q9Y5K6	interpro	IPR035776	CD2-associated protein, second SH3 domain
Q9Y5K6	interpro	IPR036028	SH3-like domain superfamily
Q9Y5K6	interpro	IPR028445	CD2-associated protein
Q9Y5K6	interpro	IPR035775	CD2-associated protein, first SH3 domain
Q9Y5K6	interpro	IPR035777	CD2-associated protein, third SH3 domain
P43246	interpro	IPR007696	DNA mismatch repair protein MutS, core
P43246	interpro	IPR007861	DNA mismatch repair protein MutS, clamp
P43246	interpro	IPR000432	DNA mismatch repair protein MutS, C-terminal
P43246	interpro	IPR007695	DNA mismatch repair protein MutS-like, N-terminal
P43246	interpro	IPR036187	DNA mismatch repair protein MutS, core domain superfamily
P43246	CDD	cd03285	ABC_MSH2_euk
P43246	interpro	IPR016151	DNA mismatch repair protein MutS, N-terminal
P43246	interpro	IPR036678	MutS, connector domain superfamily
P43246	interpro	IPR011184	DNA mismatch repair Msh2-type
P43246	interpro	IPR027417	P-loop containing nucleoside triphosphate hydrolase
P43246	interpro	IPR032642	DNA mismatch repair protein Msh2
P43246	interpro	IPR007860	DNA mismatch repair protein MutS, connector domain
Q7Z7A3	interpro	IPR000541	Cytoplasmic tRNA 2-thiolation protein 1
Q7Z7A3	interpro	IPR011063	tRNA(Ile)-lysidine/2-thiocytidine synthase, N-terminal
Q7Z7A3	interpro	IPR014729	Rossmann-like alpha/beta/alpha sandwich fold
Q7Z7A3	interpro	IPR032442	Cytoplasmic tRNA 2-thiolation protein 1, C-terminal
Q7Z7A3	CDD	cd01993	Alpha_ANH_like_II
Q7Z7A3	interpro	IPR035107	tRNA thiolation protein, TtcA/Ctu1 type
Q8IYS1	interpro	IPR036264	Bacterial exopeptidase dimerisation domain
Q8IYS1	interpro	IPR011650	Peptidase M20, dimerisation domain
Q8IYS1	interpro	IPR017144	Peptidase M20A, amidohydrolase, predicted
Q8IYS1	interpro	IPR002933	Peptidase M20
P20248	interpro	IPR036915	Cyclin-like superfamily
P20248	interpro	IPR006671	Cyclin, N-terminal
P20248	interpro	IPR004367	Cyclin, C-terminal domain
P20248	interpro	IPR013763	Cyclin-like
P20248	interpro	IPR039361	Cyclin
P20248	interpro	IPR032447	Cyclin-A, N-terminal
Q96C36	interpro	IPR028939	Pyrroline-5-carboxylate reductase, catalytic, N-terminal
Q96C36	interpro	IPR008927	6-phosphogluconate dehydrogenase-like, C-terminal domain superfamily
Q96C36	interpro	IPR000304	Pyrroline-5-carboxylate reductase
Q96C36	interpro	IPR029036	Pyrroline-5-carboxylate reductase, dimerisation domain
Q96C36	interpro	IPR036291	NAD(P)-binding domain superfamily
P09601	interpro	IPR002051	Haem oxygenase
P09601	interpro	IPR016053	Haem oxygenase-like
P09601	interpro	IPR016084	Haem oxygenase-like, multi-helical
P09601	interpro	IPR018207	Haem oxygenase conserved site
P49748	interpro	IPR006089	Acyl-CoA dehydrogenase, conserved site
P49748	interpro	IPR006091	Acyl-CoA oxidase/dehydrogenase, central domain
P49748	interpro	IPR009075	Acyl-CoA dehydrogenase/oxidase C-terminal
P49748	CDD	cd01161	VLCAD
P49748	interpro	IPR009100	Acyl-CoA dehydrogenase/oxidase, N-terminal and middle domain superfamily
P49748	interpro	IPR013786	Acyl-CoA dehydrogenase/oxidase, N-terminal
P49748	interpro	IPR037069	Acyl-CoA dehydrogenase/oxidase, N-terminal domain superfamily
P49748	interpro	IPR036250	Acyl-CoA dehydrogenase-like, C-terminal
P16219	CDD	cd01158	SCAD_SBCAD
P16219	interpro	IPR006089	Acyl-CoA dehydrogenase, conserved site
P16219	interpro	IPR009075	Acyl-CoA dehydrogenase/oxidase C-terminal
P16219	interpro	IPR036250	Acyl-CoA dehydrogenase-like, C-terminal
P16219	interpro	IPR037069	Acyl-CoA dehydrogenase/oxidase, N-terminal domain superfamily
P16219	interpro	IPR006091	Acyl-CoA oxidase/dehydrogenase, central domain
P16219	interpro	IPR013786	Acyl-CoA dehydrogenase/oxidase, N-terminal
P16219	interpro	IPR009100	Acyl-CoA dehydrogenase/oxidase, N-terminal and middle domain superfamily
P20290	interpro	IPR002715	Nascent polypeptide-associated complex NAC domain
P20290	interpro	IPR038187	NAC A/B domain superfamily
Q8WY22	interpro	IPR033367	BRI3-binding protein
Q8WY22	Pfam	PF14965	Negative regulator of p53/TP53
P49643	interpro	IPR007238	DNA primase large subunit, eukaryotic/archaeal
P49643	interpro	IPR016558	DNA primase, large subunit, eukaryotic
P28562	interpro	IPR036873	Rhodanese-like domain superfamily
P28562	interpro	IPR016130	Protein-tyrosine phosphatase, active site
P28562	interpro	IPR029021	Protein-tyrosine phosphatase-like
P28562	interpro	IPR020422	Dual specificity protein phosphatase domain
P28562	interpro	IPR003595	Protein-tyrosine phosphatase, catalytic
P28562	CDD	cd01446	DSP_MapKP
P28562	interpro	IPR000340	Dual specificity phosphatase, catalytic domain
P28562	interpro	IPR001763	Rhodanese-like domain
P28562	interpro	IPR024950	Dual specificity phosphatase
P28562	interpro	IPR008343	Mitogen-activated protein (MAP) kinase phosphatase
P28562	interpro	IPR020417	Atypical dual specificity phosphatase
P28562	interpro	IPR000387	Tyrosine specific protein phosphatases domain
Q14807	interpro	IPR027417	P-loop containing nucleoside triphosphate hydrolase
Q14807	interpro	IPR036961	Kinesin motor domain superfamily
Q14807	interpro	IPR001752	Kinesin motor domain
Q14807	Pfam	PF12836	Helix-hairpin-helix motif
Q14807	CDD	cd01376	KISc_KID_like
Q14807	interpro	IPR003583	Helix-hairpin-helix DNA-binding motif, class 1
Q14807	interpro	IPR026986	Kinesin-like protein KIF22 (Kid)
Q14807	interpro	IPR019821	Kinesin motor domain, conserved site
Q14807	interpro	IPR010994	RuvA domain 2-like
Q14807	interpro	IPR027640	Kinesin-like protein
Q9Y421	interpro	IPR013865	Protein of unknown function DUF1754, eukaryotic
Q658P3	interpro	IPR036291	NAD(P)-binding domain superfamily
Q658P3	interpro	IPR013130	Ferric reductase transmembrane component-like domain
Q658P3	interpro	IPR028939	Pyrroline-5-carboxylate reductase, catalytic, N-terminal
Q15334	interpro	IPR001680	WD40 repeat
Q15334	interpro	IPR000664	Lethal(2) giant larvae protein
Q15334	interpro	IPR015943	WD40/YVTN repeat-like-containing domain superfamily
Q15334	interpro	IPR036322	WD40-repeat-containing domain superfamily
Q15334	interpro	IPR013577	Lethal giant larvae homologue 2
Q15334	interpro	IPR019775	WD40 repeat, conserved site
Q9H5V9	interpro	IPR029704	UPF0428 family
Q99986	CDD	cd14122	STKc_VRK1
Q99986	interpro	IPR017441	Protein kinase, ATP binding site
Q99986	interpro	IPR008271	Serine/threonine-protein kinase, active site
Q99986	interpro	IPR000719	Protein kinase domain
Q99986	interpro	IPR011009	Protein kinase-like domain superfamily
Q9NVP1	interpro	IPR011545	DEAD/DEAH box helicase domain
Q9NVP1	interpro	IPR001650	Helicase, C-terminal
Q9NVP1	interpro	IPR014014	RNA helicase, DEAD-box type, Q motif
Q9NVP1	interpro	IPR025313	Domain of unknown function DUF4217
Q9NVP1	interpro	IPR014001	Helicase superfamily 1/2, ATP-binding domain
Q9NVP1	CDD	cd00268	DEADc
Q9NVP1	interpro	IPR027417	P-loop containing nucleoside triphosphate hydrolase
Q9NVP1	interpro	IPR000629	ATP-dependent RNA helicase DEAD-box, conserved site
Q15758	interpro	IPR036458	Sodium:dicarboxylate symporter superfamily
Q15758	interpro	IPR018107	Sodium:dicarboxylate symporter, conserved site
Q15758	PRINTS	PR00173	Glutamate-aspartate symporter signature
Q15758	interpro	IPR001991	Sodium:dicarboxylate symporter
P46734	interpro	IPR000719	Protein kinase domain
P46734	CDD	cd06617	PKc_MKK3_6
P46734	interpro	IPR017441	Protein kinase, ATP binding site
P46734	interpro	IPR008271	Serine/threonine-protein kinase, active site
P46734	interpro	IPR011009	Protein kinase-like domain superfamily
P17026	interpro	IPR013087	Zinc finger C2H2-type
P17026	interpro	IPR036236	Zinc finger C2H2 superfamily
P17026	Pfam	PF00096	Zinc finger, C2H2 type
P84022	interpro	IPR036578	SMAD MH1 domain superfamily
P84022	CDD	cd10985	MH2_SMAD_2_3
P84022	interpro	IPR013790	Dwarfin
P84022	interpro	IPR013019	MAD homology, MH1
P84022	CDD	cd10491	MH1_SMAD_2_3
P84022	interpro	IPR017855	SMAD-like domain superfamily
P84022	interpro	IPR001132	SMAD domain, Dwarfin-type
P84022	interpro	IPR003619	MAD homology 1, Dwarfin-type
P84022	interpro	IPR008984	SMAD/FHA domain superfamily
P11908	interpro	IPR005946	Ribose-phosphate pyrophosphokinase
P11908	interpro	IPR037515	Ribose-phosphate pyrophosphokinase, bacterial-type
P11908	interpro	IPR029057	Phosphoribosyltransferase-like
P11908	interpro	IPR000836	Phosphoribosyltransferase domain
P11908	interpro	IPR000842	Phosphoribosyl pyrophosphate synthetase, conserved site
P11908	interpro	IPR029099	Ribose-phosphate pyrophosphokinase, N-terminal domain
Q9BZM4	interpro	IPR037055	MHC class I-like antigen recognition-like superfamily
Q9BZM4	interpro	IPR011161	MHC class I-like antigen recognition-like
Q9BZM4	interpro	IPR011162	MHC classes I/II-like antigen recognition protein
Q8WUQ7	interpro	IPR018816	Cactin, central domain
Q8WUQ7	interpro	IPR019134	Cactin, C-terminal
Q9ULH1	interpro	IPR037278	ARFGAP/RecO-like zinc finger
Q9ULH1	interpro	IPR020683	Ankyrin repeat-containing domain
Q9ULH1	Pfam	PF16746	BAR domain of APPL family
Q9ULH1	interpro	IPR001164	Arf GTPase activating protein
Q9ULH1	interpro	IPR002110	Ankyrin repeat
Q9ULH1	interpro	IPR001452	SH3 domain
Q9ULH1	interpro	IPR011993	PH-like domain superfamily
Q9ULH1	interpro	IPR038508	ArfGAP domain superfamily
Q9ULH1	interpro	IPR001849	Pleckstrin homology domain
Q9ULH1	interpro	IPR038016	ASAP1, SH3 domain
Q9ULH1	interpro	IPR036770	Ankyrin repeat-containing domain superfamily
Q9ULH1	interpro	IPR027267	AH/BAR domain superfamily
Q9ULH1	interpro	IPR037928	ASAP1, BAR domain
Q9ULH1	interpro	IPR036028	SH3-like domain superfamily
Q9ULH1	interpro	IPR037844	ASAP, PH domain
Q9H9Y2	interpro	IPR007109	Brix domain
Q8NBI5	interpro	IPR036259	MFS transporter superfamily
Q8NBI5	interpro	IPR027197	Solute carrier family 43 member 3
Q8NBI5	interpro	IPR011701	Major facilitator superfamily
P55160	interpro	IPR019137	Nck-associated protein 1
P26358	interpro	IPR001525	C-5 cytosine methyltransferase
P26358	interpro	IPR017198	DNA (cytosine-5)-methyltransferase 1-like
P26358	interpro	IPR002857	Zinc finger, CXXC-type
P26358	interpro	IPR029063	S-adenosyl-L-methionine-dependent methyltransferase
P26358	interpro	IPR018117	DNA methylase, C-5 cytosine-specific, active site
P26358	interpro	IPR031303	DNA methylase, C-5 cytosine-specific, conserved site
P26358	interpro	IPR010506	DMAP1-binding domain
P26358	CDD	cd04711	BAH_Dnmt1_II
P26358	CDD	cd04760	BAH_Dnmt1_I
P26358	interpro	IPR001025	Bromo adjacent homology (BAH) domain
P26358	interpro	IPR022702	DNA (cytosine-5)-methyltransferase 1, replication foci domain
Q13185	interpro	IPR016197	Chromo-like domain superfamily
Q13185	interpro	IPR017984	Chromo domain subgroup
Q13185	interpro	IPR023779	Chromo domain, conserved site
Q13185	interpro	IPR000953	Chromo/chromo shadow domain
Q13185	interpro	IPR023780	Chromo domain
Q13185	CDD	cd00034	ChSh
Q13185	interpro	IPR008251	Chromo shadow domain
Q13185	interpro	IPR038033	Chromobox protein homologue 3
O94952	interpro	IPR011722	Hemimethylated DNA-binding domain
O94952	interpro	IPR036623	Hemimethylated DNA-binding domain superfamily
O94952	interpro	IPR032698	Protein SirB1, N-terminal
O94952	interpro	IPR036047	F-box-like domain superfamily
Q0VDF9	interpro	IPR013126	Heat shock protein 70 family
Q0VDF9	interpro	IPR018181	Heat shock protein 70, conserved site
Q0VDF9	CDD	cd10238	HSPA14-like_NBD
Q0VDF9	interpro	IPR029047	Heat shock protein 70kD, peptide-binding domain superfamily
P49761	interpro	IPR011009	Protein kinase-like domain superfamily
P49761	CDD	cd14214	PKc_CLK3
P49761	interpro	IPR000719	Protein kinase domain
P49761	interpro	IPR008271	Serine/threonine-protein kinase, active site
P49761	interpro	IPR017441	Protein kinase, ATP binding site
Q8NBJ7	interpro	IPR005532	Sulfatase-modifying factor enzyme
Q8NBJ7	interpro	IPR016187	C-type lectin fold
Q00059	CDD	cd01390	HMGB-UBF_HMG-box
Q00059	interpro	IPR036910	High mobility group box domain superfamily
Q00059	interpro	IPR009071	High mobility group box domain
O43633	interpro	IPR005024	Snf7 family
P37235	interpro	IPR018247	EF-Hand 1, calcium-binding site
P37235	PRINTS	PR00450	Recoverin family signature
P37235	interpro	IPR002048	EF-hand domain
P37235	interpro	IPR011992	EF-hand domain pair
Q13472	interpro	IPR013497	DNA topoisomerase, type IA, central
Q13472	interpro	IPR023406	DNA topoisomerase, type IA, active site
Q13472	interpro	IPR013824	DNA topoisomerase, type IA, central region, subdomain 1
Q13472	interpro	IPR034144	DNA topoisomerase 3-like, TOPRIM domain
Q13472	interpro	IPR023405	DNA topoisomerase, type IA, core domain
Q13472	interpro	IPR013826	DNA topoisomerase, type IA, central region, subdomain 3
Q13472	interpro	IPR013498	DNA topoisomerase, type IA, zn finger
Q13472	interpro	IPR006171	TOPRIM domain
Q13472	interpro	IPR003601	DNA topoisomerase, type IA, domain 2
Q13472	interpro	IPR003602	DNA topoisomerase, type IA, DNA-binding domain
Q13472	interpro	IPR000380	DNA topoisomerase, type IA
Q13472	interpro	IPR013825	DNA topoisomerase, type IA, central region, subdomain 2
Q13472	interpro	IPR010666	Zinc finger, GRF-type
P24821	interpro	IPR013111	EGF-like domain, extracellular
P24821	interpro	IPR003961	Fibronectin type III
P24821	interpro	IPR013032	EGF-like, conserved site
P24821	interpro	IPR013783	Immunoglobulin-like fold
P24821	CDD	cd00054	EGF_CA
P24821	interpro	IPR036116	Fibronectin type III superfamily
P24821	interpro	IPR033078	Tenascin-C
P24821	CDD	cd00055	EGF_Lam
P24821	interpro	IPR002181	Fibrinogen, alpha/beta/gamma chain, C-terminal globular domain
P24821	ProDom	PD936484	POLYPROTEIN GLYCOPROTEIN M G2 TRANSMEMBRANE NONSTRUCTURAL MEMBRANE CONTAINS: PRECURSOR SIGNAL
P24821	interpro	IPR000742	EGF-like domain
P24821	interpro	IPR036056	Fibrinogen-like, C-terminal
Q9GZL7	interpro	IPR001680	WD40 repeat
Q9GZL7	interpro	IPR017986	WD40-repeat-containing domain
Q9GZL7	interpro	IPR019775	WD40 repeat, conserved site
Q9GZL7	interpro	IPR015943	WD40/YVTN repeat-like-containing domain superfamily
Q9GZL7	interpro	IPR028599	WD repeat WDR12/Ytm1
Q9GZL7	interpro	IPR012972	NLE
Q9GZL7	interpro	IPR020472	G-protein beta WD-40 repeat
Q9GZL7	CDD	cd00200	WD40
Q9GZL7	interpro	IPR036322	WD40-repeat-containing domain superfamily
Q96DG6	interpro	IPR002925	Dienelactone hydrolase
Q96DG6	interpro	IPR029058	Alpha/Beta hydrolase fold
Q13526	interpro	IPR001202	WW domain
Q13526	interpro	IPR000297	Peptidyl-prolyl cis-trans isomerase, PpiC-type
Q13526	interpro	IPR023058	Peptidyl-prolyl cis-trans isomerase, PpiC-type, conserved site
Q13526	interpro	IPR036020	WW domain superfamily
P78540	interpro	IPR020855	Ureohydrolase, manganese-binding site
P78540	interpro	IPR014033	Arginase
P78540	CDD	cd09989	Arginase
P78540	interpro	IPR006035	Ureohydrolase
P78540	interpro	IPR023696	Ureohydrolase domain superfamily
P63146	interpro	IPR000608	Ubiquitin-conjugating enzyme E2
P63146	interpro	IPR023313	Ubiquitin-conjugating enzyme, active site
P63146	interpro	IPR016135	Ubiquitin-conjugating enzyme/RWD-like
Q8NAB2	CDD	cd14735	BACK_Kelch
Q8NAB2	interpro	IPR000210	BTB/POZ domain
Q8NAB2	interpro	IPR011705	BTB/Kelch-associated
Q8NAB2	interpro	IPR015915	Kelch-type beta propeller
Q8NAB2	interpro	IPR017096	BTB-kelch protein
Q8NAB2	interpro	IPR011333	SKP1/BTB/POZ domain superfamily
Q8NAB2	interpro	IPR006652	Kelch repeat type 1
Q9UIV1	interpro	IPR006941	Ribonuclease CAF1
Q9UIV1	interpro	IPR036397	Ribonuclease H superfamily
Q9UIV1	interpro	IPR012337	Ribonuclease H-like superfamily
Q01973	interpro	IPR013783	Immunoglobulin-like fold
Q01973	PRINTS	PR00018	Kringle domain signature
Q01973	interpro	IPR038178	Kringle superfamily
Q01973	interpro	IPR000719	Protein kinase domain
Q01973	interpro	IPR011009	Protein kinase-like domain superfamily
Q01973	interpro	IPR003598	Immunoglobulin subtype 2
Q01973	interpro	IPR000001	Kringle
Q01973	CDD	cd00096	Ig
Q01973	interpro	IPR020067	Frizzled domain
Q01973	interpro	IPR016247	Tyrosine-protein kinase, receptor ROR
Q01973	interpro	IPR036790	Frizzled cysteine-rich domain superfamily
Q01973	interpro	IPR008266	Tyrosine-protein kinase, active site
Q01973	interpro	IPR003599	Immunoglobulin subtype
Q01973	interpro	IPR001245	Serine-threonine/tyrosine-protein kinase, catalytic domain
Q01973	interpro	IPR013806	Kringle-like fold
Q01973	interpro	IPR013098	Immunoglobulin I-set
Q01973	CDD	cd07467	CRD_TK_ROR1
Q01973	interpro	IPR036179	Immunoglobulin-like domain superfamily
Q01973	interpro	IPR018056	Kringle, conserved site
Q01973	interpro	IPR007110	Immunoglobulin-like domain
Q01973	CDD	cd05090	PTKc_Ror1
O14678	CDD	cd03223	ABCD_peroxisomal_ALDP
O14678	interpro	IPR011527	ABC transporter type 1, transmembrane domain
O14678	interpro	IPR036640	ABC transporter type 1, transmembrane domain superfamily
O14678	interpro	IPR017871	ABC transporter, conserved site
O14678	interpro	IPR003439	ABC transporter-like
O14678	interpro	IPR027417	P-loop containing nucleoside triphosphate hydrolase
O14678	interpro	IPR003593	AAA+ ATPase domain
Q9Y3B9	interpro	IPR012459	Ribosomal RNA-processing protein 15
O15347	interpro	IPR036910	High mobility group box domain superfamily
O15347	interpro	IPR009071	High mobility group box domain
O15347	interpro	IPR017967	HMG box A DNA-binding domain, conserved site
O15347	CDD	cd01390	HMGB-UBF_HMG-box
O15347	interpro	IPR031077	High mobility group protein HMGB3
O15347	PRINTS	PR00886	High mobility group (HMG1/HMG2) protein signature
Q9UN76	interpro	IPR000175	Sodium:neurotransmitter symporter
Q9UN76	interpro	IPR037272	Sodium:neurotransmitter symporter superfamily
Q9UN76	CDD	cd11501	SLC6sbd_ATB0
Q9Y244	Pfam	PF05348	Proteasome maturation factor UMP1
Q9Y244	interpro	IPR008012	Proteasome maturation factor Ump1
P12235	interpro	IPR023395	Mitochondrial carrier domain superfamily
P12235	interpro	IPR002113	Adenine nucleotide translocator 1
P12235	interpro	IPR018108	Mitochondrial substrate/solute carrier
P12235	interpro	IPR002067	Mitochondrial carrier protein
Q99880	interpro	IPR000558	Histone H2B
Q99880	interpro	IPR009072	Histone-fold
Q99880	interpro	IPR007125	Histone H2A/H2B/H3
O75691	interpro	IPR016024	Armadillo-type fold
O75691	interpro	IPR011430	Down-regulated-in-metastasis protein
Q9NQZ2	interpro	IPR018972	Sas10 C-terminal domain
Q9NQZ2	interpro	IPR007146	Sas10/Utp3/C1D
Q99717	interpro	IPR036578	SMAD MH1 domain superfamily
Q99717	interpro	IPR013019	MAD homology, MH1
Q99717	interpro	IPR008984	SMAD/FHA domain superfamily
Q99717	interpro	IPR017855	SMAD-like domain superfamily
Q99717	CDD	cd10497	MH2_SMAD_1_5_9
Q99717	interpro	IPR003619	MAD homology 1, Dwarfin-type
Q99717	interpro	IPR001132	SMAD domain, Dwarfin-type
Q99717	CDD	cd10490	MH1_SMAD_1_5_9
Q99717	interpro	IPR013790	Dwarfin
Q96ST2	interpro	IPR035441	TFIIS/LEDGF domain superfamily
Q96ST2	interpro	IPR017923	Transcription factor IIS, N-terminal
O00483	interpro	IPR010530	NADH-ubiquinone reductase complex 1 MLRQ subunit
Q15397	interpro	IPR001313	Pumilio RNA-binding repeat
Q15397	interpro	IPR012959	CPL domain
Q15397	interpro	IPR016024	Armadillo-type fold
Q15397	interpro	IPR033133	Pumilio homology domain
Q15397	interpro	IPR011989	Armadillo-like helical
Q9H3G5	interpro	IPR001563	Peptidase S10, serine carboxypeptidase
Q9H3G5	interpro	IPR018202	Serine carboxypeptidase, serine active site
Q9H3G5	interpro	IPR029058	Alpha/Beta hydrolase fold
Q9UBT7	interpro	IPR030045	Alpha-catulin 1
Q9UBT7	interpro	IPR036723	Alpha-catenin/vinculin-like superfamily
Q9UBT7	interpro	IPR006077	Vinculin/alpha-catenin
Q9UBT7	interpro	IPR001033	Alpha-catenin
Q13057	interpro	IPR001977	Dephospho-CoA kinase
Q13057	CDD	cd02164	PPAT_CoAS
Q13057	interpro	IPR004821	Cytidyltransferase-like domain
Q13057	interpro	IPR027417	P-loop containing nucleoside triphosphate hydrolase
Q13057	interpro	IPR014729	Rossmann-like alpha/beta/alpha sandwich fold
Q9BVP2	interpro	IPR027417	P-loop containing nucleoside triphosphate hydrolase
Q9BVP2	interpro	IPR006073	GTP binding domain
Q9BVP2	interpro	IPR030378	Circularly permuted (CP)-type guanine nucleotide-binding (G) domain
Q9BVP2	interpro	IPR014813	Guanine nucleotide-binding protein-like 3, N-terminal domain
Q9BVP2	CDD	cd04178	Nucleostemin_like
P05386	Pfam	PF00428	60s Acidic ribosomal protein
P05386	CDD	cd05831	Ribosomal_P1
P05386	interpro	IPR027534	Ribosomal protein L12 family
P05386	interpro	IPR038716	Ribosomal protein P1/P2, N-terminal domain
P35625	CDD	cd03585	NTR_TIMP
P35625	interpro	IPR001134	Netrin domain
P35625	interpro	IPR001820	Protease inhibitor I35 (TIMP)
P35625	interpro	IPR030490	Tissue inhibitor of metalloproteinase, conserved site
P35625	interpro	IPR027465	Proteinase inhibitor I35b (TIMP), C-terminal
P35625	interpro	IPR015612	Metalloproteinase inhibitor 3
P35625	interpro	IPR008993	Tissue inhibitor of metalloproteinases-like, OB-fold
P14635	interpro	IPR004367	Cyclin, C-terminal domain
P14635	interpro	IPR039361	Cyclin
P14635	interpro	IPR006671	Cyclin, N-terminal
P14635	interpro	IPR036915	Cyclin-like superfamily
P14635	interpro	IPR013763	Cyclin-like
P29317	interpro	IPR001090	Ephrin receptor ligand binding domain
P29317	interpro	IPR016257	Ephrin receptor type-A /type-B
P29317	interpro	IPR011641	Tyrosine-protein kinase ephrin type A/B receptor-like
P29317	interpro	IPR000719	Protein kinase domain
P29317	interpro	IPR001426	Tyrosine-protein kinase, receptor class V, conserved site
P29317	interpro	IPR027936	Ephrin receptor, transmembrane domain
P29317	interpro	IPR008266	Tyrosine-protein kinase, active site
P29317	interpro	IPR003961	Fibronectin type III
P29317	interpro	IPR009030	Growth factor receptor cysteine-rich domain superfamily
P29317	interpro	IPR034263	Ephrin type-A receptor 2, ligand binding domain
P29317	interpro	IPR001245	Serine-threonine/tyrosine-protein kinase, catalytic domain
P29317	interpro	IPR008979	Galactose-binding-like domain superfamily
P29317	interpro	IPR036116	Fibronectin type III superfamily
P29317	interpro	IPR001660	Sterile alpha motif domain
P29317	interpro	IPR013783	Immunoglobulin-like fold
P29317	interpro	IPR017441	Protein kinase, ATP binding site
P29317	interpro	IPR013761	Sterile alpha motif/pointed domain superfamily
P29317	interpro	IPR011009	Protein kinase-like domain superfamily
P29317	interpro	IPR020635	Tyrosine-protein kinase, catalytic domain
P29317	CDD	cd09543	SAM_EPH-A2
P29317	CDD	cd05063	PTKc_EphR_A2
Q96CX2	interpro	IPR000210	BTB/POZ domain
Q96CX2	interpro	IPR003131	Potassium channel tetramerisation-type BTB domain
Q96CX2	interpro	IPR011333	SKP1/BTB/POZ domain superfamily
Q86YN1	interpro	IPR036938	Phosphatidic acid phosphatase type 2/haloperoxidase superfamily
Q86YN1	interpro	IPR000326	Phosphatidic acid phosphatase type 2/haloperoxidase
Q86YN1	CDD	cd03382	PAP2_dolichyldiphosphatase
Q11128	interpro	IPR001503	Glycosyl transferase family 10
Q11128	interpro	IPR038577	GT10-like superfamily
Q11128	interpro	IPR031481	Fucosyltransferase, N-terminal
Q99543	interpro	IPR001623	DnaJ domain
Q99543	interpro	IPR001005	SANT/Myb domain
Q99543	interpro	IPR036869	Chaperone J-domain superfamily
Q99543	interpro	IPR017884	SANT domain
Q99543	interpro	IPR018253	DnaJ domain, conserved site
Q99543	interpro	IPR032003	Ribosome-associated complex head domain
Q99543	interpro	IPR009057	Homeobox-like domain superfamily
Q8N488	interpro	IPR036443	Zinc finger, RanBP2-type superfamily
Q8N488	interpro	IPR001876	Zinc finger, RanBP2-type
Q8N488	interpro	IPR033774	Yaf2/RYBP C-terminal binding motif
Q330K2	interpro	IPR002060	Squalene/phytoene synthase
Q330K2	interpro	IPR008949	Isoprenoid synthase domain superfamily
Q9NRZ9	interpro	IPR001650	Helicase, C-terminal
Q9NRZ9	interpro	IPR000330	SNF2-related, N-terminal domain
Q9NRZ9	interpro	IPR014001	Helicase superfamily 1/2, ATP-binding domain
Q9NRZ9	interpro	IPR038718	SNF2-like, N-terminal domain superfamily
Q9NRZ9	interpro	IPR027417	P-loop containing nucleoside triphosphate hydrolase
Q9NRZ9	CDD	cd00046	DEXDc
P33316	interpro	IPR036157	dUTPase-like superfamily
P33316	interpro	IPR029054	dUTPase-like
P33316	interpro	IPR033704	dUTPase, trimeric
P33316	interpro	IPR008181	Deoxyuridine triphosphate nucleotidohydrolase
P61218	interpro	IPR028363	DNA-directed RNA polymerase, subunit RPB6
P61218	interpro	IPR020708	DNA-directed RNA polymerase, 14-18kDa subunit, conserved site
P61218	interpro	IPR006110	RNA polymerase, subunit omega/K/RPB6
P61218	interpro	IPR036161	RPB6/omega subunit-like superfamily
P61218	interpro	IPR012293	RNA polymerase subunit, RPB6/omega
P61218	interpro	IPR006111	Archaeal RpoK/eukaryotic RPB6 RNA polymerase subunit
Q9BRS2	interpro	IPR018935	RIO kinase, conserved site
Q9BRS2	interpro	IPR017407	Serine/threonine-protein kinase Rio1
Q9BRS2	Pfam	PF01163	RIO1 family
Q9BRS2	interpro	IPR000687	RIO kinase
Q9BRS2	CDD	cd05147	RIO1_euk
Q9BRS2	interpro	IPR011009	Protein kinase-like domain superfamily
P18085	interpro	IPR005225	Small GTP-binding protein domain
P18085	interpro	IPR024156	Small GTPase superfamily, ARF type
P18085	interpro	IPR027417	P-loop containing nucleoside triphosphate hydrolase
P18085	interpro	IPR006689	Small GTPase superfamily, ARF/SAR type
P18085	CDD	cd04150	Arf1_5_like
Q9NV31	interpro	IPR002942	RNA-binding S4 domain
Q9NV31	interpro	IPR022801	Ribosomal protein S4/S9
Q9NV31	interpro	IPR036986	RNA-binding S4 domain superfamily
Q9NV31	interpro	IPR001912	Ribosomal protein S4/S9, N-terminal
Q9NZJ9	interpro	IPR000086	NUDIX hydrolase domain
Q9NZJ9	CDD	cd04666	Nudix_Hydrolase_9
Q9NZJ9	interpro	IPR020084	NUDIX hydrolase, conserved site
Q9NZJ9	interpro	IPR015797	NUDIX hydrolase-like domain superfamily
P57764	interpro	IPR007677	Gasdermin
Q8IVL1	CDD	cd00009	AAA
Q8IVL1	interpro	IPR036872	CH domain superfamily
Q8IVL1	interpro	IPR001715	Calponin homology domain
Q8IVL1	interpro	IPR027417	P-loop containing nucleoside triphosphate hydrolase
Q8IVL1	interpro	IPR003593	AAA+ ATPase domain
Q8IVL1	interpro	IPR039041	Nav/unc-53 family
O15116	interpro	IPR001163	LSM domain, eukaryotic/archaea-type
O15116	interpro	IPR010920	LSM domain superfamily
O15116	interpro	IPR034104	Sm-like protein Lsm1
Q6P9A2	interpro	IPR029044	Nucleotide-diphospho-sugar transferases
Q6P9A2	interpro	IPR035992	Ricin B-like lectins
Q6P9A2	CDD	cd02510	pp-GalNAc-T
Q6P9A2	interpro	IPR000772	Ricin B, lectin domain
Q6P9A2	interpro	IPR001173	Glycosyltransferase 2-like
Q8NFP9	interpro	IPR016024	Armadillo-type fold
Q8NFP9	interpro	IPR000409	BEACH domain
Q8NFP9	ProDom	PD329443	REPEAT WD NEUROBEACHIN MEMBRANE LBA BEIGE-LIKE SPLICING ALTERNATIVE 3D-STRUCTURE TRAFFICKING
Q8NFP9	interpro	IPR023362	PH-BEACH domain
Q8NFP9	interpro	IPR017986	WD40-repeat-containing domain
Q8NFP9	Pfam	PF13385	Concanavalin A-like lectin/glucanases superfamily
Q8NFP9	interpro	IPR013320	Concanavalin A-like lectin/glucanase domain superfamily
Q8NFP9	interpro	IPR031570	Domain of unknown function DUF4704
Q8NFP9	interpro	IPR036372	BEACH domain superfamily
Q8NFP9	interpro	IPR001680	WD40 repeat
Q8NFP9	interpro	IPR036322	WD40-repeat-containing domain superfamily
Q8NFP9	interpro	IPR010508	Domain of unknown function DUF1088
O60675	interpro	IPR028574	Transcription factor MafK
O60675	interpro	IPR004827	Basic-leucine zipper domain
O60675	CDD	cd14717	bZIP_Maf_small
O60675	interpro	IPR004826	Basic leucine zipper domain, Maf-type
O60675	interpro	IPR008917	Transcription factor, Skn-1-like, DNA-binding domain superfamily
O60675	interpro	IPR024874	Transcription factor Maf family
P53350	interpro	IPR000959	POLO box domain
P53350	interpro	IPR033702	Polo-like kinase 1, catalytic domain
P53350	interpro	IPR008271	Serine/threonine-protein kinase, active site
P53350	interpro	IPR000719	Protein kinase domain
P53350	interpro	IPR017441	Protein kinase, ATP binding site
P53350	interpro	IPR036947	POLO box domain superfamily
P53350	interpro	IPR011009	Protein kinase-like domain superfamily
P53350	interpro	IPR033695	Second polo-box domain
P53350	interpro	IPR033701	First polo-box domain
Q9Y5V0	interpro	IPR026939	At2g23090-like
Q9Y5V0	interpro	IPR007513	Uncharacterised protein family SERF
Q9Y5V0	Pfam	PF12874	Zinc-finger of C2H2 type
P62805	interpro	IPR001951	Histone H4
P62805	interpro	IPR019809	Histone H4, conserved site
P62805	interpro	IPR009072	Histone-fold
P62805	interpro	IPR035425	CENP-T/Histone H4, histone fold
P62805	interpro	IPR004823	TATA box binding protein associated factor (TAF)
Q71DI3	interpro	IPR009072	Histone-fold
Q71DI3	interpro	IPR007125	Histone H2A/H2B/H3
Q71DI3	interpro	IPR000164	Histone H3/CENP-A
O60870	interpro	IPR038254	KIN17, WH-like domain superfamily
O60870	interpro	IPR036236	Zinc finger C2H2 superfamily
O60870	interpro	IPR019447	DNA/RNA-binding protein Kin17, conserved domain
O60870	interpro	IPR037321	KIN17-like protein
O60870	interpro	IPR014722	Ribosomal protein L2, domain 2
O60870	CDD	cd13155	KOW_KIN17
P07305	interpro	IPR005818	Linker histone H1/H5, domain H15
P07305	interpro	IPR036390	Winged helix DNA-binding domain superfamily
P07305	interpro	IPR036388	Winged helix-like DNA-binding domain superfamily
P07305	interpro	IPR005819	Histone H5
Q99848	interpro	IPR008610	Eukaryotic rRNA processing
Q8IYL3	interpro	IPR031530	UPF0688 family
Q9BX40	interpro	IPR010920	LSM domain superfamily
Q9BX40	interpro	IPR025609	Lsm14-like, N-terminal
Q9BX40	interpro	IPR025761	FFD box
Q9BX40	interpro	IPR025762	DFDF domain
Q9BX40	interpro	IPR019050	FDF domain
Q9BX40	interpro	IPR025768	TFG box
Q9BV57	interpro	IPR027496	1,2-dihydroxy-3-keto-5-methylthiopentene dioxygenase, eukaryotes
Q9BV57	interpro	IPR011051	RmlC-like cupin domain superfamily
Q9BV57	interpro	IPR004313	Acireductone dioxygenase ARD family
Q9BV57	interpro	IPR014710	RmlC-like jelly roll fold
A6NHL2	interpro	IPR008280	Tubulin/FtsZ, C-terminal
A6NHL2	interpro	IPR002452	Alpha tubulin
A6NHL2	interpro	IPR003008	Tubulin/FtsZ, GTPase domain
A6NHL2	interpro	IPR000217	Tubulin
A6NHL2	interpro	IPR037103	Tubulin/FtsZ, C-terminal domain superfamily
A6NHL2	interpro	IPR017975	Tubulin, conserved site
A6NHL2	CDD	cd02186	alpha_tubulin
A6NHL2	interpro	IPR018316	Tubulin/FtsZ, 2-layer sandwich domain
A6NHL2	interpro	IPR023123	Tubulin, C-terminal
A6NHL2	interpro	IPR036525	Tubulin/FtsZ, GTPase domain superfamily
Q99933	interpro	IPR000626	Ubiquitin domain
Q99933	interpro	IPR036533	BAG domain superfamily
Q99933	interpro	IPR003103	BAG domain
Q99933	CDD	cd01812	BAG1_N
Q99933	interpro	IPR017093	Molecular chaperone regulator BAG-1
Q99933	interpro	IPR029071	Ubiquitin-like domain superfamily
Q8WUW1	interpro	IPR033378	Protein BRICK1
Q9Y3E7	interpro	IPR005024	Snf7 family
Q9NR30	CDD	cd12936	GUCT_RHII_Gualpha_beta
Q9NR30	interpro	IPR001650	Helicase, C-terminal
Q9NR30	interpro	IPR014014	RNA helicase, DEAD-box type, Q motif
Q9NR30	interpro	IPR012562	GUCT
Q9NR30	interpro	IPR035979	RNA-binding domain superfamily
Q9NR30	interpro	IPR027417	P-loop containing nucleoside triphosphate hydrolase
Q9NR30	interpro	IPR014001	Helicase superfamily 1/2, ATP-binding domain
Q9NR30	CDD	cd00268	DEADc
Q9NR30	interpro	IPR011545	DEAD/DEAH box helicase domain
Q6UWP2	CDD	cd05343	Mgc4172-like_SDR_c
Q6UWP2	interpro	IPR020904	Short-chain dehydrogenase/reductase, conserved site
Q6UWP2	interpro	IPR036291	NAD(P)-binding domain superfamily
Q6UWP2	interpro	IPR002347	Short-chain dehydrogenase/reductase SDR
Q9Y6E2	interpro	IPR003307	W2 domain
Q9Y6E2	CDD	cd11560	W2_eIF5C_like
Q9Y6E2	interpro	IPR016024	Armadillo-type fold
Q9Y6E2	interpro	IPR016021	MIF4G-like domain superfamily
Q6DN03	interpro	IPR009072	Histone-fold
Q6DN03	interpro	IPR000558	Histone H2B
Q6DN03	interpro	IPR007125	Histone H2A/H2B/H3
Q9BWE0	interpro	IPR013087	Zinc finger C2H2-type
Q9BWE0	interpro	IPR036236	Zinc finger C2H2 superfamily
Q9BWE0	Pfam	PF00096	Zinc finger, C2H2 type
P49759	interpro	IPR000719	Protein kinase domain
P49759	interpro	IPR008271	Serine/threonine-protein kinase, active site
P49759	interpro	IPR011009	Protein kinase-like domain superfamily
P49759	CDD	cd14213	PKc_CLK1_4
P49759	interpro	IPR017441	Protein kinase, ATP binding site
Q9UNQ2	interpro	IPR001737	Ribosomal RNA adenine methyltransferase KsgA/Erm
Q9UNQ2	CDD	cd02440	AdoMet_MTases
Q9UNQ2	interpro	IPR011530	Ribosomal RNA adenine dimethylase
Q9UNQ2	interpro	IPR029063	S-adenosyl-L-methionine-dependent methyltransferase
Q9UNQ2	interpro	IPR020596	Ribosomal RNA adenine methylase transferase, conserved site
Q9UNQ2	interpro	IPR020598	Ribosomal RNA adenine methylase transferase, N-terminal
Q92766	interpro	IPR036236	Zinc finger C2H2 superfamily
Q92766	interpro	IPR013087	Zinc finger C2H2-type
Q92766	Pfam	PF13909	C2H2-type zinc-finger domain
Q92766	Pfam	PF00096	Zinc finger, C2H2 type
Q92766	Pfam	PF13912	C2H2-type zinc finger
Q9Y2Z9	interpro	IPR036188	FAD/NAD(P)-binding domain superfamily
Q9Y2Z9	interpro	IPR002938	FAD-binding domain
Q9Y2Z9	PRINTS	PR00420	Aromatic-ring hydroxylase (flavoprotein monooxygenase) signature
Q9Y2Z9	interpro	IPR010971	Ubiquinone biosynthesis hydroxylase UbiH/COQ6
Q9Y2Z9	interpro	IPR018168	Ubiquinone biosynthesis hydroxylase, UbiH/UbiF/VisC/COQ6, conserved site
Q9Y2Z9	interpro	IPR000689	Ubiquinone biosynthesis monooxygenase COQ6
Q9BQG0	interpro	IPR007015	DNA polymerase V
Q9BQG0	interpro	IPR016024	Armadillo-type fold
Q92688	interpro	IPR001611	Leucine-rich repeat
Q92688	Pfam	PF14580	Leucine-rich repeat
Q92688	interpro	IPR032675	Leucine-rich repeat domain superfamily
Q92688	interpro	IPR003603	U2A'/phosphoprotein 32 family A, C-terminal
P15407	interpro	IPR004827	Basic-leucine zipper domain
P15407	interpro	IPR029815	Fos-related antigen 1
P15407	interpro	IPR000837	AP-1 transcription factor
P15407	CDD	cd14721	bZIP_Fos
Q8IUF8	interpro	IPR003347	JmjC domain
Q6PL18	interpro	IPR001487	Bromodomain
Q6PL18	CDD	cd05528	Bromo_AAA
Q6PL18	interpro	IPR036427	Bromodomain-like superfamily
Q6PL18	interpro	IPR003593	AAA+ ATPase domain
Q6PL18	CDD	cd00009	AAA
Q6PL18	interpro	IPR027417	P-loop containing nucleoside triphosphate hydrolase
Q6PL18	interpro	IPR003959	ATPase, AAA-type, core
Q6PL18	interpro	IPR031252	ATPase family AAA domain-containing protein 2
Q6PL18	interpro	IPR003960	ATPase, AAA-type, conserved site
P07477	interpro	IPR001254	Serine proteases, trypsin domain
P07477	interpro	IPR018114	Serine proteases, trypsin family, histidine active site
P07477	interpro	IPR033116	Serine proteases, trypsin family, serine active site
P07477	interpro	IPR001314	Peptidase S1A, chymotrypsin family
P07477	interpro	IPR009003	Peptidase S1, PA clan
P28347	interpro	IPR000818	TEA/ATTS domain
P28347	interpro	IPR016361	Transcriptional enhancer factor, metazoa
P28347	interpro	IPR038096	TEA/ATTS domain superfamily
Q9ULW0	interpro	IPR027330	TPX2 central domain
Q9ULW0	interpro	IPR027329	TPX2, C-terminal
Q9ULW0	interpro	IPR009675	TPX2
Q9ULW0	interpro	IPR015128	Aurora-A binding
Q92522	interpro	IPR036390	Winged helix DNA-binding domain superfamily
Q92522	interpro	IPR036388	Winged helix-like DNA-binding domain superfamily
Q92522	interpro	IPR005818	Linker histone H1/H5, domain H15
Q92522	interpro	IPR005819	Histone H5
P00533	interpro	IPR001245	Serine-threonine/tyrosine-protein kinase, catalytic domain
P00533	interpro	IPR006212	Furin-like repeat
P00533	interpro	IPR008266	Tyrosine-protein kinase, active site
P00533	interpro	IPR006211	Furin-like cysteine-rich domain
P00533	interpro	IPR016245	Tyrosine protein kinase, EGF/ERB/XmrK receptor
P00533	interpro	IPR020635	Tyrosine-protein kinase, catalytic domain
P00533	interpro	IPR011009	Protein kinase-like domain superfamily
P00533	interpro	IPR009030	Growth factor receptor cysteine-rich domain superfamily
P00533	interpro	IPR000719	Protein kinase domain
P00533	CDD	cd05108	PTKc_EGFR
P00533	interpro	IPR000494	Receptor L-domain
P00533	CDD	cd12093	TM_ErbB1
P00533	interpro	IPR036941	Receptor L-domain superfamily
P00533	interpro	IPR017441	Protein kinase, ATP binding site
P00533	interpro	IPR032778	Growth factor receptor domain 4
P68431	interpro	IPR000164	Histone H3/CENP-A
P68431	interpro	IPR009072	Histone-fold
P68431	interpro	IPR007125	Histone H2A/H2B/H3
Q96T88	CDD	cd16613	RING-HC_UHRF
Q96T88	interpro	IPR015947	PUA-like superfamily
Q96T88	interpro	IPR019787	Zinc finger, PHD-finger
Q96T88	interpro	IPR001841	Zinc finger, RING-type
Q96T88	interpro	IPR021991	UHRF1, tandem tudor domain
Q96T88	interpro	IPR003105	SRA-YDG
Q96T88	interpro	IPR017907	Zinc finger, RING-type, conserved site
Q96T88	CDD	cd01797	NIRF_N
Q96T88	interpro	IPR000626	Ubiquitin domain
Q96T88	interpro	IPR036987	SRA-YDG superfamily
Q96T88	interpro	IPR029071	Ubiquitin-like domain superfamily
Q96T88	interpro	IPR011011	Zinc finger, FYVE/PHD-type
Q96T88	interpro	IPR001965	Zinc finger, PHD-type
Q96T88	CDD	cd15616	PHD_UHRF1
Q96T88	interpro	IPR013083	Zinc finger, RING/FYVE/PHD-type
P00918	interpro	IPR018338	Carbonic anhydrase, alpha-class, conserved site
P00918	interpro	IPR023561	Carbonic anhydrase, alpha-class
P00918	interpro	IPR036398	Alpha carbonic anhydrase domain superfamily
P00918	interpro	IPR001148	Alpha carbonic anhydrase domain
P00918	CDD	cd03119	alpha_CA_I_II_III_XIII
O95235	interpro	IPR036961	Kinesin motor domain superfamily
O95235	interpro	IPR027326	Kinesin-like protein KIF20A
O95235	interpro	IPR001752	Kinesin motor domain
O95235	interpro	IPR027640	Kinesin-like protein
O95235	interpro	IPR019821	Kinesin motor domain, conserved site
O95235	CDD	cd01368	KISc_KIF23_like
O95235	interpro	IPR027417	P-loop containing nucleoside triphosphate hydrolase
Q96FF9	interpro	IPR018605	Sororin protein
Q5TEZ5	interpro	IPR038927	Uncharacterized protein C6orf163
Q8IUE6	interpro	IPR002119	Histone H2A
Q8IUE6	interpro	IPR009072	Histone-fold
Q8IUE6	interpro	IPR007125	Histone H2A/H2B/H3
Q8IUE6	interpro	IPR032454	Histone H2A, C-terminal domain
Q8IUE6	interpro	IPR032458	Histone H2A conserved site
P50502	interpro	IPR006636	Heat shock chaperonin-binding
P50502	interpro	IPR013026	Tetratricopeptide repeat-containing domain
P50502	interpro	IPR019734	Tetratricopeptide repeat
P50502	interpro	IPR011990	Tetratricopeptide-like helical domain superfamily
P50502	interpro	IPR034649	Hsp70-interacting protein, N-terminal
Q9Y324	interpro	IPR006984	rRNA-processing protein Fcf1/Utp23
Q9Y324	interpro	IPR002716	PIN domain
Q9Y324	interpro	IPR037503	rRNA-processing protein Fcf1, PIN domain
Q9Y324	interpro	IPR029060	PIN-like domain superfamily
Q53GA4	interpro	IPR001849	Pleckstrin homology domain
Q53GA4	CDD	cd00821	PH
Q53GA4	interpro	IPR011993	PH-like domain superfamily
Q9UNW9	interpro	IPR036612	K Homology domain, type 1 superfamily
Q9UNW9	interpro	IPR033087	RNA-binding protein Nova-2
Q9UNW9	ProSiteProfiles	PS50084	Type-1 KH domain profile.
Q9UNW9	interpro	IPR004087	K Homology domain
Q9UNW9	CDD	cd02396	PCBP_like_KH
Q9UNW9	interpro	IPR004088	K Homology domain, type 1
Q9UNW9	CDD	cd00105	KH-I
P15531	interpro	IPR001564	Nucleoside diphosphate kinase
P15531	interpro	IPR023005	Nucleoside diphosphate kinase, active site
P15531	interpro	IPR034907	Nucleoside diphosphate kinase-like domain
P15531	CDD	cd04413	NDPk_I
P15531	interpro	IPR036850	Nucleoside diphosphate kinase-like domain superfamily
Q6FI13	interpro	IPR032454	Histone H2A, C-terminal domain
Q6FI13	interpro	IPR002119	Histone H2A
Q6FI13	interpro	IPR009072	Histone-fold
Q6FI13	interpro	IPR032458	Histone H2A conserved site
Q6FI13	interpro	IPR007125	Histone H2A/H2B/H3
Q15147	interpro	IPR001711	Phospholipase C, phosphatidylinositol-specific, Y domain
Q15147	interpro	IPR001192	Phosphoinositide phospholipase C family
Q15147	interpro	IPR017946	PLC-like phosphodiesterase, TIM beta/alpha-barrel domain superfamily
Q15147	interpro	IPR000909	Phosphatidylinositol-specific phospholipase C, X domain
Q15147	interpro	IPR035892	C2 domain superfamily
Q15147	CDD	cd16211	EFh_PI-PLCbeta4
Q15147	interpro	IPR000008	C2 domain
Q15147	interpro	IPR015359	Phosphoinositide-specific phospholipase C, EF-hand-like domain
Q15147	CDD	cd08591	PI-PLCc_beta
Q15147	interpro	IPR011992	EF-hand domain pair
Q15147	interpro	IPR009535	Phospholipase C-beta, conserved site
Q15147	interpro	IPR016280	Phosphatidylinositol-4, 5-bisphosphate phosphodiesterase beta
Q15147	CDD	cd00275	C2_PLC_like
Q15147	interpro	IPR037862	PLC-beta, PH domain
P04818	interpro	IPR000398	Thymidylate synthase
P04818	interpro	IPR023451	Thymidylate synthase/dCMP hydroxymethylase domain
P04818	interpro	IPR020940	Thymidylate synthase, active site
P04818	interpro	IPR036926	Thymidylate synthase/dCMP hydroxymethylase superfamily
P10412	interpro	IPR005818	Linker histone H1/H5, domain H15
P10412	interpro	IPR005819	Histone H5
P10412	interpro	IPR036388	Winged helix-like DNA-binding domain superfamily
P10412	interpro	IPR036390	Winged helix DNA-binding domain superfamily
P42025	interpro	IPR004000	Actin family
P42025	interpro	IPR004001	Actin, conserved site
P42025	CDD	cd00012	NBD_sugar-kinase_HSP70_actin
P42025	interpro	IPR020902	Actin/actin-like conserved site
P42025	interpro	IPR029909	Actin-related protein 1 family
P16403	interpro	IPR005818	Linker histone H1/H5, domain H15
P16403	interpro	IPR036388	Winged helix-like DNA-binding domain superfamily
P16403	interpro	IPR036390	Winged helix DNA-binding domain superfamily
P16403	interpro	IPR005819	Histone H5
Q9H939	CDD	cd07672	F-BAR_PSTPIP2
Q9H939	interpro	IPR027267	AH/BAR domain superfamily
Q9H939	interpro	IPR001060	FCH domain
Q9H939	interpro	IPR030106	Proline-serine-threonine phosphatase-interacting protein 2
Q9H939	interpro	IPR031160	F-BAR domain
Q9BXS6	interpro	IPR026756	Nucleolar and spindle-associated protein 1
Q58FF6	interpro	IPR003594	Histidine kinase/HSP90-like ATPase
Q58FF6	interpro	IPR037196	HSP90, C-terminal domain
Q58FF6	interpro	IPR036890	Histidine kinase/HSP90-like ATPase superfamily
Q58FF6	interpro	IPR001404	Heat shock protein Hsp90 family
Q58FF6	interpro	IPR020568	Ribosomal protein S5 domain 2-type fold
Q58FF6	interpro	IPR020575	Heat shock protein Hsp90, N-terminal
Q96F63	interpro	IPR018613	Protein of unknown function DUF2052, coiled-coil
O00767	interpro	IPR015876	Acyl-CoA desaturase
O00767	interpro	IPR001522	Fatty acid desaturase type 1, conserved site
Q16533	interpro	IPR019188	Small nuclear RNA activating complex (SNAPc), subunit SNAP43

## Sheet: domain2protein
ID	Scource	Definition	#Diff	#Seqs
IPR000006	interpro	Metallothionein, vertebrate	3	P02795 P04732 P80297
IPR017854	interpro	Metallothionein domain superfamily	3	P02795 P04732 P80297
IPR003019	interpro	Metallothionein	3	P02795 P04732 P80297
IPR018064	interpro	Metallothionein, vertebrate, metal binding site	3	P02795 P04732 P80297
IPR023587	interpro	Metallothionein domain superfamily, vertebrate	3	P02795 P04732 P80297
IPR017956	interpro	AT hook, DNA-binding motif	1	P52926
IPR000637	interpro	HMG-I/HMG-Y, DNA-binding, conserved site	1	P52926
IPR000116	interpro	High mobility group protein HMGA	1	P52926
IPR023795	interpro	Serpin, conserved site	2	P05121 P35237
IPR000215	interpro	Serpin family	2	P05121 P35237
cd02051	CDD	PAI-1_nexin-1	1	P05121
IPR023796	interpro	Serpin domain	2	P05121 P35237
IPR036186	interpro	Serpin superfamily	2	P05121 P35237
IPR000719	interpro	Protein kinase domain	13	O15075 P30530 Q13308 P22694 P04049 Q99986 P46734 P49761 Q01973 P29317 P53350 P49759 P00533
IPR036572	interpro	Doublecortin domain superfamily	1	O15075
IPR003533	interpro	Doublecortin domain	1	O15075
cd14183	CDD	STKc_DCKL1	1	O15075
IPR017441	interpro	Protein kinase, ATP binding site	11	O15075 P30530 P22694 P04049 Q99986 P46734 P49761 P29317 P53350 P49759 P00533
IPR011009	interpro	Protein kinase-like domain superfamily	15	O15075 P30530 Q13308 P22694 P42345 P04049 Q99986 P46734 P49761 Q01973 P29317 Q9BRS2 P53350 P49759 P00533
IPR008271	interpro	Serine/threonine-protein kinase, active site	8	O15075 P22694 P04049 Q99986 P46734 P49761 P53350 P49759
IPR007593	interpro	CD225/Dispanin family	1	Q01628
IPR014756	interpro	Immunoglobulin E-set	2	P52566 P61916
IPR000406	interpro	Rho protein GDP-dissociation inhibitor	1	P52566
IPR024792	interpro	Rho GDP-dissociation inhibitor domain superfamily	1	P52566
cd00992	CDD	PDZ_signaling	2	Q8IVF2 Q9Y4G8
IPR001478	interpro	PDZ domain	2	Q8IVF2 Q9Y4G8
IPR036034	interpro	PDZ superfamily	2	Q8IVF2 Q9Y4G8
IPR008370	interpro	Voltage-dependent calcium channel, gamma-6 subunit	1	Q9BXT2
IPR008368	interpro	Voltage-dependent calcium channel, gamma subunit	1	Q9BXT2
IPR004031	interpro	PMP-22/EMP/MP20/Claudin superfamily	3	Q9BXT2 O95832 P54852
IPR015943	interpro	WD40/YVTN repeat-like-containing domain superfamily	4	O75326 Q99523 Q15334 Q9GZL7
IPR013783	interpro	Immunoglobulin-like fold	21	O75326 P02751 P30530 P15509 P43121 P05362 Q13308 P15151 Q9Y2H6 P10321 P04439 Q9Y624 P13747 P61769 Q08722 O43278 O95297 P01889 P24821 Q01973 P29317
IPR007110	interpro	Immunoglobulin-like domain	14	O75326 P30530 P43121 Q13308 P15151 P10321 P04439 Q9Y624 P13747 P61769 Q08722 O95297 P01889 Q01973
IPR002165	interpro	Plexin repeat	1	O75326
IPR016201	interpro	PSI domain	1	O75326
IPR001627	interpro	Sema domain	1	O75326
IPR036179	interpro	Immunoglobulin-like domain superfamily	15	O75326 P30530 P43121 P05362 Q13308 P15151 P10321 P04439 Q9Y624 P13747 P61769 Q08722 O95297 P01889 Q01973
cd11243	CDD	Sema_7A	1	O75326
IPR027231	interpro	Semaphorin	1	O75326
IPR036352	interpro	Sema domain superfamily	1	O75326
IPR010007	interpro	SPAN-X family	2	Q9NS25 Q9BXN6
IPR000203	interpro	GPS motif	1	Q9Y653
IPR000832	interpro	GPCR, family 2, secretin-like	1	Q9Y653
IPR003910	interpro	GPCR, family 2, orphan receptor, GPR1/GPR3/GPR5	1	Q9Y653
IPR017981	interpro	GPCR, family 2-like	1	Q9Y653
IPR002715	interpro	Nascent polypeptide-associated complex NAC domain	2	Q96K17 P20290
IPR038187	interpro	NAC A/B domain superfamily	2	Q96K17 P20290
IPR012290	interpro	Fibrinogen, alpha/beta/gamma chain, coiled coil domain	1	P02679
IPR002181	interpro	Fibrinogen, alpha/beta/gamma chain, C-terminal globular domain	2	P02679 P24821
IPR014715	interpro	Fibrinogen, alpha/beta/gamma chain, C-terminal globular, subdomain 2	1	P02679
IPR014716	interpro	Fibrinogen, alpha/beta/gamma chain, C-terminal globular, subdomain 1	1	P02679
IPR020837	interpro	Fibrinogen, conserved site	1	P02679
IPR037581	interpro	Fibrinogen gamma chain	1	P02679
IPR036056	interpro	Fibrinogen-like, C-terminal	2	P02679 P24821
IPR011013	interpro	Galactose mutarotase-like domain superfamily	1	Q14697
IPR013780	interpro	Glycosyl hydrolase, all-beta	1	Q14697
cd06603	CDD	GH31_GANC_GANAB_alpha	1	Q14697
IPR025887	interpro	Glycoside hydrolase family 31, N-terminal domain	1	Q14697
cd14752	CDD	GH31_N	1	Q14697
IPR030459	interpro	Glycosyl hydrolases family 31, conserved site	1	Q14697
IPR000322	interpro	Glycoside hydrolase family 31	1	Q14697
IPR017853	interpro	Glycoside hydrolase superfamily	2	Q14697 P54803
IPR030458	interpro	Glycosyl hydrolases family 31, active site	1	Q14697
IPR027321	interpro	Microtubule-associated protein 1B	1	P46821
IPR000102	interpro	Neuraxin/MAP1B repeat	1	P46821
IPR026074	interpro	Microtubule associated protein 1	1	P46821
IPR007745	interpro	Cytochrome c oxidase copper chaperone	1	Q14061
IPR009069	interpro	Cysteine alpha-hairpin motif superfamily	1	Q14061
PS51808	ProSiteProfiles	Coiled coil-helix-coiled coil-helix (CHCH) domain profile.	3	Q14061 Q7Z7K0 Q5T1J5
IPR000301	interpro	Tetraspanin	3	P27701 P21926 O43657
IPR008952	interpro	Tetraspanin, EC2 domain superfamily	3	P27701 P21926 O43657
IPR018503	interpro	Tetraspanin, conserved site	3	P27701 P21926 O43657
IPR018499	interpro	Tetraspanin/Peripherin	3	P27701 P21926 O43657
cd03160	CDD	CD37_CD82_like_LEL	1	P27701
cd03152	CDD	CD9_LEL	1	P21926
IPR003961	interpro	Fibronectin type III	6	P02751 P30530 P15509 Q9Y2H6 P24821 P29317
IPR000083	interpro	Fibronectin, type I	1	P02751
IPR036116	interpro	Fibronectin type III superfamily	6	P02751 P30530 P15509 Q9Y2H6 P24821 P29317
IPR000562	interpro	Fibronectin type II domain	1	P02751
IPR036943	interpro	Fibronectin type II domain superfamily	1	P02751
IPR013806	interpro	Kringle-like fold	3	P02751 P00749 Q01973
PR00013	PRINTS	Fibronectin type II repeat signature	1	P02751
IPR008253	interpro	Marvel domain	2	Q96S97 Q9UBR5
IPR039008	interpro	Intermediate filament, rod domain	1	Q14533
IPR018039	interpro	Intermediate filament protein, conserved site	1	Q14533
IPR032444	interpro	Keratin type II head	1	Q14533
IPR003054	interpro	Keratin, type II	1	Q14533
IPR001664	interpro	Intermediate filament protein	1	Q14533
IPR036938	interpro	Phosphatidic acid phosphatase type 2/haloperoxidase superfamily	2	O14495 Q86YN1
IPR000326	interpro	Phosphatidic acid phosphatase type 2/haloperoxidase	2	O14495 Q86YN1
IPR028675	interpro	Lipid phosphate phosphohydrolase 3	1	O14495
cd03384	CDD	PAP2_wunen	1	O14495
IPR019831	interpro	Manganese/iron superoxide dismutase, N-terminal	1	P04179
IPR019832	interpro	Manganese/iron superoxide dismutase, C-terminal	1	P04179
IPR001189	interpro	Manganese/iron superoxide dismutase	1	P04179
IPR036314	interpro	Manganese/iron superoxide dismutase, C-terminal domain superfamily	1	P04179
IPR036324	interpro	Manganese/iron superoxide dismutase, N-terminal domain superfamily	1	P04179
IPR019833	interpro	Manganese/iron superoxide dismutase, binding site	1	P04179
PR01077	PRINTS	Claudin family signature	1	O95832
IPR003548	interpro	Claudin-1	1	O95832
IPR006187	interpro	Claudin	1	O95832
IPR017974	interpro	Claudin, conserved site	1	O95832
IPR020635	interpro	Tyrosine-protein kinase, catalytic domain	3	P30530 P29317 P00533
IPR003599	interpro	Immunoglobulin subtype	8	P30530 P43121 P05362 Q13308 P15151 Q9Y624 O95297 Q01973
IPR001245	interpro	Serine-threonine/tyrosine-protein kinase, catalytic domain	6	P30530 Q13308 P04049 Q01973 P29317 P00533
cd05075	CDD	PTKc_Axl	1	P30530
PF13927	Pfam	Immunoglobulin domain	4	P30530 P43121 Q13308 Q9Y624
cd05749	CDD	Ig2_Axl_Tyro3_like	1	P30530
IPR008266	interpro	Tyrosine-protein kinase, active site	5	P30530 Q13308 Q01973 P29317 P00533
cd00096	CDD	Ig	6	P30530 P43121 P05362 Q13308 Q9Y624 Q01973
IPR008280	interpro	Tubulin/FtsZ, C-terminal	3	Q13885 Q71U36 A6NHL2
IPR036525	interpro	Tubulin/FtsZ, GTPase domain superfamily	3	Q13885 Q71U36 A6NHL2
IPR023123	interpro	Tubulin, C-terminal	3	Q13885 Q71U36 A6NHL2
IPR002453	interpro	Beta tubulin	1	Q13885
IPR013838	interpro	Beta tubulin, autoregulation binding site	1	Q13885
IPR018316	interpro	Tubulin/FtsZ, 2-layer sandwich domain	3	Q13885 Q71U36 A6NHL2
IPR000217	interpro	Tubulin	3	Q13885 Q71U36 A6NHL2
IPR017975	interpro	Tubulin, conserved site	3	Q13885 Q71U36 A6NHL2
cd02187	CDD	beta_tubulin	1	Q13885
IPR003008	interpro	Tubulin/FtsZ, GTPase domain	3	Q13885 Q71U36 A6NHL2
IPR037103	interpro	Tubulin/FtsZ, C-terminal domain superfamily	3	Q13885 Q71U36 A6NHL2
cd16743	CDD	RING-HC_RNF5	1	Q99942
IPR001841	interpro	Zinc finger, RING-type	4	Q99942 Q6UWE0 Q96PM5 Q96T88
IPR017907	interpro	Zinc finger, RING-type, conserved site	2	Q99942 Q96T88
IPR013083	interpro	Zinc finger, RING/FYVE/PHD-type	5	Q99942 Q6UWE0 Q9BQS8 Q96PM5 Q96T88
PF13920	Pfam	Zinc finger, C3HC4 type (RING finger)	2	Q99942 Q6UWE0
IPR037192	interpro	ERO1-like superfamily	1	Q96HE7
IPR007266	interpro	Endoplasmic reticulum oxidoreductin 1	1	Q96HE7
IPR004254	interpro	AdipoR/Haemolysin-III-related	1	Q9NXK6
IPR005225	interpro	Small GTP-binding protein domain	7	P11234 P20339 P08134 O95716 Q13637 O14966 P18085
IPR027417	interpro	P-loop containing nucleoside triphosphate hydrolase	28	P11234 P28288 P08183 P20339 Q03518 Q86W25 Q92599 P32456 P08134 O95716 Q13637 Q03519 O95786 O14966 Q1KMD3 Q5K651 P43246 Q14807 Q9NVP1 O14678 Q13057 Q9BVP2 Q9NRZ9 P18085 Q8IVL1 Q9NR30 Q6PL18 O95235
PR00449	PRINTS	Transforming protein P21 ras signature	6	P11234 P20339 P08134 O95716 Q13637 O14966
cd04139	CDD	RalA_RalB	1	P11234
IPR001806	interpro	Small GTPase superfamily	6	P11234 P20339 P08134 O95716 Q13637 O14966
IPR028412	interpro	Ras-related protein Ral	1	P11234
IPR020849	interpro	Small GTPase superfamily, Ras-type	1	P11234
IPR020877	interpro	Interleukin-1 conserved site	1	P01584
IPR003502	interpro	Interleukin-1 propeptide	1	P01584
cd00100	CDD	IL1	1	P01584
IPR000975	interpro	Interleukin-1 family	2	P01584 Q14116
IPR003296	interpro	Interleukin-1 beta	1	P01584
PR01359	PRINTS	Interleukin-1 beta precursor signature	1	P01584
IPR008996	interpro	Cytokine IL1/FGF	2	P01584 Q14116
PR00262	PRINTS	IL1/HBGF family signature	1	P01584
PR01357	PRINTS	Interleukin-1 alpha/beta precursor family signature	1	P01584
IPR010530	interpro	NADH-ubiquinone reductase complex 1 MLRQ subunit	2	Q9C002 O00483
IPR031653	interpro	MAPK-interacting and spindle-stabilising protein	1	Q8NDC0
cd01679	CDD	RNR_I	1	P23921
IPR005144	interpro	ATP-cone domain	1	P23921
IPR000788	interpro	Ribonucleotide reductase large subunit, C-terminal	1	P23921
IPR008926	interpro	Ribonucleotide reductase R1 subunit, N-terminal	1	P23921
IPR013509	interpro	Ribonucleotide reductase large subunit, N-terminal	1	P23921
IPR013346	interpro	Ribonucleotide reductase, class I , alpha subunit	1	P23921
IPR006571	interpro	TLDc domain	1	Q6P9B6
IPR029341	interpro	FAM21/CAPZIP domain	1	Q6JBY9
IPR007850	interpro	RCSD	1	Q6JBY9
IPR006329	interpro	AMP deaminase	1	Q01432
IPR006650	interpro	Adenosine/AMP deaminase active site	1	Q01432
IPR029771	interpro	AMP deaminase 3	1	Q01432
IPR032466	interpro	Metal-dependent hydrolase	1	Q01432
IPR001365	interpro	Adenosine/AMP deaminase domain	1	Q01432
cd03223	CDD	ABCD_peroxisomal_ALDP	2	P28288 O14678
IPR017871	interpro	ABC transporter, conserved site	5	P28288 P08183 Q03518 Q03519 O14678
IPR003593	interpro	AAA+ ATPase domain	7	P28288 P08183 Q03518 Q03519 O14678 Q8IVL1 Q6PL18
IPR011527	interpro	ABC transporter type 1, transmembrane domain	5	P28288 P08183 Q03518 Q03519 O14678
IPR003439	interpro	ABC transporter-like	5	P28288 P08183 Q03518 Q03519 O14678
IPR005283	interpro	Peroxysomal long chain fatty acyl transporter	1	P28288
IPR031241	interpro	ATP-binding cassette sub-family D member 3	1	P28288
IPR036640	interpro	ABC transporter type 1, transmembrane domain superfamily	5	P28288 P08183 Q03518 Q03519 O14678
IPR000834	interpro	Peptidase M14, carboxypeptidase A	2	O75976 Q9UI42
IPR015567	interpro	Peptidase M14B, caboxypeptidase D	1	O75976
IPR034224	interpro	Carboxypeptidase D, carboxypeptidase-like domain 2	1	O75976
IPR008969	interpro	Carboxypeptidase-like, regulatory domain superfamily	2	O75976 Q15155
cd11308	CDD	Peptidase_M14NE-CP-C_like	1	O75976
PF13620	Pfam	Carboxypeptidase regulatory-like domain	2	O75976 Q15155
IPR033848	interpro	Carboxypeptidase D, carboxypeptidase-like domain 3	1	O75976
IPR034241	interpro	Carboxypeptidase D, carboxypeptidase-like domain 1	1	O75976
IPR000668	interpro	Peptidase C1A, papain C-terminal	2	P07858 Q9UBR2
IPR025661	interpro	Cysteine peptidase, asparagine active site	2	P07858 Q9UBR2
IPR012599	interpro	Peptidase C1A, propeptide	1	P07858
IPR013128	interpro	Peptidase C1A	2	P07858 Q9UBR2
IPR025660	interpro	Cysteine peptidase, histidine active site	1	P07858
IPR000169	interpro	Cysteine peptidase, cysteine active site	1	P07858
cd02620	CDD	Peptidase_C1A_CathepsinB	1	P07858
IPR038765	interpro	Papain-like cysteine peptidase superfamily	4	P07858 Q9UBR2 Q5VVQ6 Q96DC9
IPR013880	interpro	Yos1-like	1	Q9Y5U9
IPR035518	interpro	Dolichyl-phosphate beta-glucosyltransferase	1	Q9Y673
IPR029044	interpro	Nucleotide-diphospho-sugar transferases	3	Q9Y673 O00469 Q6P9A2
IPR001173	interpro	Glycosyltransferase 2-like	2	Q9Y673 Q6P9A2
IPR036055	interpro	LDL receptor-like superfamily	2	Q07954 O43278
IPR002172	interpro	Low-density lipoprotein (LDL) receptor class A repeat	2	Q07954 O43278
IPR000033	interpro	LDLR class B repeat	1	Q07954
IPR000742	interpro	EGF-like domain	10	Q07954 Q6UXH1 P00749 P07942 O75093 Q96HD1 Q13753 O00339 P15514 P24821
PF14670	Pfam	Coagulation Factor Xa inhibitory site	2	Q07954 O00339
IPR013032	interpro	EGF-like, conserved site	9	Q07954 Q6UXH1 P00749 Q13751 O75093 Q96HD1 O00339 P15514 P24821
cd00054	CDD	EGF_CA	5	Q07954 O75093 Q96HD1 O00339 P24821
IPR023415	interpro	Low-density lipoprotein (LDL) receptor class A, conserved site	2	Q07954 O43278
IPR011042	interpro	Six-bladed beta-propeller, TolB-like	3	Q07954 Q5JS37 Q15165
IPR000152	interpro	EGF-type aspartate/asparagine hydroxylation site	5	Q07954 Q6UXH1 O75093 Q96HD1 O00339
IPR009030	interpro	Growth factor receptor cysteine-rich domain superfamily	7	Q07954 Q6UXH1 O75093 Q96HD1 O00339 P29317 P00533
IPR001881	interpro	EGF-like calcium-binding domain	5	Q07954 Q6UXH1 O75093 Q96HD1 O00339
IPR018097	interpro	EGF-like calcium-binding, conserved site	4	Q07954 Q6UXH1 O75093 Q96HD1
IPR026823	interpro	Complement Clr-like EGF domain	2	Q07954 O00339
IPR032485	interpro	Domain of unknown function DUF5050	1	Q07954
IPR019537	interpro	Transmembrane protein 65	1	Q6PI78
IPR017305	interpro	Leupaxin/Paxillin/TGFB1I1	1	O60711
IPR001781	interpro	Zinc finger, LIM-type	2	O60711 P52943
IPR034961	interpro	Leupaxin	1	O60711
cd09410	CDD	LIM3_Leupaxin	1	O60711
cd09408	CDD	LIM2_Leupaxin	1	O60711
cd09339	CDD	LIM4_Paxillin_like	1	O60711
cd09406	CDD	LIM1_Leupaxin	1	O60711
IPR036990	interpro	Metallocarboxypeptidase-like, propeptide	1	Q9UI42
IPR003146	interpro	Carboxypeptidase, activation peptide	1	Q9UI42
IPR034248	interpro	Carboxypeptidase A, carboxypeptidase domain	1	Q9UI42
IPR015529	interpro	Interleukin-18	1	Q14116
IPR005845	interpro	Alpha-D-phosphohexomutase, alpha/beta/alpha domain II	1	Q6PCE3
IPR016055	interpro	Alpha-D-phosphohexomutase, alpha/beta/alpha I/II/III	1	Q6PCE3
IPR036900	interpro	Alpha-D-phosphohexomutase, C-terminal domain superfamily	1	Q6PCE3
cd05799	CDD	PGM2	1	Q6PCE3
IPR005846	interpro	Alpha-D-phosphohexomutase, alpha/beta/alpha domain III	1	Q6PCE3
IPR005844	interpro	Alpha-D-phosphohexomutase, alpha/beta/alpha domain I	1	Q6PCE3
IPR005843	interpro	Alpha-D-phosphohexomutase, C-terminal	1	Q6PCE3
IPR006212	interpro	Furin-like repeat	3	Q6UXH1 Q96HD1 P00533
IPR002049	interpro	Laminin EGF domain	5	Q6UXH1 Q13751 P07942 Q96HD1 Q13753
IPR001079	interpro	Galectin, carbohydrate recognition domain	1	P09382
IPR013320	interpro	Concanavalin A-like lectin/glucanase domain superfamily	6	P09382 P20908 O75093 Q8WW59 Q1KMD3 Q8NFP9
IPR004240	interpro	Nonaspanin (TM9SF)	1	O15321
IPR036465	interpro	von Willebrand factor A-like domain superfamily	2	P17301 O00339
IPR013519	interpro	Integrin alpha beta-propellor	2	P17301 P08648
PR00453	PRINTS	Von Willebrand factor type A domain signature	2	P17301 O00339
IPR002035	interpro	von Willebrand factor, type A	2	P17301 O00339
IPR013517	interpro	FG-GAP repeat	2	P17301 P08648
cd01469	CDD	vWA_integrins_alpha_subunit	1	P17301
IPR013649	interpro	Integrin alpha-2	2	P17301 P08648
IPR032695	interpro	Integrin domain superfamily	2	P17301 P08648
IPR028994	interpro	Integrin alpha, N-terminal	2	P17301 P08648
IPR000413	interpro	Integrin alpha chain	2	P17301 P08648
IPR018184	interpro	Integrin alpha chain, C-terminal cytoplasmic region, conserved site	2	P17301 P08648
IPR033298	interpro	Caveolae-associated protein 2	1	O95810
IPR026752	interpro	Cavin family	1	O95810
IPR029778	interpro	Centrosomal protein of 85kDa-like	1	Q5SZL2
IPR014044	interpro	CAP domain	2	P48060 Q9H4G4
IPR018244	interpro	Allergen V5/Tpx-1-related, conserved site	2	P48060 Q9H4G4
IPR035940	interpro	CAP superfamily	2	P48060 Q9H4G4
IPR002413	interpro	Ves allergen	1	P48060
IPR034121	interpro	Glioma pathogenesis-related protein 1-like, SCP domain	1	P48060
IPR001283	interpro	Cysteine-rich secretory protein, allergen V5/Tpx-1-related	2	P48060 Q9H4G4
IPR001152	interpro	Beta-thymosin	1	P63313
IPR038386	interpro	Beta-thymosin superfamily	1	P63313
IPR032472	interpro	Argonaute linker 2 domain	1	Q9UKV8
IPR003165	interpro	Piwi domain	1	Q9UKV8
IPR003100	interpro	PAZ domain	1	Q9UKV8
cd04657	CDD	Piwi_ago-like	1	Q9UKV8
IPR012337	interpro	Ribonuclease H-like superfamily	2	Q9UKV8 Q9UIV1
IPR032473	interpro	Protein argonaute, Mid domain	1	Q9UKV8
IPR036085	interpro	PAZ domain superfamily	1	Q9UKV8
IPR014811	interpro	Argonaute, linker 1 domain	1	Q9UKV8
IPR032474	interpro	Protein argonaute, N-terminal	1	Q9UKV8
IPR036397	interpro	Ribonuclease H superfamily	2	Q9UKV8 Q9UIV1
cd02846	CDD	PAZ_argonaute_like	1	Q9UKV8
IPR028602	interpro	Protein argonaute-2	1	Q9UKV8
IPR000210	interpro	BTB/POZ domain	4	Q4G0X4 Q9H2C0 Q8NAB2 Q96CX2
IPR003131	interpro	Potassium channel tetramerisation-type BTB domain	2	Q4G0X4 Q96CX2
IPR011333	interpro	SKP1/BTB/POZ domain superfamily	4	Q4G0X4 Q9H2C0 Q8NAB2 Q96CX2
IPR001299	interpro	Ependymin	1	Q9UM22
IPR018224	interpro	Ependymin, conserved site	1	Q9UM22
IPR026084	interpro	Trans-Golgi network integral membrane protein TGN38	1	O43493
IPR013017	interpro	NHL repeat, subgroup	1	Q5JS37
IPR001258	interpro	NHL repeat	1	Q5JS37
IPR015321	interpro	Type I cytokine receptor, cytokine-binding domain	1	P15509
IPR003532	interpro	Short hematopoietin receptor, family 2, conserved site	1	P15509
cd00012	CDD	NBD_sugar-kinase_HSP70_actin	2	Q2TB90 P42025
PR00475	PRINTS	Hexokinase family signature	1	Q2TB90
IPR019807	interpro	Hexokinase, binding site	1	Q2TB90
IPR001312	interpro	Hexokinase	1	Q2TB90
IPR022672	interpro	Hexokinase, N-terminal	1	Q2TB90
IPR022673	interpro	Hexokinase, C-terminal	1	Q2TB90
IPR002138	interpro	Peptidase C14, caspase non-catalytic subunit p10	1	P49662
IPR015917	interpro	Peptidase C14A, caspase catalytic domain	1	P49662
IPR011029	interpro	Death-like domain superfamily	3	P49662 Q86W25 Q01484
IPR029030	interpro	Caspase-like domain superfamily	1	P49662
IPR001309	interpro	Peptidase C14, p20 domain	1	P49662
IPR001315	interpro	CARD domain	1	P49662
cd08325	CDD	CARD_CASP1-like	1	P49662
PF00656	Pfam	Caspase domain	1	P49662
IPR016129	interpro	Peptidase family C14A, His active site	1	P49662
IPR033139	interpro	Peptidase family C14A, cysteine active site	1	P49662
IPR008775	interpro	Phytanoyl-CoA dioxygenase	1	O14832
IPR001314	interpro	Peptidase S1A, chymotrypsin family	2	P00749 P07477
IPR000001	interpro	Kringle	2	P00749 Q01973
PR00018	PRINTS	Kringle domain signature	2	P00749 Q01973
IPR001254	interpro	Serine proteases, trypsin domain	2	P00749 P07477
IPR018114	interpro	Serine proteases, trypsin family, histidine active site	2	P00749 P07477
IPR038178	interpro	Kringle superfamily	2	P00749 Q01973
IPR018056	interpro	Kringle, conserved site	2	P00749 Q01973
IPR033116	interpro	Serine proteases, trypsin family, serine active site	2	P00749 P07477
IPR009003	interpro	Peptidase S1, PA clan	2	P00749 P07477
IPR034814	interpro	Urokinase-type plasminogen activator	1	P00749
IPR000885	interpro	Fibrillar collagen, C-terminal	1	P20908
IPR001791	interpro	Laminin G domain	2	P20908 O75093
IPR008160	interpro	Collagen triple helix repeat	1	P20908
IPR002499	interpro	Major vault protein, N-terminal	1	Q14764
IPR021870	interpro	Major vault protein, shoulder domain	1	Q14764
IPR039059	interpro	Major vault protein	1	Q14764
IPR013162	interpro	CD80-like, immunoglobulin C2-set	2	P43121 P15151
IPR013106	interpro	Immunoglobulin V-set domain	4	P43121 P15151 Q9Y624 O95297
IPR013151	interpro	Immunoglobulin	1	P43121
IPR003598	interpro	Immunoglobulin subtype 2	4	P43121 Q13308 Q9Y624 Q01973
IPR004978	interpro	Stanniocalcin	1	P52823
SFLDS00019	SFLD	Glutathione Transferase (cytosolic)	1	O95833
IPR004045	interpro	Glutathione S-transferase, N-terminal	1	O95833
cd03061	CDD	GST_N_CLIC	1	O95833
IPR002946	interpro	Intracellular chloride channel	1	O95833
cd10299	CDD	GST_C_CLIC3	1	O95833
IPR030261	interpro	Chloride intracellular channel protein 3	1	O95833
IPR036249	interpro	Thioredoxin-like superfamily	4	O95833 Q8TED1 P07203 P62341
IPR036282	interpro	Glutathione S-transferase, C-terminal domain superfamily	1	O95833
IPR010987	interpro	Glutathione S-transferase, C-terminal-like	1	O95833
PF13410	Pfam	Glutathione S-transferase, C-terminal domain	1	O95833
IPR001878	interpro	Zinc finger, CCHC-type	1	Q9NUD5
IPR036875	interpro	Zinc finger, CCHC-type superfamily	1	Q9NUD5
PD191299	ProDom	C6ORF47 G4 HOMOLOG POLYMORPHISM	1	O95873
IPR029073	interpro	Protein of unknown function DUF4661	1	O95873
cd00055	CDD	EGF_Lam	4	Q13751 P07942 Q13753 P24821
IPR038684	interpro	Laminin, N-terminal domain superfamily	2	Q13751 P07942
IPR008211	interpro	Laminin, N-terminal	2	Q13751 P07942
PR00011	PRINTS	Type III EGF-like signature	3	Q13751 P07942 Q13753
IPR013892	interpro	Cytochrome c oxidase biogenesis protein Cmc1-like	1	Q7Z7K0
IPR007014	interpro	FUN14	1	Q9BWH2
IPR003987	interpro	Intercellular adhesion molecule/vascular cell adhesion molecule, N-terminal	1	P05362
cd05755	CDD	Ig2_ICAM-1_like	1	P05362
IPR013768	interpro	Intercellular adhesion molecule, N-terminal	1	P05362
IPR003988	interpro	Intercellular adhesion molecule	1	P05362
IPR000237	interpro	GRIP domain	1	Q92805
IPR030258	interpro	Multidrug resistance protein 1	1	P08183
cd03249	CDD	ABC_MTABC3_MDL1_MDL2	1	P08183
IPR008605	interpro	Extracellular matrix protein 1	1	Q16610
IPR020858	interpro	Serum albumin-like	1	Q16610
IPR009764	interpro	Ovarian carcinoma immunoreactive antigen	1	Q9NX40
IPR013015	interpro	Laminin IV type B	1	P07942
IPR023379	interpro	BART domain	1	Q9Y2Y0
IPR038849	interpro	ADP-ribosylation factor-like protein 2-binding protein	1	Q9Y2Y0
IPR012677	interpro	Nucleotide-binding alpha-beta plait domain superfamily	1	Q15434
IPR000504	interpro	RNA recognition motif domain	1	Q15434
cd12474	CDD	RRM2_MSSP2	1	Q15434
IPR035979	interpro	RNA-binding domain superfamily	2	Q15434 Q9NR30
IPR011992	interpro	EF-hand domain pair	5	P80303 Q12841 Q99584 P37235 Q15147
IPR018247	interpro	EF-Hand 1, calcium-binding site	2	P80303 P37235
IPR002048	interpro	EF-hand domain	3	P80303 Q12841 P37235
IPR028813	interpro	Nucleobindin-2	1	P80303
IPR026138	interpro	Ceroid-lipofuscinosis neuronal protein 5	1	O75503
IPR016135	interpro	Ubiquitin-conjugating enzyme/RWD-like	3	O14933 P49459 P63146
IPR023313	interpro	Ubiquitin-conjugating enzyme, active site	3	O14933 P49459 P63146
IPR000608	interpro	Ubiquitin-conjugating enzyme E2	3	O14933 P49459 P63146
IPR020811	interpro	Enolase, N-terminal	1	P09104
IPR020810	interpro	Enolase, C-terminal TIM barrel domain	1	P09104
IPR036849	interpro	Enolase-like, C-terminal domain superfamily	1	P09104
IPR020809	interpro	Enolase, conserved site	1	P09104
IPR029017	interpro	Enolase-like, N-terminal	1	P09104
IPR000941	interpro	Enolase	1	P09104
SFLDF00002	SFLD	enolase	1	P09104
IPR034390	interpro	Enolase-like superfamily	1	P09104
IPR001286	interpro	Glycoside hydrolase, family 59	1	P54803
IPR035394	interpro	Glycosyl hydrolase family 59, central domain	1	P54803
IPR013785	interpro	Aldolase-type TIM barrel	1	P54803
IPR000595	interpro	Cyclic nucleotide-binding domain	1	Q9Y4G8
IPR000651	interpro	Ras-like guanine nucleotide exchange factor, N-terminal	1	Q9Y4G8
IPR000159	interpro	Ras-associating (RA) domain	1	Q9Y4G8
IPR001895	interpro	Ras guanine-nucleotide exchange factors catalytic domain	1	Q9Y4G8
IPR018490	interpro	Cyclic nucleotide-binding-like	1	Q9Y4G8
IPR029071	interpro	Ubiquitin-like domain superfamily	6	Q9Y4G8 O95166 Q5VVQ6 P04049 Q99933 Q96T88
IPR014710	interpro	RmlC-like jelly roll fold	2	Q9Y4G8 Q9BV57
cd01785	CDD	PDZ_GEF_RA	1	Q9Y4G8
IPR023578	interpro	Ras guanine nucleotide exchange factor domain superfamily	1	Q9Y4G8
IPR030739	interpro	Rap guanine nucleotide exchange factor 2	1	Q9Y4G8
PS51419	ProSiteProfiles	small GTPase Rab1 family profile.	4	P20339 O95716 Q13637 O14966
cd01860	CDD	Rab5_related	1	P20339
IPR034304	interpro	Plasma membrane calcium-transporting ATPase 4	1	P23634
cd02081	CDD	P-type_ATPase_Ca_PMCA-like	1	P23634
IPR001757	interpro	P-type ATPase	1	P23634
IPR006068	interpro	Cation-transporting P-type ATPase, C-terminal	1	P23634
IPR023214	interpro	HAD superfamily	1	P23634
PR00119	PRINTS	P-type cation-transporting ATPase superfamily signature	1	P23634
PF00122	Pfam	E1-E2 ATPase	1	P23634
IPR036412	interpro	HAD-like superfamily	1	P23634
SFLDF00027	SFLD	p-type atpase	1	P23634
IPR018303	interpro	P-type ATPase, phosphorylation site	1	P23634
IPR006408	interpro	P-type ATPase, subfamily IIB	1	P23634
IPR004014	interpro	Cation-transporting P-type ATPase, N-terminal	1	P23634
IPR023298	interpro	P-type ATPase, transmembrane domain superfamily	1	P23634
PF00702	Pfam	haloacid dehalogenase-like hydrolase	1	P23634
SFLDG00002	SFLD	C1.7: P-type atpase like	1	P23634
IPR022141	interpro	Plasma membrane calcium transporting P-type ATPase, C-terminal	1	P23634
PF13246	Pfam	Cation transport ATPase (P-type)	1	P23634
IPR008250	interpro	P-type ATPase, A domain superfamily	1	P23634
IPR023299	interpro	P-type ATPase, cytoplasmic domain N	1	P23634
IPR011990	interpro	Tetratricopeptide-like helical domain superfamily	4	Q6ZXV5 P09914 P42345 P50502
IPR019734	interpro	Tetratricopeptide repeat	3	Q6ZXV5 P09914 P50502
IPR013026	interpro	Tetratricopeptide repeat-containing domain	3	Q6ZXV5 P09914 P50502
PF14559	Pfam	Tetratricopeptide repeat	1	Q6ZXV5
PF13432	Pfam	Tetratricopeptide repeat	1	Q6ZXV5
IPR013618	interpro	Domain of unknown function DUF1736	1	Q6ZXV5
PS51257	ProSiteProfiles	Prokaryotic membrane lipoprotein lipid attachment site profile.	4	Q6ZXV5 P61009 P55085 P17813
IPR026139	interpro	GOLM1/CASC4 family	1	Q8NBJ4
IPR026143	interpro	Golgi membrane protein 1	1	Q8NBJ4
IPR001611	interpro	Leucine-rich repeat	5	O75093 Q6UWE0 Q86W25 Q6F5E8 Q92688
IPR032675	interpro	Leucine-rich repeat domain superfamily	5	O75093 Q6UWE0 Q86W25 Q96CD0 Q92688
IPR006207	interpro	Cystine knot, C-terminal	1	O75093
IPR003591	interpro	Leucine-rich repeat, typical subtype	2	O75093 Q6UWE0
IPR003645	interpro	Follistatin-like, N-terminal	2	O75093 Q12841
cd00110	CDD	LamG	1	O75093
IPR000483	interpro	Cysteine-rich flanking region, C-terminal	1	O75093
IPR000372	interpro	Leucine-rich repeat N-terminal domain	1	O75093
IPR009637	interpro	Lung seven transmembrane receptor-like	1	Q96K49
cd16233	CDD	EFh_SPARC_FSTL1	1	Q12841
IPR002350	interpro	Kazal domain	1	Q12841
IPR015369	interpro	Follistatin/Osteonectin EGF domain	1	Q12841
cd00104	CDD	KAZAL_FS	1	Q12841
IPR036773	interpro	TGF-beta binding (TB) domain superfamily	1	Q12841
IPR036058	interpro	Kazal domain superfamily	1	Q12841
IPR007653	interpro	Signal peptidase complex subunit 3	1	P61009
IPR001006	interpro	Procollagen-lysine 5-dioxygenase	1	O00469
IPR006620	interpro	Prolyl 4-hydroxylase, alpha subunit	1	O00469
IPR005123	interpro	Oxoglutarate/iron-dependent dioxygenase	1	O00469
cd05760	CDD	Ig2_PTK7	1	Q13308
cd05046	CDD	PTK_CCK4	1	Q13308
IPR033592	interpro	Inactive tyrosine-protein kinase 7	1	Q13308
IPR013098	interpro	Immunoglobulin I-set	2	Q13308 Q01973
IPR007648	interpro	Mitochondrial ATPase inhibitor	1	Q9UII2
IPR001179	interpro	FKBP-type peptidyl-prolyl cis-trans isomerase domain	1	Q00688
IPR023566	interpro	Peptidyl-prolyl cis-trans isomerase, FKBP-type	1	Q00688
IPR006757	interpro	Opioid growth factor receptor (OGFr) conserved domain	1	Q5TC84
IPR003730	interpro	Multi-copper polyphenol oxidoreductase	1	Q8IV20
IPR011324	interpro	Cytotoxic necrotizing factor-like, catalytic	1	Q8IV20
IPR038371	interpro	Multi-copper polyphenol oxidoreductase superfamily	1	Q8IV20
cd05718	CDD	Ig1_PVR_like	1	P15151
cd07703	CDD	Ig2_Nectin-2_like	1	P15151
IPR006977	interpro	Yip1 domain	1	Q9BSR8
IPR037354	interpro	COMM domain-containing protein 2	1	Q86X83
IPR017920	interpro	COMM domain	2	Q86X83 Q8N668
IPR016024	interpro	Armadillo-type fold	9	Q8NDA8 Q7Z3E5 Q9Y6D6 P42345 O75691 Q15397 Q8NFP9 Q9Y6E2 Q9BQG0
IPR021133	interpro	HEAT, type 2	1	Q8NDA8
IPR011989	interpro	Armadillo-like helical	4	Q8NDA8 Q7Z3E5 P42345 Q15397
IPR000357	interpro	HEAT repeat	1	Q8NDA8
IPR003879	interpro	Butyrophylin-like, SPRY domain	1	Q8WW59
IPR003877	interpro	SPRY domain	2	Q8WW59 Q1KMD3
IPR001870	interpro	B30.2/SPRY domain	2	Q8WW59 Q1KMD3
cd12903	CDD	SPRY_PRY_SPRYD4	1	Q8WW59
IPR013305	interpro	ABC transporter Tap-like	2	Q03518 Q03519
PR01896	PRINTS	ABC transporter family B2 signature	1	Q03518
IPR013306	interpro	Antigen peptide transporter 1	1	Q03518
cd03248	CDD	ABCC_TAP	2	Q03518 Q03519
IPR001660	interpro	Sterile alpha motif domain	3	Q6UWE0 Q5K651 P29317
cd09523	CDD	SAM_TAL	1	Q6UWE0
cd16515	CDD	RING-HC_LRSAM1	1	Q6UWE0
IPR013761	interpro	Sterile alpha motif/pointed domain superfamily	3	Q6UWE0 Q5K651 P29317
IPR034096	interpro	Mth938 domain-containing protein	1	Q9H7C9
IPR036748	interpro	MTH938-like superfamily	1	Q9H7C9
IPR007523	interpro	NDUFAF3/Mth938 domain-containing protein	1	Q9H7C9
IPR009653	interpro	Protein kish	2	Q8TBQ9 Q9NRX6
PF15711	Pfam	Interleukin-like EMT inducer	2	Q92520 Q9UHN6
cd13940	CDD	ILEI_FAM3C	1	Q92520
IPR039219	interpro	Protein FAM3C	1	Q92520
IPR039220	interpro	FAM3 family	1	Q92520
IPR034750	interpro	CULT domain	1	Q96SW2
IPR003111	interpro	Lon, substrate-binding domain	1	Q96SW2
IPR004910	interpro	Yippee/Mis18/Cereblon	1	Q96SW2
IPR015947	interpro	PUA-like superfamily	2	Q96SW2 Q96T88
IPR008334	interpro	5'-Nucleotidase, C-terminal	1	P21589
IPR006146	interpro	5'-Nucleotidase, conserved site	1	P21589
cd07409	CDD	MPP_CD73_N	1	P21589
IPR006179	interpro	5'-Nucleotidase/apyrase	1	P21589
IPR029052	interpro	Metallo-dependent phosphatase-like	1	P21589
IPR036907	interpro	5'-Nucleotidase, C-terminal domain superfamily	1	P21589
IPR004843	interpro	Calcineurin-like phosphoesterase domain, ApaH type	1	P21589
IPR007794	interpro	Ribosome receptor lysine/proline rich	1	Q9P2E9
IPR033157	interpro	Cathepsin X	1	Q9UBR2
cd09476	CDD	LIM1_TLP	1	P52943
IPR006594	interpro	LIS1 homology motif	1	Q7Z3E5
PR00014	PRINTS	Fibronectin type III repeat signature	1	Q9Y2H6
IPR034450	interpro	Adipogenesis regulatory factor	1	Q15847
IPR024581	interpro	Tbk1/Ikki binding domain	1	Q92844
IPR027854	interpro	Short transmembrane mitochondrial protein 1	1	L0R6Q1
IPR007111	interpro	NACHT nucleoside triphosphatase	1	Q86W25
IPR004020	interpro	DAPIN domain	1	Q86W25
cd08320	CDD	Pyrin_NALPs	1	Q86W25
cd14237	CDD	GAT_TM1L1	1	O75674
IPR027428	interpro	TOM1-like protein 1	1	O75674
IPR038425	interpro	GAT domain superfamily	1	O75674
IPR002014	interpro	VHS domain	1	O75674
IPR008942	interpro	ENTH/VHS	1	O75674
IPR004152	interpro	GAT domain	1	O75674
IPR014645	interpro	Target of Myb protein 1	1	O75674
cd03565	CDD	VHS_Tom1	1	O75674
IPR005607	interpro	BSD domain	1	Q9NW68
IPR035925	interpro	BSD domain superfamily	1	Q9NW68
IPR011128	interpro	Glycerol-3-phosphate dehydrogenase, NAD-dependent, N-terminal	1	P21695
IPR006168	interpro	Glycerol-3-phosphate dehydrogenase, NAD-dependent	1	P21695
IPR017751	interpro	Glycerol-3-phosphate dehydrogenase, NAD-dependent, eukaryotic	1	P21695
IPR036291	interpro	NAD(P)-binding domain superfamily	8	P21695 Q9Y394 Q96LJ7 O95479 Q16698 Q96C36 Q658P3 Q6UWP2
IPR006109	interpro	Glycerol-3-phosphate dehydrogenase, NAD-dependent, C-terminal	1	P21695
IPR008927	interpro	6-phosphogluconate dehydrogenase-like, C-terminal domain superfamily	2	P21695 Q96C36
IPR013328	interpro	6-phosphogluconate dehydrogenase, domain 2	1	P21695
IPR022065	interpro	Uncharacterised protein family, TMEM59	1	Q9BXS4
IPR011162	interpro	MHC classes I/II-like antigen recognition protein	6	P10321 P04439 P13747 Q9BZM5 P01889 Q9BZM4
IPR003597	interpro	Immunoglobulin C1-set	5	P10321 P04439 P13747 P61769 P01889
IPR010579	interpro	MHC class I, alpha chain, C-terminal	4	P10321 P04439 P13747 P01889
IPR037055	interpro	MHC class I-like antigen recognition-like superfamily	6	P10321 P04439 P13747 Q9BZM5 P01889 Q9BZM4
IPR001039	interpro	MHC class I alpha chain, alpha1 alpha2 domains	4	P10321 P04439 P13747 P01889
cd07698	CDD	IgC_MHC_I_alpha3	4	P10321 P04439 P13747 P01889
IPR011161	interpro	MHC class I-like antigen recognition-like	6	P10321 P04439 P13747 Q9BZM5 P01889 Q9BZM4
IPR034113	interpro	Golgi-associated plant pathogenesis-related protein 1, SCP domain	1	Q9H4G4
IPR011697	interpro	Peptidase C26	1	Q92820
IPR015527	interpro	Peptidase C26, gamma-glutamyl hydrolase	1	Q92820
cd01747	CDD	GATase1_Glutamyl_Hydrolase	1	Q92820
IPR029062	interpro	Class I glutamine amidotransferase-like	1	Q92820
IPR005024	interpro	Snf7 family	3	Q9UQN3 O43633 Q9Y3E7
IPR003006	interpro	Immunoglobulin/major histocompatibility complex, conserved site	4	P04439 P13747 P61769 P01889
IPR029760	interpro	Glutathione peroxidase conserved site	2	Q8TED1 P07203
IPR000889	interpro	Glutathione peroxidase	2	Q8TED1 P07203
IPR013376	interpro	Glutathione peroxidase Gpx7, putative	1	Q8TED1
IPR015898	interpro	G-protein gamma-like domain	1	P63218
IPR036284	interpro	G-protein gamma-like domain superfamily	1	P63218
IPR001770	interpro	G-protein, gamma subunit	1	P63218
IPR039083	interpro	cAMP-dependent protein kinase catalytic subunit beta	1	P22694
IPR000961	interpro	AGC-kinase, C-terminal	1	P22694
cd14209	CDD	STKc_PKA	1	P22694
IPR029035	interpro	DHS-like NAD/FAD-binding domain superfamily	1	Q9UJ83
IPR011766	interpro	Thiamine pyrophosphate enzyme, C-terminal TPP-binding	1	Q9UJ83
IPR012001	interpro	Thiamine pyrophosphate enzyme, N-terminal TPP-binding domain	1	Q9UJ83
cd02004	CDD	TPP_BZL_OCoD_HPCL	1	Q9UJ83
IPR012000	interpro	Thiamine pyrophosphate enzyme, central domain	1	Q9UJ83
IPR029061	interpro	Thiamin diphosphate-binding fold	1	Q9UJ83
cd07035	CDD	TPP_PYR_POX_like	1	Q9UJ83
IPR036020	interpro	WW domain superfamily	2	P46934 Q13526
IPR001202	interpro	WW domain	2	P46934 Q13526
IPR035983	interpro	HECT, E3 ligase catalytic domain	1	P46934
IPR035892	interpro	C2 domain superfamily	3	P46934 Q9H0E2 Q15147
IPR000569	interpro	HECT domain	1	P46934
IPR002347	interpro	Short-chain dehydrogenase/reductase SDR	4	Q9Y394 Q96LJ7 Q16698 Q6UWP2
cd05332	CDD	11beta-HSD1_like_SDR_c	1	Q9Y394
IPR020904	interpro	Short-chain dehydrogenase/reductase, conserved site	2	Q9Y394 Q6UWP2
IPR021852	interpro	Domain of unknown function DUF3456	1	Q96HD1
IPR019378	interpro	GDP-fucose protein O-fucosyltransferase	1	Q9Y2G5
cd11298	CDD	O-FucT-2	1	Q9Y2G5
IPR014644	interpro	Protein arginine N-methyltransferase PRMT7	1	Q9NVM4
IPR025799	interpro	Protein arginine N-methyltransferase	1	Q9NVM4
IPR029063	interpro	S-adenosyl-L-methionine-dependent methyltransferase	3	Q9NVM4 P26358 Q9UNQ2
PF06325	Pfam	Ribosomal protein L11 methyltransferase (PrmA)	1	Q9NVM4
cd02440	CDD	AdoMet_MTases	2	Q9NVM4 Q9UNQ2
IPR004241	interpro	Autophagy protein Atg8 ubiquitin-like	1	O95166
IPR027267	interpro	AH/BAR domain superfamily	4	Q96RF0 Q9NQY0 Q9ULH1 Q9H939
IPR001683	interpro	Phox homologous domain	1	Q96RF0
IPR036871	interpro	PX domain superfamily	1	Q96RF0
IPR036028	interpro	SH3-like domain superfamily	3	Q96RF0 Q9Y5K6 Q9ULH1
IPR014536	interpro	Sorting nexin 9 family	1	Q96RF0
IPR035557	interpro	Sorting nexin-18, SH3 domain	1	Q96RF0
IPR039358	interpro	Sorting nexin-like	1	Q96RF0
IPR001452	interpro	SH3 domain	3	Q96RF0 Q9Y5K6 Q9ULH1
IPR019497	interpro	Sorting nexin protein, WASP-binding domain	1	Q96RF0
IPR035703	interpro	SNX18, PX domain	1	Q96RF0
cd09763	CDD	DHRS1-like_SDR_c	1	Q96LJ7
IPR036188	interpro	FAD/NAD(P)-binding domain superfamily	2	Q8NBM8 Q9Y2Z9
PF13450	Pfam	NAD(P)-binding Rossmann-like domain	1	Q8NBM8
IPR017046	interpro	Prenylcysteine oxidase	1	Q8NBM8
IPR010795	interpro	Prenylcysteine lyase	1	Q8NBM8
PF13424	Pfam	Tetratricopeptide repeat	1	P09914
IPR024121	interpro	Interferon-induced protein with tetratricopeptide repeats 1	1	P09914
IPR001563	interpro	Peptidase S10, serine carboxypeptidase	2	P10619 Q9H3G5
IPR018202	interpro	Serine carboxypeptidase, serine active site	2	P10619 Q9H3G5
IPR033124	interpro	Serine carboxypeptidases, histidine active site	1	P10619
IPR029058	interpro	Alpha/Beta hydrolase fold	4	P10619 P27487 Q96DG6 Q9H3G5
IPR009542	interpro	Microsomal signal peptidase 12kDa subunit	1	Q9Y6A9
IPR037713	interpro	Signal peptidase complex subunit Spc1	1	Q9Y6A9
IPR000533	interpro	Tropomyosin	1	P09493
PF13522	Pfam	Glutamine amidotransferase domain	1	O94808
IPR035466	interpro	GlmS/AgaS, SIS domain 1	1	O94808
IPR001347	interpro	Sugar isomerase (SIS)	1	O94808
IPR029055	interpro	Nucleophile aminohydrolases, N-terminal	2	O94808 P28062
IPR005855	interpro	Glucosamine-fructose-6-phosphate aminotransferase, isomerising	1	O94808
IPR035490	interpro	GlmS/FrlB, SIS domain 2	1	O94808
cd00714	CDD	GFAT	1	O94808
IPR017932	interpro	Glutamine amidotransferase type 2 domain	1	O94808
IPR026637	interpro	YIP1 family member 3	1	Q9GZM5
IPR011685	interpro	LETM1-like	1	Q6P1Q0
IPR033122	interpro	Letm1 ribosome-binding domain	1	Q6P1Q0
IPR000308	interpro	14-3-3 protein	1	P31947
IPR037435	interpro	14-3-3 protein sigma	1	P31947
IPR036815	interpro	14-3-3 domain superfamily	1	P31947
IPR023409	interpro	14-3-3 protein, conserved site	1	P31947
IPR023410	interpro	14-3-3 domain	1	P31947
cd14735	CDD	BACK_Kelch	2	Q9H2C0 Q8NAB2
IPR011705	interpro	BTB/Kelch-associated	2	Q9H2C0 Q8NAB2
IPR017096	interpro	BTB-kelch protein	2	Q9H2C0 Q8NAB2
IPR015915	interpro	Kelch-type beta propeller	2	Q9H2C0 Q8NAB2
IPR030579	interpro	Gigaxonin	1	Q9H2C0
IPR006652	interpro	Kelch repeat type 1	2	Q9H2C0 Q8NAB2
IPR017904	interpro	ADF/Cofilin	1	Q9Y281
IPR002108	interpro	Actin-depolymerising factor homology domain	1	Q9Y281
IPR029006	interpro	ADF-H/Gelsolin-like domain superfamily	1	Q9Y281
IPR023394	interpro	Sec7, C-terminal domain superfamily	1	Q9Y6D6
IPR032691	interpro	Guanine nucleotide exchange factor, N-terminal	1	Q9Y6D6
IPR032629	interpro	Mon2, dimerisation and cyclophilin-binding domain	1	Q9Y6D6
IPR015403	interpro	Sec7, C-terminal	1	Q9Y6D6
IPR000904	interpro	Sec7 domain	1	Q9Y6D6
IPR035999	interpro	Sec7 domain superfamily	1	Q9Y6D6
IPR030646	interpro	Septin 8	1	Q92599
IPR016491	interpro	Septin	1	Q92599
IPR030379	interpro	Septin-type guanine nucleotide-binding (G) domain	1	Q92599
IPR019392	interpro	Mitoguardin	1	Q8NAN2
IPR000953	interpro	Chromo/chromo shadow domain	2	P45973 Q13185
IPR023779	interpro	Chromo domain, conserved site	2	P45973 Q13185
IPR017984	interpro	Chromo domain subgroup	2	P45973 Q13185
IPR008251	interpro	Chromo shadow domain	2	P45973 Q13185
IPR023780	interpro	Chromo domain	2	P45973 Q13185
IPR016197	interpro	Chromo-like domain superfamily	2	P45973 Q13185
IPR002640	interpro	Arylesterase	1	Q15165
IPR008364	interpro	Paraoxonase2	1	Q15165
IPR019319	interpro	Protein of unknown function DUF2368	1	Q9HBL7
IPR015707	interpro	Beta-2-Microglobulin	1	P61769
cd05770	CDD	IgC_beta2m	1	P61769
IPR000306	interpro	FYVE zinc finger	1	Q9BQS8
IPR009038	interpro	GOLD domain	1	Q9BQS8
cd15726	CDD	FYVE_FYCO1	1	Q9BQS8
IPR017455	interpro	Zinc finger, FYVE-related	1	Q9BQS8
IPR004012	interpro	RUN domain	1	Q9BQS8
IPR011011	interpro	Zinc finger, FYVE/PHD-type	2	Q9BQS8 Q96T88
IPR036598	interpro	GOLD domain superfamily	1	Q9BQS8
IPR037213	interpro	RUN domain superfamily	1	Q9BQS8
IPR017452	interpro	GPCR, rhodopsin-like, 7TM	1	P55085
IPR000276	interpro	G protein-coupled receptor, rhodopsin-like	1	P55085
IPR003912	interpro	Protease-activated receptor	1	P55085
IPR002281	interpro	Protease-activated receptor 2	1	P55085
cd15370	CDD	7tmA_PAR2	1	P55085
IPR026298	interpro	Blc2 family	1	Q16611
IPR020717	interpro	Apoptosis regulator, Bcl-2, BH1 motif, conserved site	1	Q16611
IPR026308	interpro	Apoptosis regulator BAK	1	Q16611
cd06845	CDD	Bcl-2_like	1	Q16611
IPR036834	interpro	Blc2-like superfamily	1	Q16611
IPR020728	interpro	Apoptosis regulator, Bcl-2, BH3 motif, conserved site	1	Q16611
IPR020726	interpro	Apoptosis regulator, Bcl-2, BH2 motif, conserved site	1	Q16611
IPR002475	interpro	Bcl2-like	1	Q16611
IPR000511	interpro	Cytochrome c/c1 haem-lyase	1	P53701
IPR026776	interpro	Uncharacterised protein family UPF0729	1	Q8TCD1
IPR008408	interpro	Brain acid soluble protein 1	1	P80723
IPR012936	interpro	Endoplasmic reticulum vesicle transporter, C-terminal	2	Q9Y282 Q96RQ1
PF13850	Pfam	Endoplasmic Reticulum-Golgi Intermediate Compartment (ERGIC)	2	Q9Y282 Q96RQ1
IPR037171	interpro	NagB/RpiA transferase-like	1	O95479
IPR005900	interpro	6-phosphogluconolactonase, DevB-type	1	O95479
IPR022675	interpro	Glucose-6-phosphate dehydrogenase, C-terminal	1	O95479
IPR001282	interpro	Glucose-6-phosphate dehydrogenase	1	O95479
IPR006148	interpro	Glucosamine/galactosamine-6-phosphate isomerase	1	O95479
IPR022674	interpro	Glucose-6-phosphate dehydrogenase, NAD-binding	1	O95479
IPR019796	interpro	Glucose-6-phosphate dehydrogenase, active site	1	O95479
IPR008913	interpro	Zinc finger, CHY-type	1	Q96PM5
IPR037275	interpro	Zinc finger, CTCHY-type superfamily	1	Q96PM5
cd16464	CDD	RING-H2_Pirh2	1	Q96PM5
PF14599	Pfam	Zinc-ribbon	1	Q96PM5
IPR017921	interpro	Zinc finger, CTCHY-type	1	Q96PM5
IPR037274	interpro	Zinc finger, CHY-type superfamily	1	Q96PM5
IPR011050	interpro	Pectin lyase fold/virulence factor	1	Q9UHN6
IPR019316	interpro	G8 domain	1	Q9UHN6
cd13938	CDD	PANDER_like_TMEM2	1	Q9UHN6
IPR028343	interpro	Fructose-1,6-bisphosphatase	1	P09467
IPR000146	interpro	Fructose-1,6-bisphosphatase class 1	1	P09467
IPR020548	interpro	Fructose-1,6-bisphosphatase, active site	1	P09467
IPR033391	interpro	Fructose-1-6-bisphosphatase class I, N-terminal	1	P09467
IPR006091	interpro	Acyl-CoA oxidase/dehydrogenase, central domain	3	Q15067 P49748 P16219
IPR002655	interpro	Acyl-CoA oxidase, C-terminal	1	Q15067
IPR012258	interpro	Acyl-CoA oxidase	1	Q15067
IPR036250	interpro	Acyl-CoA dehydrogenase-like, C-terminal	3	Q15067 P49748 P16219
IPR029320	interpro	Acyl-coenzyme A oxidase, N-terminal	1	Q15067
IPR009100	interpro	Acyl-CoA dehydrogenase/oxidase, N-terminal and middle domain superfamily	3	Q15067 P49748 P16219
IPR034171	interpro	Peroxisomal acyl-coenzyme A oxidase	1	Q15067
IPR037069	interpro	Acyl-CoA dehydrogenase/oxidase, N-terminal domain superfamily	3	Q15067 P49748 P16219
IPR000938	interpro	CAP Gly-rich domain	1	P30622
IPR036859	interpro	CAP Gly-rich domain superfamily	1	P30622
IPR032108	interpro	CLIP1, zinc knuckle	1	P30622
IPR003191	interpro	Guanylate-binding protein/Atlastin, C-terminal	1	P32456
cd01851	CDD	GBP	1	P32456
IPR015894	interpro	Guanylate-binding protein, N-terminal	1	P32456
IPR036543	interpro	Guanylate-binding protein, C-terminal domain superfamily	1	P32456
IPR030386	interpro	GB1/RHD3-type guanine nucleotide-binding (G) domain	1	P32456
IPR037684	interpro	Guanylate-binding protein, C-terminal	1	P32456
IPR003578	interpro	Small GTPase superfamily, Rho type	1	P08134
cd01870	CDD	RhoA_like	1	P08134
IPR037395	interpro	GSK3B-interacting protein	1	Q9P0R6
IPR007967	interpro	GSKIP domain	1	Q9P0R6
IPR023231	interpro	GSKIP domain superfamily	1	Q9P0R6
IPR004895	interpro	Prenylated rab acceptor PRA1	1	O60831
IPR029973	interpro	Transgelin-3	1	Q9UI15
IPR036872	interpro	CH domain superfamily	3	Q9UI15 Q01995 Q8IVL1
PR00890	PRINTS	Smooth muscle protein 22-alpha (transgelin) signature	2	Q9UI15 Q01995
IPR000557	interpro	Calponin repeat	2	Q9UI15 Q01995
IPR001715	interpro	Calponin homology domain	3	Q9UI15 Q01995 Q8IVL1
IPR003096	interpro	Smooth muscle protein/calponin	2	Q9UI15 Q01995
cd05169	CDD	PIKKc_TOR	1	P42345
IPR036940	interpro	Phosphatidylinositol 3-/4-kinase, catalytic domain superfamily	1	P42345
IPR018936	interpro	Phosphatidylinositol 3/4-kinase, conserved site	1	P42345
IPR000403	interpro	Phosphatidylinositol 3-/4-kinase, catalytic domain	1	P42345
IPR003152	interpro	FATC domain	1	P42345
IPR009076	interpro	FKBP12-rapamycin binding domain	1	P42345
IPR003151	interpro	PIK-related kinase, FAT	1	P42345
IPR024585	interpro	Domain of unknown function DUF3385, target of rapamycin protein	1	P42345
IPR036738	interpro	FKBP12-rapamycin binding domain superfamily	1	P42345
IPR026683	interpro	Serine/threonine-protein kinase TOR	1	P42345
IPR014009	interpro	PIK-related kinase	1	P42345
IPR013270	interpro	CD47 immunoglobulin-like	1	Q08722
IPR037805	interpro	Leukocyte surface antigen CD47, IgV	1	Q08722
IPR013147	interpro	CD47 transmembrane	1	Q08722
IPR006704	interpro	Leukocyte surface antigen CD47	1	Q08722
IPR006012	interpro	Syntaxin/epimorphin, conserved site	1	Q12846
IPR000727	interpro	Target SNARE coiled-coil homology domain	2	Q12846 Q9NYM9
IPR006011	interpro	Syntaxin, N-terminal domain	1	Q12846
cd15883	CDD	SNARE_syntaxin4	1	Q12846
IPR010989	interpro	SNARE	1	Q12846
IPR001507	interpro	Zona pellucida domain	1	P17813
IPR036047	interpro	F-box-like domain superfamily	3	Q9UK22 Q96CD0 O94952
IPR007397	interpro	F-box associated (FBA) domain	1	Q9UK22
IPR008979	interpro	Galactose-binding-like domain superfamily	2	Q9UK22 P29317
IPR001810	interpro	F-box domain	2	Q9UK22 Q96CD0
IPR007273	interpro	SCAMP	1	Q969E2
IPR007249	interpro	Dopey, N-terminal	1	Q9Y3R5
IPR037872	interpro	Rab3	1	O95716
IPR030697	interpro	Ras-related protein Rab29/Rab38/Rab32	2	Q13637 O14966
IPR005293	interpro	Antigen peptide transporter 2	1	Q03519
cd14964	CDD	7tm_GPCRs	1	Q9P2C4
PF06664	Pfam	Wnt-binding factor required for Wnt secretion	1	Q9P2C4
IPR013784	interpro	Carbohydrate-binding-like fold	1	Q15155
IPR014001	interpro	Helicase superfamily 1/2, ATP-binding domain	4	O95786 Q9NVP1 Q9NRZ9 Q9NR30
IPR001650	interpro	Helicase, C-terminal	4	O95786 Q9NVP1 Q9NRZ9 Q9NR30
cd12090	CDD	MDA5_ID	1	O95786
IPR038557	interpro	RIG-I-like receptor, C-terminal domain superfamily	1	O95786
IPR011545	interpro	DEAD/DEAH box helicase domain	3	O95786 Q9NVP1 Q9NR30
IPR021673	interpro	RIG-I-like receptor, C-terminal regulatory domain	1	O95786
cd08817	CDD	CARD_RIG-I_r2	1	O95786
cd15805	CDD	RIG-I_C	1	O95786
cd00046	CDD	DEXDc	2	O95786 Q9NRZ9
IPR031964	interpro	Caspase recruitment domain	1	O95786
IPR002223	interpro	Pancreatic trypsin inhibitor Kunitz domain	1	O43278
IPR036880	interpro	Pancreatic trypsin inhibitor Kunitz domain superfamily	1	O43278
IPR011106	interpro	Seven cysteines, N-terminal	1	O43278
IPR020901	interpro	Proteinase inhibitor I2, Kunitz, conserved site	1	O43278
IPR013980	interpro	MANSC domain	1	O43278
IPR036770	interpro	Ankyrin repeat-containing domain superfamily	2	Q01484 Q9ULH1
IPR000906	interpro	ZU5 domain	1	Q01484
IPR002110	interpro	Ankyrin repeat	2	Q01484 Q9ULH1
PF13857	Pfam	Ankyrin repeats (many copies)	1	Q01484
IPR020683	interpro	Ankyrin repeat-containing domain	2	Q01484 Q9ULH1
cd08804	CDD	Death_ank2	1	Q01484
IPR000488	interpro	Death domain	1	Q01484
PF13637	Pfam	Ankyrin repeats (many copies)	1	Q01484
IPR013787	interpro	S100/CaBP-9k-type, calcium binding, subdomain	1	Q99584
cd05022	CDD	S-100A13	1	Q99584
IPR028487	interpro	Protein S100-A13	1	Q99584
cd15853	CDD	SNARE_Bet1	1	Q9NYM9
IPR005135	interpro	Endonuclease/exonuclease/phosphatase	1	Q6L8Q7
IPR036691	interpro	Endonuclease/exonuclease/phosphatase superfamily	1	Q6L8Q7
PF13561	Pfam	Enoyl-(Acyl carrier protein) reductase	1	Q16698
cd05369	CDD	TER_DECR_SDR_a	1	Q16698
IPR004148	interpro	BAR domain	1	Q9NQY0
IPR037428	interpro	Bridging integrator 3, BAR domain	1	Q9NQY0
IPR008010	interpro	Tapt1 family	1	Q6NXT6
IPR004032	interpro	PMP-22/EMP/MP20	1	P54852
IPR003934	interpro	Epithelial membrane protein EMP-3	1	P54852
IPR007657	interpro	Glycosyltransferase 61	1	Q5NDL2
IPR009582	interpro	Signal peptidase complex subunit 2	1	Q15005
IPR019610	interpro	Iron sulphur domain-containing, mitoNEET, N-terminal	1	Q9NZ45
IPR018967	interpro	Iron sulphur-containing domain, CDGSH-type	1	Q9NZ45
IPR000920	interpro	Myelin P0 protein-related	1	O95297
IPR029870	interpro	Myelin protein zero-like protein 1	1	O95297
cd05715	CDD	Ig_P0-like	1	O95297
IPR019375	interpro	Ribosomal protein S28, mitochondrial	1	Q9Y2Q9
IPR001199	interpro	Cytochrome b5-like heme/steroid binding domain	1	O43169
IPR018506	interpro	Cytochrome b5, heme-binding site	1	O43169
IPR036400	interpro	Cytochrome b5-like heme/steroid binding domain superfamily	1	O43169
IPR006634	interpro	TRAM/LAG1/CLN8 homology domain	1	Q15629
IPR016447	interpro	Translocation associated membrane protein	1	Q15629
IPR013599	interpro	TRAM1-like protein	1	Q15629
IPR007866	interpro	TRIC channel	1	Q9NVV0
IPR038596	interpro	Janus superfamily	1	Q9NRX4
IPR028441	interpro	14kDa phosphohistidine phosphatase	1	Q9NRX4
IPR007702	interpro	Janus	1	Q9NRX4
IPR029759	interpro	Glutathione peroxidase active site	1	P07203
IPR035778	interpro	Heterogeneous nuclear ribonucleoprotein U, SPRY domain	1	Q1KMD3
IPR036361	interpro	SAP domain superfamily	1	Q1KMD3
IPR003034	interpro	SAP domain	1	Q1KMD3
PF13671	Pfam	AAA domain	1	Q1KMD3
cd03161	CDD	TM4SF2_6_like_LEL	1	O43657
IPR031082	interpro	Laminin subunit gamma-2	1	Q13753
IPR000034	interpro	Laminin IV	1	Q13753
IPR018252	interpro	Annexin repeat, conserved site	1	Q5VT79
IPR037104	interpro	Annexin superfamily	1	Q5VT79
IPR009115	interpro	Annexin A8	1	Q5VT79
IPR018502	interpro	Annexin repeat	1	Q5VT79
IPR001464	interpro	Annexin	1	Q5VT79
IPR019383	interpro	Golgin subfamily A member 7/ERF4	1	Q7Z5G4
IPR030747	interpro	Matrilin-2	1	O00339
IPR036337	interpro	Matrilin, coiled-coil domain superfamily	1	O00339
cd01475	CDD	vWA_Matrilin	1	O00339
IPR019466	interpro	Matrilin, coiled-coil trimerisation domain	1	O00339
IPR017968	interpro	Acylphosphatase, conserved site	1	P07311
IPR020456	interpro	Acylphosphatase	1	P07311
IPR001792	interpro	Acylphosphatase-like domain	1	P07311
IPR036046	interpro	Acylphosphatase-like domain superfamily	1	P07311
IPR003172	interpro	MD-2-related lipid-recognition domain	1	P61916
IPR033916	interpro	ML domain, Npc2 like	1	P61916
IPR001107	interpro	Band 7 domain	1	O94905
IPR033294	interpro	Erlin1/2	1	O94905
IPR037351	interpro	COMM domain-containing protein 1	1	Q8N668
IPR033776	interpro	COMMD1 N-terminal domain	1	Q8N668
IPR005181	interpro	Sialate O-acetylesterase domain	1	Q9HAT2
IPR039329	interpro	Sialate O-acetylesterase	1	Q9HAT2
IPR036514	interpro	SGNH hydrolase superfamily	1	Q9HAT2
IPR036857	interpro	Thyroglobulin type-1 superfamily	1	P16422
IPR000716	interpro	Thyroglobulin type-1	1	P16422
IPR029976	interpro	Transgelin	1	Q01995
IPR031777	interpro	Sortilin, C-terminal	1	Q99523
IPR031778	interpro	Sortilin, N-terminal	1	Q99523
IPR006581	interpro	VPS10	1	Q99523
IPR038508	interpro	ArfGAP domain superfamily	2	Q9NP61 Q9ULH1
IPR001164	interpro	Arf GTPase activating protein	2	Q9NP61 Q9ULH1
IPR037278	interpro	ARFGAP/RecO-like zinc finger	2	Q9NP61 Q9ULH1
IPR015497	interpro	Epidermal growth factor receptor ligand	1	P15514
cd09528	CDD	SAM_Samd9_Samd9L	1	Q5K651
IPR009060	interpro	UBA-like superfamily	1	Q9H0E2
IPR037301	interpro	Toll-interacting protein, C2 domain	1	Q9H0E2
IPR003892	interpro	Ubiquitin system component Cue	1	Q9H0E2
IPR000008	interpro	C2 domain	2	Q9H0E2 Q15147
cd14363	CDD	CUE_TOLIP	1	Q9H0E2
IPR037667	interpro	Protein FMC1 homologue	1	Q96HJ9
IPR000542	interpro	Acyltransferase ChoActase/COT/CPT	1	P43155
IPR005016	interpro	Serine incorporator/TMS membrane protein	1	Q13530
IPR029557	interpro	Serine incorporator 3	1	Q13530
IPR036348	interpro	WIBG, N-terminal domain superfamily	1	Q9BRP8
IPR015362	interpro	WIBG, Mago-binding	1	Q9BRP8
IPR039333	interpro	Partner of Y14 and mago	1	Q9BRP8
IPR011893	interpro	Selenoprotein, Rdx-type	1	P62341
IPR019389	interpro	Selenoprotein T	1	P62341
cd02186	CDD	alpha_tubulin	2	Q71U36 A6NHL2
IPR002452	interpro	Alpha tubulin	2	Q71U36 A6NHL2
IPR002500	interpro	Phosphoadenosine phosphosulphate reductase	1	Q8NFF5
IPR001453	interpro	MoaB/Mog domain	1	Q8NFF5
IPR012183	interpro	FAD synthetase with the MoaB/Mog domain	1	Q8NFF5
IPR036425	interpro	MoaB/Mog-like domain superfamily	1	Q8NFF5
IPR014729	interpro	Rossmann-like alpha/beta/alpha sandwich fold	3	Q8NFF5 Q7Z7A3 Q13057
IPR003323	interpro	OTU domain	2	Q5VVQ6 Q96DC9
IPR039138	interpro	Ubiquitin thioesterase OTU1	1	Q5VVQ6
IPR013087	interpro	Zinc finger C2H2-type	4	Q5VVQ6 P17026 Q9BWE0 Q92766
IPR027101	interpro	CD59 glycoprotein	1	P13987
IPR016054	interpro	Ly-6 antigen/uPA receptor-like	1	P13987
IPR018363	interpro	CD59 antigen, conserved site	1	P13987
cd00117	CDD	LU	1	P13987
IPR035705	interpro	Proteasome subunit beta type 8	1	P28062
IPR001353	interpro	Proteasome, subunit alpha/beta	1	P28062
IPR016050	interpro	Proteasome beta-type subunit, conserved site	1	P28062
IPR000243	interpro	Peptidase T1A, proteasome beta-subunit	1	P28062
cd03761	CDD	proteasome_beta_type_5	1	P28062
IPR023333	interpro	Proteasome B-type subunit	1	P28062
IPR009684	interpro	Proteinase inhibitor I47, latexin	1	Q9BS40
IPR038554	interpro	Dipeptidylpeptidase IV, N-terminal domain superfamily	1	P27487
IPR001375	interpro	Peptidase S9, prolyl oligopeptidase, catalytic domain	1	P27487
IPR002469	interpro	Dipeptidylpeptidase IV, N-terminal domain	1	P27487
IPR002471	interpro	Peptidase S9, serine active site	1	P27487
IPR011993	interpro	PH-like domain superfamily	4	Q6F5E8 Q9NVZ3 Q9ULH1 Q53GA4
IPR029763	interpro	F-actin-uncapping protein RLTPR	1	Q6F5E8
IPR031943	interpro	CARMIL, C-terminal domain	1	Q6F5E8
IPR019400	interpro	Peptidase C65, otubain	1	Q96DC9
IPR030299	interpro	Ubiquitin thioesterase OTUB2	1	Q96DC9
IPR016615	interpro	Ubiquitin thioesterase Otubain	1	Q96DC9
IPR012466	interpro	NECAP, PHear domain	1	Q9NVZ3
IPR015424	interpro	Pyridoxal phosphate-dependent transferase	1	Q9Y617
IPR022278	interpro	Phosphoserine aminotransferase	1	Q9Y617
IPR000192	interpro	Aminotransferase class V domain	1	Q9Y617
IPR015421	interpro	Pyridoxal phosphate-dependent transferase, major domain	1	Q9Y617
IPR020578	interpro	Aminotransferase class-V, pyridoxal-phosphate binding site	1	Q9Y617
IPR015422	interpro	Pyridoxal phosphate-dependent transferase domain 1	1	Q9Y617
IPR007259	interpro	Gamma-tubulin complex component protein	1	Q96RT7
IPR020818	interpro	GroES chaperonin family	1	P61604
IPR037124	interpro	GroES chaperonin superfamily	1	P61604
IPR018369	interpro	Chaperonin GroES, conserved site	1	P61604
IPR011032	interpro	GroES-like superfamily	1	P61604
IPR002219	interpro	Protein kinase C-like, phorbol ester/diacylglycerol-binding domain	1	P04049
IPR003116	interpro	Raf-like Ras-binding	1	P04049
cd14149	CDD	STKc_C-Raf	1	P04049
cd01816	CDD	Raf_RBD	1	P04049
IPR020454	interpro	Diacylglycerol/phorbol-ester binding	1	P04049
IPR035776	interpro	CD2-associated protein, second SH3 domain	1	Q9Y5K6
IPR028445	interpro	CD2-associated protein	1	Q9Y5K6
IPR035775	interpro	CD2-associated protein, first SH3 domain	1	Q9Y5K6
IPR035777	interpro	CD2-associated protein, third SH3 domain	1	Q9Y5K6
IPR007696	interpro	DNA mismatch repair protein MutS, core	1	P43246
IPR007861	interpro	DNA mismatch repair protein MutS, clamp	1	P43246
IPR000432	interpro	DNA mismatch repair protein MutS, C-terminal	1	P43246
IPR007695	interpro	DNA mismatch repair protein MutS-like, N-terminal	1	P43246
IPR036187	interpro	DNA mismatch repair protein MutS, core domain superfamily	1	P43246
cd03285	CDD	ABC_MSH2_euk	1	P43246
IPR016151	interpro	DNA mismatch repair protein MutS, N-terminal	1	P43246
IPR036678	interpro	MutS, connector domain superfamily	1	P43246
IPR011184	interpro	DNA mismatch repair Msh2-type	1	P43246
IPR032642	interpro	DNA mismatch repair protein Msh2	1	P43246
IPR007860	interpro	DNA mismatch repair protein MutS, connector domain	1	P43246
IPR000541	interpro	Cytoplasmic tRNA 2-thiolation protein 1	1	Q7Z7A3
IPR011063	interpro	tRNA(Ile)-lysidine/2-thiocytidine synthase, N-terminal	1	Q7Z7A3
IPR032442	interpro	Cytoplasmic tRNA 2-thiolation protein 1, C-terminal	1	Q7Z7A3
cd01993	CDD	Alpha_ANH_like_II	1	Q7Z7A3
IPR035107	interpro	tRNA thiolation protein, TtcA/Ctu1 type	1	Q7Z7A3
IPR036264	interpro	Bacterial exopeptidase dimerisation domain	1	Q8IYS1
IPR011650	interpro	Peptidase M20, dimerisation domain	1	Q8IYS1
IPR017144	interpro	Peptidase M20A, amidohydrolase, predicted	1	Q8IYS1
IPR002933	interpro	Peptidase M20	1	Q8IYS1
IPR036915	interpro	Cyclin-like superfamily	2	P20248 P14635
IPR006671	interpro	Cyclin, N-terminal	2	P20248 P14635
IPR004367	interpro	Cyclin, C-terminal domain	2	P20248 P14635
IPR013763	interpro	Cyclin-like	2	P20248 P14635
IPR039361	interpro	Cyclin	2	P20248 P14635
IPR032447	interpro	Cyclin-A, N-terminal	1	P20248
IPR028939	interpro	Pyrroline-5-carboxylate reductase, catalytic, N-terminal	2	Q96C36 Q658P3
IPR000304	interpro	Pyrroline-5-carboxylate reductase	1	Q96C36
IPR029036	interpro	Pyrroline-5-carboxylate reductase, dimerisation domain	1	Q96C36
IPR002051	interpro	Haem oxygenase	1	P09601
IPR016053	interpro	Haem oxygenase-like	1	P09601
IPR016084	interpro	Haem oxygenase-like, multi-helical	1	P09601
IPR018207	interpro	Haem oxygenase conserved site	1	P09601
IPR006089	interpro	Acyl-CoA dehydrogenase, conserved site	2	P49748 P16219
IPR009075	interpro	Acyl-CoA dehydrogenase/oxidase C-terminal	2	P49748 P16219
cd01161	CDD	VLCAD	1	P49748
IPR013786	interpro	Acyl-CoA dehydrogenase/oxidase, N-terminal	2	P49748 P16219
cd01158	CDD	SCAD_SBCAD	1	P16219
IPR033367	interpro	BRI3-binding protein	1	Q8WY22
PF14965	Pfam	Negative regulator of p53/TP53	1	Q8WY22
IPR007238	interpro	DNA primase large subunit, eukaryotic/archaeal	1	P49643
IPR016558	interpro	DNA primase, large subunit, eukaryotic	1	P49643
IPR036873	interpro	Rhodanese-like domain superfamily	1	P28562
IPR016130	interpro	Protein-tyrosine phosphatase, active site	1	P28562
IPR029021	interpro	Protein-tyrosine phosphatase-like	1	P28562
IPR020422	interpro	Dual specificity protein phosphatase domain	1	P28562
IPR003595	interpro	Protein-tyrosine phosphatase, catalytic	1	P28562
cd01446	CDD	DSP_MapKP	1	P28562
IPR000340	interpro	Dual specificity phosphatase, catalytic domain	1	P28562
IPR001763	interpro	Rhodanese-like domain	1	P28562
IPR024950	interpro	Dual specificity phosphatase	1	P28562
IPR008343	interpro	Mitogen-activated protein (MAP) kinase phosphatase	1	P28562
IPR020417	interpro	Atypical dual specificity phosphatase	1	P28562
IPR000387	interpro	Tyrosine specific protein phosphatases domain	1	P28562
IPR036961	interpro	Kinesin motor domain superfamily	2	Q14807 O95235
IPR001752	interpro	Kinesin motor domain	2	Q14807 O95235
PF12836	Pfam	Helix-hairpin-helix motif	1	Q14807
cd01376	CDD	KISc_KID_like	1	Q14807
IPR003583	interpro	Helix-hairpin-helix DNA-binding motif, class 1	1	Q14807
IPR026986	interpro	Kinesin-like protein KIF22 (Kid)	1	Q14807
IPR019821	interpro	Kinesin motor domain, conserved site	2	Q14807 O95235
IPR010994	interpro	RuvA domain 2-like	1	Q14807
IPR027640	interpro	Kinesin-like protein	2	Q14807 O95235
IPR013865	interpro	Protein of unknown function DUF1754, eukaryotic	1	Q9Y421
IPR013130	interpro	Ferric reductase transmembrane component-like domain	1	Q658P3
IPR001680	interpro	WD40 repeat	3	Q15334 Q9GZL7 Q8NFP9
IPR000664	interpro	Lethal(2) giant larvae protein	1	Q15334
IPR036322	interpro	WD40-repeat-containing domain superfamily	3	Q15334 Q9GZL7 Q8NFP9
IPR013577	interpro	Lethal giant larvae homologue 2	1	Q15334
IPR019775	interpro	WD40 repeat, conserved site	2	Q15334 Q9GZL7
IPR029704	interpro	UPF0428 family	1	Q9H5V9
cd14122	CDD	STKc_VRK1	1	Q99986
IPR014014	interpro	RNA helicase, DEAD-box type, Q motif	2	Q9NVP1 Q9NR30
IPR025313	interpro	Domain of unknown function DUF4217	1	Q9NVP1
cd00268	CDD	DEADc	2	Q9NVP1 Q9NR30
IPR000629	interpro	ATP-dependent RNA helicase DEAD-box, conserved site	1	Q9NVP1
IPR036458	interpro	Sodium:dicarboxylate symporter superfamily	1	Q15758
IPR018107	interpro	Sodium:dicarboxylate symporter, conserved site	1	Q15758
PR00173	PRINTS	Glutamate-aspartate symporter signature	1	Q15758
IPR001991	interpro	Sodium:dicarboxylate symporter	1	Q15758
cd06617	CDD	PKc_MKK3_6	1	P46734
IPR036236	interpro	Zinc finger C2H2 superfamily	4	P17026 O60870 Q9BWE0 Q92766
PF00096	Pfam	Zinc finger, C2H2 type	3	P17026 Q9BWE0 Q92766
IPR036578	interpro	SMAD MH1 domain superfamily	2	P84022 Q99717
cd10985	CDD	MH2_SMAD_2_3	1	P84022
IPR013790	interpro	Dwarfin	2	P84022 Q99717
IPR013019	interpro	MAD homology, MH1	2	P84022 Q99717
cd10491	CDD	MH1_SMAD_2_3	1	P84022
IPR017855	interpro	SMAD-like domain superfamily	2	P84022 Q99717
IPR001132	interpro	SMAD domain, Dwarfin-type	2	P84022 Q99717
IPR003619	interpro	MAD homology 1, Dwarfin-type	2	P84022 Q99717
IPR008984	interpro	SMAD/FHA domain superfamily	2	P84022 Q99717
IPR005946	interpro	Ribose-phosphate pyrophosphokinase	1	P11908
IPR037515	interpro	Ribose-phosphate pyrophosphokinase, bacterial-type	1	P11908
IPR029057	interpro	Phosphoribosyltransferase-like	1	P11908
IPR000836	interpro	Phosphoribosyltransferase domain	1	P11908
IPR000842	interpro	Phosphoribosyl pyrophosphate synthetase, conserved site	1	P11908
IPR029099	interpro	Ribose-phosphate pyrophosphokinase, N-terminal domain	1	P11908
IPR018816	interpro	Cactin, central domain	1	Q8WUQ7
IPR019134	interpro	Cactin, C-terminal	1	Q8WUQ7
PF16746	Pfam	BAR domain of APPL family	1	Q9ULH1
IPR001849	interpro	Pleckstrin homology domain	2	Q9ULH1 Q53GA4
IPR038016	interpro	ASAP1, SH3 domain	1	Q9ULH1
IPR037928	interpro	ASAP1, BAR domain	1	Q9ULH1
IPR037844	interpro	ASAP, PH domain	1	Q9ULH1
IPR007109	interpro	Brix domain	1	Q9H9Y2
IPR036259	interpro	MFS transporter superfamily	1	Q8NBI5
IPR027197	interpro	Solute carrier family 43 member 3	1	Q8NBI5
IPR011701	interpro	Major facilitator superfamily	1	Q8NBI5
IPR019137	interpro	Nck-associated protein 1	1	P55160
IPR001525	interpro	C-5 cytosine methyltransferase	1	P26358
IPR017198	interpro	DNA (cytosine-5)-methyltransferase 1-like	1	P26358
IPR002857	interpro	Zinc finger, CXXC-type	1	P26358
IPR018117	interpro	DNA methylase, C-5 cytosine-specific, active site	1	P26358
IPR031303	interpro	DNA methylase, C-5 cytosine-specific, conserved site	1	P26358
IPR010506	interpro	DMAP1-binding domain	1	P26358
cd04711	CDD	BAH_Dnmt1_II	1	P26358
cd04760	CDD	BAH_Dnmt1_I	1	P26358
IPR001025	interpro	Bromo adjacent homology (BAH) domain	1	P26358
IPR022702	interpro	DNA (cytosine-5)-methyltransferase 1, replication foci domain	1	P26358
cd00034	CDD	ChSh	1	Q13185
IPR038033	interpro	Chromobox protein homologue 3	1	Q13185
IPR011722	interpro	Hemimethylated DNA-binding domain	1	O94952
IPR036623	interpro	Hemimethylated DNA-binding domain superfamily	1	O94952
IPR032698	interpro	Protein SirB1, N-terminal	1	O94952
IPR013126	interpro	Heat shock protein 70 family	1	Q0VDF9
IPR018181	interpro	Heat shock protein 70, conserved site	1	Q0VDF9
cd10238	CDD	HSPA14-like_NBD	1	Q0VDF9
IPR029047	interpro	Heat shock protein 70kD, peptide-binding domain superfamily	1	Q0VDF9
cd14214	CDD	PKc_CLK3	1	P49761
IPR005532	interpro	Sulfatase-modifying factor enzyme	1	Q8NBJ7
IPR016187	interpro	C-type lectin fold	1	Q8NBJ7
cd01390	CDD	HMGB-UBF_HMG-box	2	Q00059 O15347
IPR036910	interpro	High mobility group box domain superfamily	2	Q00059 O15347
IPR009071	interpro	High mobility group box domain	2	Q00059 O15347
PR00450	PRINTS	Recoverin family signature	1	P37235
IPR013497	interpro	DNA topoisomerase, type IA, central	1	Q13472
IPR023406	interpro	DNA topoisomerase, type IA, active site	1	Q13472
IPR013824	interpro	DNA topoisomerase, type IA, central region, subdomain 1	1	Q13472
IPR034144	interpro	DNA topoisomerase 3-like, TOPRIM domain	1	Q13472
IPR023405	interpro	DNA topoisomerase, type IA, core domain	1	Q13472
IPR013826	interpro	DNA topoisomerase, type IA, central region, subdomain 3	1	Q13472
IPR013498	interpro	DNA topoisomerase, type IA, zn finger	1	Q13472
IPR006171	interpro	TOPRIM domain	1	Q13472
IPR003601	interpro	DNA topoisomerase, type IA, domain 2	1	Q13472
IPR003602	interpro	DNA topoisomerase, type IA, DNA-binding domain	1	Q13472
IPR000380	interpro	DNA topoisomerase, type IA	1	Q13472
IPR013825	interpro	DNA topoisomerase, type IA, central region, subdomain 2	1	Q13472
IPR010666	interpro	Zinc finger, GRF-type	1	Q13472
IPR013111	interpro	EGF-like domain, extracellular	1	P24821
IPR033078	interpro	Tenascin-C	1	P24821
PD936484	ProDom	POLYPROTEIN GLYCOPROTEIN M G2 TRANSMEMBRANE NONSTRUCTURAL MEMBRANE CONTAINS: PRECURSOR SIGNAL	1	P24821
IPR017986	interpro	WD40-repeat-containing domain	2	Q9GZL7 Q8NFP9
IPR028599	interpro	WD repeat WDR12/Ytm1	1	Q9GZL7
IPR012972	interpro	NLE	1	Q9GZL7
IPR020472	interpro	G-protein beta WD-40 repeat	1	Q9GZL7
cd00200	CDD	WD40	1	Q9GZL7
IPR002925	interpro	Dienelactone hydrolase	1	Q96DG6
IPR000297	interpro	Peptidyl-prolyl cis-trans isomerase, PpiC-type	1	Q13526
IPR023058	interpro	Peptidyl-prolyl cis-trans isomerase, PpiC-type, conserved site	1	Q13526
IPR020855	interpro	Ureohydrolase, manganese-binding site	1	P78540
IPR014033	interpro	Arginase	1	P78540
cd09989	CDD	Arginase	1	P78540
IPR006035	interpro	Ureohydrolase	1	P78540
IPR023696	interpro	Ureohydrolase domain superfamily	1	P78540
IPR006941	interpro	Ribonuclease CAF1	1	Q9UIV1
IPR020067	interpro	Frizzled domain	1	Q01973
IPR016247	interpro	Tyrosine-protein kinase, receptor ROR	1	Q01973
IPR036790	interpro	Frizzled cysteine-rich domain superfamily	1	Q01973
cd07467	CDD	CRD_TK_ROR1	1	Q01973
cd05090	CDD	PTKc_Ror1	1	Q01973
IPR012459	interpro	Ribosomal RNA-processing protein 15	1	Q9Y3B9
IPR017967	interpro	HMG box A DNA-binding domain, conserved site	1	O15347
IPR031077	interpro	High mobility group protein HMGB3	1	O15347
PR00886	PRINTS	High mobility group (HMG1/HMG2) protein signature	1	O15347
IPR000175	interpro	Sodium:neurotransmitter symporter	1	Q9UN76
IPR037272	interpro	Sodium:neurotransmitter symporter superfamily	1	Q9UN76
cd11501	CDD	SLC6sbd_ATB0	1	Q9UN76
PF05348	Pfam	Proteasome maturation factor UMP1	1	Q9Y244
IPR008012	interpro	Proteasome maturation factor Ump1	1	Q9Y244
IPR023395	interpro	Mitochondrial carrier domain superfamily	1	P12235
IPR002113	interpro	Adenine nucleotide translocator 1	1	P12235
IPR018108	interpro	Mitochondrial substrate/solute carrier	1	P12235
IPR002067	interpro	Mitochondrial carrier protein	1	P12235
IPR000558	interpro	Histone H2B	2	Q99880 Q6DN03
IPR009072	interpro	Histone-fold	7	Q99880 P62805 Q71DI3 Q6DN03 P68431 Q8IUE6 Q6FI13
IPR007125	interpro	Histone H2A/H2B/H3	6	Q99880 Q71DI3 Q6DN03 P68431 Q8IUE6 Q6FI13
IPR011430	interpro	Down-regulated-in-metastasis protein	1	O75691
IPR018972	interpro	Sas10 C-terminal domain	1	Q9NQZ2
IPR007146	interpro	Sas10/Utp3/C1D	1	Q9NQZ2
cd10497	CDD	MH2_SMAD_1_5_9	1	Q99717
cd10490	CDD	MH1_SMAD_1_5_9	1	Q99717
IPR035441	interpro	TFIIS/LEDGF domain superfamily	1	Q96ST2
IPR017923	interpro	Transcription factor IIS, N-terminal	1	Q96ST2
IPR001313	interpro	Pumilio RNA-binding repeat	1	Q15397
IPR012959	interpro	CPL domain	1	Q15397
IPR033133	interpro	Pumilio homology domain	1	Q15397
IPR030045	interpro	Alpha-catulin 1	1	Q9UBT7
IPR036723	interpro	Alpha-catenin/vinculin-like superfamily	1	Q9UBT7
IPR006077	interpro	Vinculin/alpha-catenin	1	Q9UBT7
IPR001033	interpro	Alpha-catenin	1	Q9UBT7
IPR001977	interpro	Dephospho-CoA kinase	1	Q13057
cd02164	CDD	PPAT_CoAS	1	Q13057
IPR004821	interpro	Cytidyltransferase-like domain	1	Q13057
IPR006073	interpro	GTP binding domain	1	Q9BVP2
IPR030378	interpro	Circularly permuted (CP)-type guanine nucleotide-binding (G) domain	1	Q9BVP2
IPR014813	interpro	Guanine nucleotide-binding protein-like 3, N-terminal domain	1	Q9BVP2
cd04178	CDD	Nucleostemin_like	1	Q9BVP2
PF00428	Pfam	60s Acidic ribosomal protein	1	P05386
cd05831	CDD	Ribosomal_P1	1	P05386
IPR027534	interpro	Ribosomal protein L12 family	1	P05386
IPR038716	interpro	Ribosomal protein P1/P2, N-terminal domain	1	P05386
cd03585	CDD	NTR_TIMP	1	P35625
IPR001134	interpro	Netrin domain	1	P35625
IPR001820	interpro	Protease inhibitor I35 (TIMP)	1	P35625
IPR030490	interpro	Tissue inhibitor of metalloproteinase, conserved site	1	P35625
IPR027465	interpro	Proteinase inhibitor I35b (TIMP), C-terminal	1	P35625
IPR015612	interpro	Metalloproteinase inhibitor 3	1	P35625
IPR008993	interpro	Tissue inhibitor of metalloproteinases-like, OB-fold	1	P35625
IPR001090	interpro	Ephrin receptor ligand binding domain	1	P29317
IPR016257	interpro	Ephrin receptor type-A /type-B	1	P29317
IPR011641	interpro	Tyrosine-protein kinase ephrin type A/B receptor-like	1	P29317
IPR001426	interpro	Tyrosine-protein kinase, receptor class V, conserved site	1	P29317
IPR027936	interpro	Ephrin receptor, transmembrane domain	1	P29317
IPR034263	interpro	Ephrin type-A receptor 2, ligand binding domain	1	P29317
cd09543	CDD	SAM_EPH-A2	1	P29317
cd05063	CDD	PTKc_EphR_A2	1	P29317
cd03382	CDD	PAP2_dolichyldiphosphatase	1	Q86YN1
IPR001503	interpro	Glycosyl transferase family 10	1	Q11128
IPR038577	interpro	GT10-like superfamily	1	Q11128
IPR031481	interpro	Fucosyltransferase, N-terminal	1	Q11128
IPR001623	interpro	DnaJ domain	1	Q99543
IPR001005	interpro	SANT/Myb domain	1	Q99543
IPR036869	interpro	Chaperone J-domain superfamily	1	Q99543
IPR017884	interpro	SANT domain	1	Q99543
IPR018253	interpro	DnaJ domain, conserved site	1	Q99543
IPR032003	interpro	Ribosome-associated complex head domain	1	Q99543
IPR009057	interpro	Homeobox-like domain superfamily	1	Q99543
IPR036443	interpro	Zinc finger, RanBP2-type superfamily	1	Q8N488
IPR001876	interpro	Zinc finger, RanBP2-type	1	Q8N488
IPR033774	interpro	Yaf2/RYBP C-terminal binding motif	1	Q8N488
IPR002060	interpro	Squalene/phytoene synthase	1	Q330K2
IPR008949	interpro	Isoprenoid synthase domain superfamily	1	Q330K2
IPR000330	interpro	SNF2-related, N-terminal domain	1	Q9NRZ9
IPR038718	interpro	SNF2-like, N-terminal domain superfamily	1	Q9NRZ9
IPR036157	interpro	dUTPase-like superfamily	1	P33316
IPR029054	interpro	dUTPase-like	1	P33316
IPR033704	interpro	dUTPase, trimeric	1	P33316
IPR008181	interpro	Deoxyuridine triphosphate nucleotidohydrolase	1	P33316
IPR028363	interpro	DNA-directed RNA polymerase, subunit RPB6	1	P61218
IPR020708	interpro	DNA-directed RNA polymerase, 14-18kDa subunit, conserved site	1	P61218
IPR006110	interpro	RNA polymerase, subunit omega/K/RPB6	1	P61218
IPR036161	interpro	RPB6/omega subunit-like superfamily	1	P61218
IPR012293	interpro	RNA polymerase subunit, RPB6/omega	1	P61218
IPR006111	interpro	Archaeal RpoK/eukaryotic RPB6 RNA polymerase subunit	1	P61218
IPR018935	interpro	RIO kinase, conserved site	1	Q9BRS2
IPR017407	interpro	Serine/threonine-protein kinase Rio1	1	Q9BRS2
PF01163	Pfam	RIO1 family	1	Q9BRS2
IPR000687	interpro	RIO kinase	1	Q9BRS2
cd05147	CDD	RIO1_euk	1	Q9BRS2
IPR024156	interpro	Small GTPase superfamily, ARF type	1	P18085
IPR006689	interpro	Small GTPase superfamily, ARF/SAR type	1	P18085
cd04150	CDD	Arf1_5_like	1	P18085
IPR002942	interpro	RNA-binding S4 domain	1	Q9NV31
IPR022801	interpro	Ribosomal protein S4/S9	1	Q9NV31
IPR036986	interpro	RNA-binding S4 domain superfamily	1	Q9NV31
IPR001912	interpro	Ribosomal protein S4/S9, N-terminal	1	Q9NV31
IPR000086	interpro	NUDIX hydrolase domain	1	Q9NZJ9
cd04666	CDD	Nudix_Hydrolase_9	1	Q9NZJ9
IPR020084	interpro	NUDIX hydrolase, conserved site	1	Q9NZJ9
IPR015797	interpro	NUDIX hydrolase-like domain superfamily	1	Q9NZJ9
IPR007677	interpro	Gasdermin	1	P57764
cd00009	CDD	AAA	2	Q8IVL1 Q6PL18
IPR039041	interpro	Nav/unc-53 family	1	Q8IVL1
IPR001163	interpro	LSM domain, eukaryotic/archaea-type	1	O15116
IPR010920	interpro	LSM domain superfamily	2	O15116 Q9BX40
IPR034104	interpro	Sm-like protein Lsm1	1	O15116
IPR035992	interpro	Ricin B-like lectins	1	Q6P9A2
cd02510	CDD	pp-GalNAc-T	1	Q6P9A2
IPR000772	interpro	Ricin B, lectin domain	1	Q6P9A2
IPR000409	interpro	BEACH domain	1	Q8NFP9
PD329443	ProDom	REPEAT WD NEUROBEACHIN MEMBRANE LBA BEIGE-LIKE SPLICING ALTERNATIVE 3D-STRUCTURE TRAFFICKING	1	Q8NFP9
IPR023362	interpro	PH-BEACH domain	1	Q8NFP9
PF13385	Pfam	Concanavalin A-like lectin/glucanases superfamily	1	Q8NFP9
IPR031570	interpro	Domain of unknown function DUF4704	1	Q8NFP9
IPR036372	interpro	BEACH domain superfamily	1	Q8NFP9
IPR010508	interpro	Domain of unknown function DUF1088	1	Q8NFP9
IPR028574	interpro	Transcription factor MafK	1	O60675
IPR004827	interpro	Basic-leucine zipper domain	2	O60675 P15407
cd14717	CDD	bZIP_Maf_small	1	O60675
IPR004826	interpro	Basic leucine zipper domain, Maf-type	1	O60675
IPR008917	interpro	Transcription factor, Skn-1-like, DNA-binding domain superfamily	1	O60675
IPR024874	interpro	Transcription factor Maf family	1	O60675
IPR000959	interpro	POLO box domain	1	P53350
IPR033702	interpro	Polo-like kinase 1, catalytic domain	1	P53350
IPR036947	interpro	POLO box domain superfamily	1	P53350
IPR033695	interpro	Second polo-box domain	1	P53350
IPR033701	interpro	First polo-box domain	1	P53350
IPR026939	interpro	At2g23090-like	1	Q9Y5V0
IPR007513	interpro	Uncharacterised protein family SERF	1	Q9Y5V0
PF12874	Pfam	Zinc-finger of C2H2 type	1	Q9Y5V0
IPR001951	interpro	Histone H4	1	P62805
IPR019809	interpro	Histone H4, conserved site	1	P62805
IPR035425	interpro	CENP-T/Histone H4, histone fold	1	P62805
IPR004823	interpro	TATA box binding protein associated factor (TAF)	1	P62805
IPR000164	interpro	Histone H3/CENP-A	2	Q71DI3 P68431
IPR038254	interpro	KIN17, WH-like domain superfamily	1	O60870
IPR019447	interpro	DNA/RNA-binding protein Kin17, conserved domain	1	O60870
IPR037321	interpro	KIN17-like protein	1	O60870
IPR014722	interpro	Ribosomal protein L2, domain 2	1	O60870
cd13155	CDD	KOW_KIN17	1	O60870
IPR005818	interpro	Linker histone H1/H5, domain H15	4	P07305 Q92522 P10412 P16403
IPR036390	interpro	Winged helix DNA-binding domain superfamily	4	P07305 Q92522 P10412 P16403
IPR036388	interpro	Winged helix-like DNA-binding domain superfamily	4	P07305 Q92522 P10412 P16403
IPR005819	interpro	Histone H5	4	P07305 Q92522 P10412 P16403
IPR008610	interpro	Eukaryotic rRNA processing	1	Q99848
IPR031530	interpro	UPF0688 family	1	Q8IYL3
IPR025609	interpro	Lsm14-like, N-terminal	1	Q9BX40
IPR025761	interpro	FFD box	1	Q9BX40
IPR025762	interpro	DFDF domain	1	Q9BX40
IPR019050	interpro	FDF domain	1	Q9BX40
IPR025768	interpro	TFG box	1	Q9BX40
IPR027496	interpro	1,2-dihydroxy-3-keto-5-methylthiopentene dioxygenase, eukaryotes	1	Q9BV57
IPR011051	interpro	RmlC-like cupin domain superfamily	1	Q9BV57
IPR004313	interpro	Acireductone dioxygenase ARD family	1	Q9BV57
IPR000626	interpro	Ubiquitin domain	2	Q99933 Q96T88
IPR036533	interpro	BAG domain superfamily	1	Q99933
IPR003103	interpro	BAG domain	1	Q99933
cd01812	CDD	BAG1_N	1	Q99933
IPR017093	interpro	Molecular chaperone regulator BAG-1	1	Q99933
IPR033378	interpro	Protein BRICK1	1	Q8WUW1
cd12936	CDD	GUCT_RHII_Gualpha_beta	1	Q9NR30
IPR012562	interpro	GUCT	1	Q9NR30
cd05343	CDD	Mgc4172-like_SDR_c	1	Q6UWP2
IPR003307	interpro	W2 domain	1	Q9Y6E2
cd11560	CDD	W2_eIF5C_like	1	Q9Y6E2
IPR016021	interpro	MIF4G-like domain superfamily	1	Q9Y6E2
cd14213	CDD	PKc_CLK1_4	1	P49759
IPR001737	interpro	Ribosomal RNA adenine methyltransferase KsgA/Erm	1	Q9UNQ2
IPR011530	interpro	Ribosomal RNA adenine dimethylase	1	Q9UNQ2
IPR020596	interpro	Ribosomal RNA adenine methylase transferase, conserved site	1	Q9UNQ2
IPR020598	interpro	Ribosomal RNA adenine methylase transferase, N-terminal	1	Q9UNQ2
PF13909	Pfam	C2H2-type zinc-finger domain	1	Q92766
PF13912	Pfam	C2H2-type zinc finger	1	Q92766
IPR002938	interpro	FAD-binding domain	1	Q9Y2Z9
PR00420	PRINTS	Aromatic-ring hydroxylase (flavoprotein monooxygenase) signature	1	Q9Y2Z9
IPR010971	interpro	Ubiquinone biosynthesis hydroxylase UbiH/COQ6	1	Q9Y2Z9
IPR018168	interpro	Ubiquinone biosynthesis hydroxylase, UbiH/UbiF/VisC/COQ6, conserved site	1	Q9Y2Z9
IPR000689	interpro	Ubiquinone biosynthesis monooxygenase COQ6	1	Q9Y2Z9
IPR007015	interpro	DNA polymerase V	1	Q9BQG0
PF14580	Pfam	Leucine-rich repeat	1	Q92688
IPR003603	interpro	U2A'/phosphoprotein 32 family A, C-terminal	1	Q92688
IPR029815	interpro	Fos-related antigen 1	1	P15407
IPR000837	interpro	AP-1 transcription factor	1	P15407
cd14721	CDD	bZIP_Fos	1	P15407
IPR003347	interpro	JmjC domain	1	Q8IUF8
IPR001487	interpro	Bromodomain	1	Q6PL18
cd05528	CDD	Bromo_AAA	1	Q6PL18
IPR036427	interpro	Bromodomain-like superfamily	1	Q6PL18
IPR003959	interpro	ATPase, AAA-type, core	1	Q6PL18
IPR031252	interpro	ATPase family AAA domain-containing protein 2	1	Q6PL18
IPR003960	interpro	ATPase, AAA-type, conserved site	1	Q6PL18
IPR000818	interpro	TEA/ATTS domain	1	P28347
IPR016361	interpro	Transcriptional enhancer factor, metazoa	1	P28347
IPR038096	interpro	TEA/ATTS domain superfamily	1	P28347
IPR027330	interpro	TPX2 central domain	1	Q9ULW0
IPR027329	interpro	TPX2, C-terminal	1	Q9ULW0
IPR009675	interpro	TPX2	1	Q9ULW0
IPR015128	interpro	Aurora-A binding	1	Q9ULW0
IPR006211	interpro	Furin-like cysteine-rich domain	1	P00533
IPR016245	interpro	Tyrosine protein kinase, EGF/ERB/XmrK receptor	1	P00533
cd05108	CDD	PTKc_EGFR	1	P00533
IPR000494	interpro	Receptor L-domain	1	P00533
cd12093	CDD	TM_ErbB1	1	P00533
IPR036941	interpro	Receptor L-domain superfamily	1	P00533
IPR032778	interpro	Growth factor receptor domain 4	1	P00533
cd16613	CDD	RING-HC_UHRF	1	Q96T88
IPR019787	interpro	Zinc finger, PHD-finger	1	Q96T88
IPR021991	interpro	UHRF1, tandem tudor domain	1	Q96T88
IPR003105	interpro	SRA-YDG	1	Q96T88
cd01797	CDD	NIRF_N	1	Q96T88
IPR036987	interpro	SRA-YDG superfamily	1	Q96T88
IPR001965	interpro	Zinc finger, PHD-type	1	Q96T88
cd15616	CDD	PHD_UHRF1	1	Q96T88
IPR018338	interpro	Carbonic anhydrase, alpha-class, conserved site	1	P00918
IPR023561	interpro	Carbonic anhydrase, alpha-class	1	P00918
IPR036398	interpro	Alpha carbonic anhydrase domain superfamily	1	P00918
IPR001148	interpro	Alpha carbonic anhydrase domain	1	P00918
cd03119	CDD	alpha_CA_I_II_III_XIII	1	P00918
IPR027326	interpro	Kinesin-like protein KIF20A	1	O95235
cd01368	CDD	KISc_KIF23_like	1	O95235
IPR018605	interpro	Sororin protein	1	Q96FF9
IPR038927	interpro	Uncharacterized protein C6orf163	1	Q5TEZ5
IPR002119	interpro	Histone H2A	2	Q8IUE6 Q6FI13
IPR032454	interpro	Histone H2A, C-terminal domain	2	Q8IUE6 Q6FI13
IPR032458	interpro	Histone H2A conserved site	2	Q8IUE6 Q6FI13
IPR006636	interpro	Heat shock chaperonin-binding	1	P50502
IPR034649	interpro	Hsp70-interacting protein, N-terminal	1	P50502
IPR006984	interpro	rRNA-processing protein Fcf1/Utp23	1	Q9Y324
IPR002716	interpro	PIN domain	1	Q9Y324
IPR037503	interpro	rRNA-processing protein Fcf1, PIN domain	1	Q9Y324
IPR029060	interpro	PIN-like domain superfamily	1	Q9Y324
cd00821	CDD	PH	1	Q53GA4
IPR036612	interpro	K Homology domain, type 1 superfamily	1	Q9UNW9
IPR033087	interpro	RNA-binding protein Nova-2	1	Q9UNW9
PS50084	ProSiteProfiles	Type-1 KH domain profile.	1	Q9UNW9
IPR004087	interpro	K Homology domain	1	Q9UNW9
cd02396	CDD	PCBP_like_KH	1	Q9UNW9
IPR004088	interpro	K Homology domain, type 1	1	Q9UNW9
cd00105	CDD	KH-I	1	Q9UNW9
IPR001564	interpro	Nucleoside diphosphate kinase	1	P15531
IPR023005	interpro	Nucleoside diphosphate kinase, active site	1	P15531
IPR034907	interpro	Nucleoside diphosphate kinase-like domain	1	P15531
cd04413	CDD	NDPk_I	1	P15531
IPR036850	interpro	Nucleoside diphosphate kinase-like domain superfamily	1	P15531
IPR001711	interpro	Phospholipase C, phosphatidylinositol-specific, Y domain	1	Q15147
IPR001192	interpro	Phosphoinositide phospholipase C family	1	Q15147
IPR017946	interpro	PLC-like phosphodiesterase, TIM beta/alpha-barrel domain superfamily	1	Q15147
IPR000909	interpro	Phosphatidylinositol-specific phospholipase C, X domain	1	Q15147
cd16211	CDD	EFh_PI-PLCbeta4	1	Q15147
IPR015359	interpro	Phosphoinositide-specific phospholipase C, EF-hand-like domain	1	Q15147
cd08591	CDD	PI-PLCc_beta	1	Q15147
IPR009535	interpro	Phospholipase C-beta, conserved site	1	Q15147
IPR016280	interpro	Phosphatidylinositol-4, 5-bisphosphate phosphodiesterase beta	1	Q15147
cd00275	CDD	C2_PLC_like	1	Q15147
IPR037862	interpro	PLC-beta, PH domain	1	Q15147
IPR000398	interpro	Thymidylate synthase	1	P04818
IPR023451	interpro	Thymidylate synthase/dCMP hydroxymethylase domain	1	P04818
IPR020940	interpro	Thymidylate synthase, active site	1	P04818
IPR036926	interpro	Thymidylate synthase/dCMP hydroxymethylase superfamily	1	P04818
IPR004000	interpro	Actin family	1	P42025
IPR004001	interpro	Actin, conserved site	1	P42025
IPR020902	interpro	Actin/actin-like conserved site	1	P42025
IPR029909	interpro	Actin-related protein 1 family	1	P42025
cd07672	CDD	F-BAR_PSTPIP2	1	Q9H939
IPR001060	interpro	FCH domain	1	Q9H939
IPR030106	interpro	Proline-serine-threonine phosphatase-interacting protein 2	1	Q9H939
IPR031160	interpro	F-BAR domain	1	Q9H939
IPR026756	interpro	Nucleolar and spindle-associated protein 1	1	Q9BXS6
IPR003594	interpro	Histidine kinase/HSP90-like ATPase	1	Q58FF6
IPR037196	interpro	HSP90, C-terminal domain	1	Q58FF6
IPR036890	interpro	Histidine kinase/HSP90-like ATPase superfamily	1	Q58FF6
IPR001404	interpro	Heat shock protein Hsp90 family	1	Q58FF6
IPR020568	interpro	Ribosomal protein S5 domain 2-type fold	1	Q58FF6
IPR020575	interpro	Heat shock protein Hsp90, N-terminal	1	Q58FF6
IPR018613	interpro	Protein of unknown function DUF2052, coiled-coil	1	Q96F63
IPR015876	interpro	Acyl-CoA desaturase	1	O00767
IPR001522	interpro	Fatty acid desaturase type 1, conserved site	1	O00767
IPR019188	interpro	Small nuclear RNA activating complex (SNAPc), subunit SNAP43	1	Q16533

## Sheet: enrichment
ID	Source	Domain	#Diff	FDR	P_Value	Over_Under	DiffSeqs
IPR036179	interpro	Immunoglobulin-like domain superfamily	15	0.00306721	6.80043e-06	Over	O75326 P30530 P43121 P05362 Q13308 P15151 P10321 P04439 Q9Y624 P13747 P61769 Q08722 O95297 P01889 Q01973
IPR011162	interpro	MHC classes I/II-like antigen recognition protein	6	0.00306721	9.14903e-06	Over	P10321 P04439 P13747 Q9BZM5 P01889 Q9BZM4
IPR037055	interpro	MHC class I-like antigen recognition-like superfamily	6	0.00306721	9.14903e-06	Over	P10321 P04439 P13747 Q9BZM5 P01889 Q9BZM4
IPR011161	interpro	MHC class I-like antigen recognition-like	6	0.00306721	9.14903e-06	Over	P10321 P04439 P13747 Q9BZM5 P01889 Q9BZM4
IPR010579	interpro	MHC class I, alpha chain, C-terminal	4	0.00386612	1.44151e-05	Over	P10321 P04439 P13747 P01889
IPR007110	interpro	Immunoglobulin-like domain	14	0.0054517	2.64509e-05	Over	O75326 P30530 P43121 Q13308 P15151 P10321 P04439 Q9Y624 P13747 P61769 Q08722 O95297 P01889 Q01973
IPR013783	interpro	Immunoglobulin-like fold	21	0.0054517	2.84578e-05	Over	O75326 P02751 P30530 P15509 P43121 P05362 Q13308 P15151 Q9Y2H6 P10321 P04439 Q9Y624 P13747 P61769 Q08722 O43278 O95297 P01889 P24821 Q01973 P29317
IPR000742	interpro	EGF-like domain	10	0.00835598	5.62484e-05	Over	Q07954 Q6UXH1 P00749 P07942 O75093 Q96HD1 Q13753 O00339 P15514 P24821
IPR007125	interpro	Histone H2A/H2B/H3	6	0.00835598	6.36937e-05	Over	Q99880 Q71DI3 Q6DN03 P68431 Q8IUE6 Q6FI13
IPR001039	interpro	MHC class I alpha chain, alpha1 alpha2 domains	4	0.00835598	6.85427e-05	Over	P10321 P04439 P13747 P01889
IPR005819	interpro	Histone H5	4	0.00835598	6.85427e-05	Over	P07305 Q92522 P10412 P16403
IPR011527	interpro	ABC transporter type 1, transmembrane domain	5	0.00931699	9.03213e-05	Over	P28288 P08183 Q03518 Q03519 O14678
IPR036640	interpro	ABC transporter type 1, transmembrane domain superfamily	5	0.00931699	9.03213e-05	Over	P28288 P08183 Q03518 Q03519 O14678
IPR013032	interpro	EGF-like, conserved site	9	0.0117937	0.000123125	Over	Q07954 Q6UXH1 P00749 Q13751 O75093 Q96HD1 O00339 P15514 P24821
IPR003597	interpro	Immunoglobulin C1-set	5	0.0153315	0.000171494	Over	P10321 P04439 P13747 P61769 P01889
IPR003006	interpro	Immunoglobulin/major histocompatibility complex, conserved site	4	0.0163912	0.00019557	Over	P04439 P13747 P61769 P01889
IPR009030	interpro	Growth factor receptor cysteine-rich domain superfamily	7	0.0195875	0.000248313	Over	Q07954 Q6UXH1 O75093 Q96HD1 O00339 P29317 P00533
IPR002049	interpro	Laminin EGF domain	5	0.0222386	0.000298505	Over	Q6UXH1 Q13751 P07942 Q96HD1 Q13753
cd07698	CDD	IgC_MHC_I_alpha3	4	0.0291033	0.000434054	Over	P10321 P04439 P13747 P01889
IPR005818	interpro	Linker histone H1/H5, domain H15	4	0.0291033	0.000434054	Over	P07305 Q92522 P10412 P16403
IPR009072	interpro	Histone-fold	7	0.0444881	0.000771901	Over	Q99880 P62805 Q71DI3 Q6DN03 P68431 Q8IUE6 Q6FI13
IPR000006	interpro	Metallothionein, vertebrate	3	0.0444881	0.000895734	Over	P02795 P04732 P80297
IPR017854	interpro	Metallothionein domain superfamily	3	0.0444881	0.000895734	Over	P02795 P04732 P80297
IPR003019	interpro	Metallothionein	3	0.0444881	0.000895734	Over	P02795 P04732 P80297
IPR018064	interpro	Metallothionein, vertebrate, metal binding site	3	0.0444881	0.000895734	Over	P02795 P04732 P80297
IPR023587	interpro	Metallothionein domain superfamily, vertebrate	3	0.0444881	0.000895734	Over	P02795 P04732 P80297
IPR006212	interpro	Furin-like repeat	3	0.0444881	0.000895734	Over	Q6UXH1 Q96HD1 P00533
IPR012677	interpro	Nucleotide-binding alpha-beta plait domain superfamily	1	0.0489009	0.00102105	Under	Q15434
IPR017871	interpro	ABC transporter, conserved site	5	0.0512154	0.00110757	Over	P28288 P08183 Q03518 Q03519 O14678
IPR003439	interpro	ABC transporter-like	5	0.0705298	0.00157785	Over	P28288 P08183 Q03518 Q03519 O14678
cd00055	CDD	EGF_Lam	4	0.0970151	0.00224271	Over	Q13751 P07942 Q13753 P24821
IPR000152	interpro	EGF-type aspartate/asparagine hydroxylation site	5	0.116241	0.00293345	Over	Q07954 Q6UXH1 O75093 Q96HD1 O00339
IPR000504	interpro	RNA recognition motif domain	1	0.116241	0.00321173	Under	Q15434
IPR010007	interpro	SPAN-X family	2	0.116241	0.00381403	Over	Q9NS25 Q9BXN6
IPR010530	interpro	NADH-ubiquinone reductase complex 1 MLRQ subunit	2	0.116241	0.00381403	Over	Q9C002 O00483
cd03223	CDD	ABCD_peroxisomal_ALDP	2	0.116241	0.00381403	Over	P28288 O14678
IPR014044	interpro	CAP domain	2	0.116241	0.00381403	Over	P48060 Q9H4G4
IPR018244	interpro	Allergen V5/Tpx-1-related, conserved site	2	0.116241	0.00381403	Over	P48060 Q9H4G4
IPR035940	interpro	CAP superfamily	2	0.116241	0.00381403	Over	P48060 Q9H4G4
IPR001283	interpro	Cysteine-rich secretory protein, allergen V5/Tpx-1-related	2	0.116241	0.00381403	Over	P48060 Q9H4G4
IPR013305	interpro	ABC transporter Tap-like	2	0.116241	0.00381403	Over	Q03518 Q03519
cd03248	CDD	ABCC_TAP	2	0.116241	0.00381403	Over	Q03518 Q03519
IPR009653	interpro	Protein kish	2	0.116241	0.00381403	Over	Q8TBQ9 Q9NRX6
IPR030697	interpro	Ras-related protein Rab29/Rab38/Rab32	2	0.116241	0.00381403	Over	Q13637 O14966
IPR004031	interpro	PMP-22/EMP/MP20/Claudin superfamily	3	0.121509	0.00407747	Over	Q9BXT2 O95832 P54852
IPR035979	interpro	RNA-binding domain superfamily	2	0.156436	0.00622936	Under	Q15434 Q9NR30
IPR036322	interpro	WD40-repeat-containing domain superfamily	3	0.156436	0.00674927	Under	Q15334 Q9GZL7 Q8NFP9
IPR011993	interpro	PH-like domain superfamily	4	0.156436	0.00734644	Under	Q6F5E8 Q9NVZ3 Q9ULH1 Q53GA4
IPR001881	interpro	EGF-like calcium-binding domain	5	0.156436	0.00786065	Over	Q07954 Q6UXH1 O75093 Q96HD1 O00339
IPR017986	interpro	WD40-repeat-containing domain	2	0.156436	0.00879275	Under	Q9GZL7 Q8NFP9
IPR003961	interpro	Fibronectin type III	6	0.156436	0.00898781	Over	P02751 P30530 P15509 Q9Y2H6 P24821 P29317
PR00011	PRINTS	Type III EGF-like signature	3	0.156436	0.0104006	Over	Q13751 P07942 Q13753
IPR036116	interpro	Fibronectin type III superfamily	6	0.156436	0.0105787	Over	P02751 P30530 P15509 Q9Y2H6 P24821 P29317
IPR003599	interpro	Immunoglobulin subtype	8	0.156436	0.0108227	Over	P30530 P43121 P05362 Q13308 P15151 Q9Y624 O95297 Q01973
IPR002181	interpro	Fibrinogen, alpha/beta/gamma chain, C-terminal globular domain	2	0.156436	0.0109726	Over	P02679 P24821
IPR036056	interpro	Fibrinogen-like, C-terminal	2	0.156436	0.0109726	Over	P02679 P24821
IPR000975	interpro	Interleukin-1 family	2	0.156436	0.0109726	Over	P01584 Q14116
IPR003645	interpro	Follistatin-like, N-terminal	2	0.156436	0.0109726	Over	O75093 Q12841
PF15711	Pfam	Interleukin-like EMT inducer	2	0.156436	0.0109726	Over	Q92520 Q9UHN6
IPR001563	interpro	Peptidase S10, serine carboxypeptidase	2	0.156436	0.0109726	Over	P10619 Q9H3G5
IPR018202	interpro	Serine carboxypeptidase, serine active site	2	0.156436	0.0109726	Over	P10619 Q9H3G5
IPR008251	interpro	Chromo shadow domain	2	0.156436	0.0109726	Over	P45973 Q13185
IPR012936	interpro	Endoplasmic reticulum vesicle transporter, C-terminal	2	0.156436	0.0109726	Over	Q9Y282 Q96RQ1
PF13850	Pfam	Endoplasmic Reticulum-Golgi Intermediate Compartment (ERGIC)	2	0.156436	0.0109726	Over	Q9Y282 Q96RQ1
PR00890	PRINTS	Smooth muscle protein 22-alpha (transgelin) signature	2	0.156436	0.0109726	Over	Q9UI15 Q01995
IPR000558	interpro	Histone H2B	2	0.156436	0.0109726	Over	Q99880 Q6DN03
IPR000164	interpro	Histone H3/CENP-A	2	0.156436	0.0109726	Over	Q71DI3 P68431
cd00054	CDD	EGF_CA	5	0.156436	0.0117399	Over	Q07954 O75093 Q96HD1 O00339 P24821
IPR015943	interpro	WD40/YVTN repeat-like-containing domain superfamily	4	0.156436	0.0135254	Under	O75326 Q99523 Q15334 Q9GZL7
IPR001680	interpro	WD40 repeat	3	0.156436	0.0137097	Under	Q15334 Q9GZL7 Q8NFP9
IPR018097	interpro	EGF-like calcium-binding, conserved site	4	0.156436	0.0144575	Over	Q07954 Q6UXH1 O75093 Q96HD1
IPR018503	interpro	Tetraspanin, conserved site	3	0.156436	0.0148937	Over	P27701 P21926 O43657
IPR037069	interpro	Acyl-CoA dehydrogenase/oxidase, N-terminal domain superfamily	3	0.156436	0.0148937	Over	Q15067 P49748 P16219
IPR001849	interpro	Pleckstrin homology domain	2	0.156436	0.0172319	Under	Q9ULH1 Q53GA4
IPR000301	interpro	Tetraspanin	3	0.156436	0.0203156	Over	P27701 P21926 O43657
IPR008952	interpro	Tetraspanin, EC2 domain superfamily	3	0.156436	0.0203156	Over	P27701 P21926 O43657
IPR018499	interpro	Tetraspanin/Peripherin	3	0.156436	0.0203156	Over	P27701 P21926 O43657
IPR013806	interpro	Kringle-like fold	3	0.156436	0.0203156	Over	P02751 P00749 Q01973
IPR005024	interpro	Snf7 family	3	0.156436	0.0203156	Over	Q9UQN3 O43633 Q9Y3E7
IPR006091	interpro	Acyl-CoA oxidase/dehydrogenase, central domain	3	0.156436	0.0203156	Over	Q15067 P49748 P16219
IPR036250	interpro	Acyl-CoA dehydrogenase-like, C-terminal	3	0.156436	0.0203156	Over	Q15067 P49748 P16219
IPR009100	interpro	Acyl-CoA dehydrogenase/oxidase, N-terminal and middle domain superfamily	3	0.156436	0.0203156	Over	Q15067 P49748 P16219
IPR002715	interpro	Nascent polypeptide-associated complex NAC domain	2	0.156436	0.0210495	Over	Q96K17 P20290
IPR038187	interpro	NAC A/B domain superfamily	2	0.156436	0.0210495	Over	Q96K17 P20290
IPR036938	interpro	Phosphatidic acid phosphatase type 2/haloperoxidase superfamily	2	0.156436	0.0210495	Over	O14495 Q86YN1
IPR000326	interpro	Phosphatidic acid phosphatase type 2/haloperoxidase	2	0.156436	0.0210495	Over	O14495 Q86YN1
IPR008996	interpro	Cytokine IL1/FGF	2	0.156436	0.0210495	Over	P01584 Q14116
IPR000834	interpro	Peptidase M14, carboxypeptidase A	2	0.156436	0.0210495	Over	O75976 Q9UI42
IPR025661	interpro	Cysteine peptidase, asparagine active site	2	0.156436	0.0210495	Over	P07858 Q9UBR2
PR00453	PRINTS	Von Willebrand factor type A domain signature	2	0.156436	0.0210495	Over	P17301 O00339
IPR029760	interpro	Glutathione peroxidase conserved site	2	0.156436	0.0210495	Over	Q8TED1 P07203
IPR000889	interpro	Glutathione peroxidase	2	0.156436	0.0210495	Over	Q8TED1 P07203
IPR017984	interpro	Chromo domain subgroup	2	0.156436	0.0210495	Over	P45973 Q13185
IPR039361	interpro	Cyclin	2	0.156436	0.0210495	Over	P20248 P14635
IPR028939	interpro	Pyrroline-5-carboxylate reductase, catalytic, N-terminal	2	0.156436	0.0210495	Over	Q96C36 Q658P3
IPR036578	interpro	SMAD MH1 domain superfamily	2	0.156436	0.0210495	Over	P84022 Q99717
IPR013790	interpro	Dwarfin	2	0.156436	0.0210495	Over	P84022 Q99717
IPR013019	interpro	MAD homology, MH1	2	0.156436	0.0210495	Over	P84022 Q99717
IPR001132	interpro	SMAD domain, Dwarfin-type	2	0.156436	0.0210495	Over	P84022 Q99717
IPR032458	interpro	Histone H2A conserved site	2	0.156436	0.0210495	Over	Q8IUE6 Q6FI13
IPR008266	interpro	Tyrosine-protein kinase, active site	5	0.156436	0.023002	Over	P30530 Q13308 Q01973 P29317 P00533
IPR001245	interpro	Serine-threonine/tyrosine-protein kinase, catalytic domain	6	0.156436	0.0244681	Over	P30530 Q13308 P04049 Q01973 P29317 P00533
cd00096	CDD	Ig	6	0.156436	0.0244681	Over	P30530 P43121 P05362 Q13308 Q9Y624 Q01973
IPR000668	interpro	Peptidase C1A, papain C-terminal	2	0.156436	0.0336581	Over	P07858 Q9UBR2
IPR013128	interpro	Peptidase C1A	2	0.156436	0.0336581	Over	P07858 Q9UBR2
IPR000557	interpro	Calponin repeat	2	0.156436	0.0336581	Over	Q9UI15 Q01995
cd02186	CDD	alpha_tubulin	2	0.156436	0.0336581	Over	Q71U36 A6NHL2
IPR002452	interpro	Alpha tubulin	2	0.156436	0.0336581	Over	Q71U36 A6NHL2
IPR008280	interpro	Tubulin/FtsZ, C-terminal	3	0.156436	0.0421897	Over	Q13885 Q71U36 A6NHL2
IPR023123	interpro	Tubulin, C-terminal	3	0.156436	0.0421897	Over	Q13885 Q71U36 A6NHL2
IPR018316	interpro	Tubulin/FtsZ, 2-layer sandwich domain	3	0.156436	0.0421897	Over	Q13885 Q71U36 A6NHL2
IPR000217	interpro	Tubulin	3	0.156436	0.0421897	Over	Q13885 Q71U36 A6NHL2
IPR017975	interpro	Tubulin, conserved site	3	0.156436	0.0421897	Over	Q13885 Q71U36 A6NHL2
IPR003008	interpro	Tubulin/FtsZ, GTPase domain	3	0.156436	0.0421897	Over	Q13885 Q71U36 A6NHL2
IPR037103	interpro	Tubulin/FtsZ, C-terminal domain superfamily	3	0.156436	0.0421897	Over	Q13885 Q71U36 A6NHL2
PF13620	Pfam	Carboxypeptidase regulatory-like domain	2	0.156436	0.0484484	Over	O75976 Q15155
PF14670	Pfam	Coagulation Factor Xa inhibitory site	2	0.156436	0.0484484	Over	Q07954 O00339
IPR026823	interpro	Complement Clr-like EGF domain	2	0.156436	0.0484484	Over	Q07954 O00339
IPR013519	interpro	Integrin alpha beta-propellor	2	0.156436	0.0484484	Over	P17301 P08648
IPR013517	interpro	FG-GAP repeat	2	0.156436	0.0484484	Over	P17301 P08648
IPR013649	interpro	Integrin alpha-2	2	0.156436	0.0484484	Over	P17301 P08648
IPR028994	interpro	Integrin alpha, N-terminal	2	0.156436	0.0484484	Over	P17301 P08648
IPR000413	interpro	Integrin alpha chain	2	0.156436	0.0484484	Over	P17301 P08648
IPR018184	interpro	Integrin alpha chain, C-terminal cytoplasmic region, conserved site	2	0.156436	0.0484484	Over	P17301 P08648
IPR000001	interpro	Kringle	2	0.156436	0.0484484	Over	P00749 Q01973
PR00018	PRINTS	Kringle domain signature	2	0.156436	0.0484484	Over	P00749 Q01973
IPR038178	interpro	Kringle superfamily	2	0.156436	0.0484484	Over	P00749 Q01973
IPR018056	interpro	Kringle, conserved site	2	0.156436	0.0484484	Over	P00749 Q01973
IPR038684	interpro	Laminin, N-terminal domain superfamily	2	0.156436	0.0484484	Over	Q13751 P07942
IPR008211	interpro	Laminin, N-terminal	2	0.156436	0.0484484	Over	Q13751 P07942
IPR017855	interpro	SMAD-like domain superfamily	2	0.156436	0.0484484	Over	P84022 Q99717
IPR003619	interpro	MAD homology 1, Dwarfin-type	2	0.156436	0.0484484	Over	P84022 Q99717
IPR002119	interpro	Histone H2A	2	0.156436	0.0484484	Over	Q8IUE6 Q6FI13
IPR032454	interpro	Histone H2A, C-terminal domain	2	0.156436	0.0484484	Over	Q8IUE6 Q6FI13
PF13927	Pfam	Immunoglobulin domain	4	0.156436	0.0500733	Over	P30530 P43121 Q13308 Q9Y624
IPR036525	interpro	Tubulin/FtsZ, GTPase domain superfamily	3	0.156436	0.0513036	Over	Q13885 Q71U36 A6NHL2
IPR011042	interpro	Six-bladed beta-propeller, TolB-like	3	0.156436	0.0513036	Over	Q07954 Q5JS37 Q15165
PS51808	ProSiteProfiles	Coiled coil-helix-coiled coil-helix (CHCH) domain profile.	3	0.156436	0.0612825	Over	Q14061 Q7Z7K0 Q5T1J5
cd14183	CDD	STKc_DCKL1	1	0.156436	0.061828	Over	O15075
IPR007593	interpro	CD225/Dispanin family	1	0.156436	0.061828	Over	Q01628
IPR008370	interpro	Voltage-dependent calcium channel, gamma-6 subunit	1	0.156436	0.061828	Over	Q9BXT2
IPR008368	interpro	Voltage-dependent calcium channel, gamma subunit	1	0.156436	0.061828	Over	Q9BXT2
cd11243	CDD	Sema_7A	1	0.156436	0.061828	Over	O75326
IPR003910	interpro	GPCR, family 2, orphan receptor, GPR1/GPR3/GPR5	1	0.156436	0.061828	Over	Q9Y653
IPR014715	interpro	Fibrinogen, alpha/beta/gamma chain, C-terminal globular, subdomain 2	1	0.156436	0.061828	Over	P02679
IPR014716	interpro	Fibrinogen, alpha/beta/gamma chain, C-terminal globular, subdomain 1	1	0.156436	0.061828	Over	P02679
IPR037581	interpro	Fibrinogen gamma chain	1	0.156436	0.061828	Over	P02679
cd06603	CDD	GH31_GANC_GANAB_alpha	1	0.156436	0.061828	Over	Q14697
IPR027321	interpro	Microtubule-associated protein 1B	1	0.156436	0.061828	Over	P46821
IPR000102	interpro	Neuraxin/MAP1B repeat	1	0.156436	0.061828	Over	P46821
IPR007745	interpro	Cytochrome c oxidase copper chaperone	1	0.156436	0.061828	Over	Q14061
cd03160	CDD	CD37_CD82_like_LEL	1	0.156436	0.061828	Over	P27701
cd03152	CDD	CD9_LEL	1	0.156436	0.061828	Over	P21926
IPR028675	interpro	Lipid phosphate phosphohydrolase 3	1	0.156436	0.061828	Over	O14495
IPR019831	interpro	Manganese/iron superoxide dismutase, N-terminal	1	0.156436	0.061828	Over	P04179
IPR019832	interpro	Manganese/iron superoxide dismutase, C-terminal	1	0.156436	0.061828	Over	P04179
IPR001189	interpro	Manganese/iron superoxide dismutase	1	0.156436	0.061828	Over	P04179
IPR036314	interpro	Manganese/iron superoxide dismutase, C-terminal domain superfamily	1	0.156436	0.061828	Over	P04179
IPR036324	interpro	Manganese/iron superoxide dismutase, N-terminal domain superfamily	1	0.156436	0.061828	Over	P04179
IPR019833	interpro	Manganese/iron superoxide dismutase, binding site	1	0.156436	0.061828	Over	P04179
IPR003548	interpro	Claudin-1	1	0.156436	0.061828	Over	O95832
cd05075	CDD	PTKc_Axl	1	0.156436	0.061828	Over	P30530
cd05749	CDD	Ig2_Axl_Tyro3_like	1	0.156436	0.061828	Over	P30530
cd16743	CDD	RING-HC_RNF5	1	0.156436	0.061828	Over	Q99942
IPR037192	interpro	ERO1-like superfamily	1	0.156436	0.061828	Over	Q96HE7
IPR007266	interpro	Endoplasmic reticulum oxidoreductin 1	1	0.156436	0.061828	Over	Q96HE7
IPR003296	interpro	Interleukin-1 beta	1	0.156436	0.061828	Over	P01584
PR01359	PRINTS	Interleukin-1 beta precursor signature	1	0.156436	0.061828	Over	P01584
IPR031653	interpro	MAPK-interacting and spindle-stabilising protein	1	0.156436	0.061828	Over	Q8NDC0
cd01679	CDD	RNR_I	1	0.156436	0.061828	Over	P23921
IPR005144	interpro	ATP-cone domain	1	0.156436	0.061828	Over	P23921
IPR000788	interpro	Ribonucleotide reductase large subunit, C-terminal	1	0.156436	0.061828	Over	P23921
IPR008926	interpro	Ribonucleotide reductase R1 subunit, N-terminal	1	0.156436	0.061828	Over	P23921
IPR013509	interpro	Ribonucleotide reductase large subunit, N-terminal	1	0.156436	0.061828	Over	P23921
IPR013346	interpro	Ribonucleotide reductase, class I , alpha subunit	1	0.156436	0.061828	Over	P23921
IPR007850	interpro	RCSD	1	0.156436	0.061828	Over	Q6JBY9
IPR029771	interpro	AMP deaminase 3	1	0.156436	0.061828	Over	Q01432
IPR005283	interpro	Peroxysomal long chain fatty acyl transporter	1	0.156436	0.061828	Over	P28288
IPR031241	interpro	ATP-binding cassette sub-family D member 3	1	0.156436	0.061828	Over	P28288
IPR015567	interpro	Peptidase M14B, caboxypeptidase D	1	0.156436	0.061828	Over	O75976
IPR034224	interpro	Carboxypeptidase D, carboxypeptidase-like domain 2	1	0.156436	0.061828	Over	O75976
IPR033848	interpro	Carboxypeptidase D, carboxypeptidase-like domain 3	1	0.156436	0.061828	Over	O75976
IPR034241	interpro	Carboxypeptidase D, carboxypeptidase-like domain 1	1	0.156436	0.061828	Over	O75976
IPR012599	interpro	Peptidase C1A, propeptide	1	0.156436	0.061828	Over	P07858
IPR013880	interpro	Yos1-like	1	0.156436	0.061828	Over	Q9Y5U9
IPR035518	interpro	Dolichyl-phosphate beta-glucosyltransferase	1	0.156436	0.061828	Over	Q9Y673
IPR032485	interpro	Domain of unknown function DUF5050	1	0.156436	0.061828	Over	Q07954
IPR019537	interpro	Transmembrane protein 65	1	0.156436	0.061828	Over	Q6PI78
IPR034961	interpro	Leupaxin	1	0.156436	0.061828	Over	O60711
cd09410	CDD	LIM3_Leupaxin	1	0.156436	0.061828	Over	O60711
cd09408	CDD	LIM2_Leupaxin	1	0.156436	0.061828	Over	O60711
cd09339	CDD	LIM4_Paxillin_like	1	0.156436	0.061828	Over	O60711
cd09406	CDD	LIM1_Leupaxin	1	0.156436	0.061828	Over	O60711
IPR036990	interpro	Metallocarboxypeptidase-like, propeptide	1	0.156436	0.061828	Over	Q9UI42
IPR003146	interpro	Carboxypeptidase, activation peptide	1	0.156436	0.061828	Over	Q9UI42
IPR034248	interpro	Carboxypeptidase A, carboxypeptidase domain	1	0.156436	0.061828	Over	Q9UI42
IPR015529	interpro	Interleukin-18	1	0.156436	0.061828	Over	Q14116
IPR033298	interpro	Caveolae-associated protein 2	1	0.156436	0.061828	Over	O95810
IPR029778	interpro	Centrosomal protein of 85kDa-like	1	0.156436	0.061828	Over	Q5SZL2
IPR002413	interpro	Ves allergen	1	0.156436	0.061828	Over	P48060
IPR034121	interpro	Glioma pathogenesis-related protein 1-like, SCP domain	1	0.156436	0.061828	Over	P48060
IPR028602	interpro	Protein argonaute-2	1	0.156436	0.061828	Over	Q9UKV8
IPR001299	interpro	Ependymin	1	0.156436	0.061828	Over	Q9UM22
IPR018224	interpro	Ependymin, conserved site	1	0.156436	0.061828	Over	Q9UM22
IPR026084	interpro	Trans-Golgi network integral membrane protein TGN38	1	0.156436	0.061828	Over	O43493
IPR003532	interpro	Short hematopoietin receptor, family 2, conserved site	1	0.156436	0.061828	Over	P15509
cd08325	CDD	CARD_CASP1-like	1	0.156436	0.061828	Over	P49662
IPR034814	interpro	Urokinase-type plasminogen activator	1	0.156436	0.061828	Over	P00749
IPR002499	interpro	Major vault protein, N-terminal	1	0.156436	0.061828	Over	Q14764
IPR021870	interpro	Major vault protein, shoulder domain	1	0.156436	0.061828	Over	Q14764
IPR039059	interpro	Major vault protein	1	0.156436	0.061828	Over	Q14764
IPR004978	interpro	Stanniocalcin	1	0.156436	0.061828	Over	P52823
cd10299	CDD	GST_C_CLIC3	1	0.156436	0.061828	Over	O95833
IPR030261	interpro	Chloride intracellular channel protein 3	1	0.156436	0.061828	Over	O95833
PD191299	ProDom	C6ORF47 G4 HOMOLOG POLYMORPHISM	1	0.156436	0.061828	Over	O95873
IPR029073	interpro	Protein of unknown function DUF4661	1	0.156436	0.061828	Over	O95873
IPR030258	interpro	Multidrug resistance protein 1	1	0.156436	0.061828	Over	P08183
IPR008605	interpro	Extracellular matrix protein 1	1	0.156436	0.061828	Over	Q16610
IPR038849	interpro	ADP-ribosylation factor-like protein 2-binding protein	1	0.156436	0.061828	Over	Q9Y2Y0
IPR028813	interpro	Nucleobindin-2	1	0.156436	0.061828	Over	P80303
IPR026138	interpro	Ceroid-lipofuscinosis neuronal protein 5	1	0.156436	0.061828	Over	O75503
IPR001286	interpro	Glycoside hydrolase, family 59	1	0.156436	0.061828	Over	P54803
IPR035394	interpro	Glycosyl hydrolase family 59, central domain	1	0.156436	0.061828	Over	P54803
cd01785	CDD	PDZ_GEF_RA	1	0.156436	0.061828	Over	Q9Y4G8
IPR030739	interpro	Rap guanine nucleotide exchange factor 2	1	0.156436	0.061828	Over	Q9Y4G8
IPR034304	interpro	Plasma membrane calcium-transporting ATPase 4	1	0.156436	0.061828	Over	P23634
IPR013618	interpro	Domain of unknown function DUF1736	1	0.156436	0.061828	Over	Q6ZXV5
IPR026143	interpro	Golgi membrane protein 1	1	0.156436	0.061828	Over	Q8NBJ4
cd16233	CDD	EFh_SPARC_FSTL1	1	0.156436	0.061828	Over	Q12841
IPR015369	interpro	Follistatin/Osteonectin EGF domain	1	0.156436	0.061828	Over	Q12841
IPR036773	interpro	TGF-beta binding (TB) domain superfamily	1	0.156436	0.061828	Over	Q12841
IPR007653	interpro	Signal peptidase complex subunit 3	1	0.156436	0.061828	Over	P61009
cd05760	CDD	Ig2_PTK7	1	0.156436	0.061828	Over	Q13308
cd05046	CDD	PTK_CCK4	1	0.156436	0.061828	Over	Q13308
IPR033592	interpro	Inactive tyrosine-protein kinase 7	1	0.156436	0.061828	Over	Q13308
IPR007648	interpro	Mitochondrial ATPase inhibitor	1	0.156436	0.061828	Over	Q9UII2
IPR003730	interpro	Multi-copper polyphenol oxidoreductase	1	0.156436	0.061828	Over	Q8IV20
IPR011324	interpro	Cytotoxic necrotizing factor-like, catalytic	1	0.156436	0.061828	Over	Q8IV20
IPR038371	interpro	Multi-copper polyphenol oxidoreductase superfamily	1	0.156436	0.061828	Over	Q8IV20
cd05718	CDD	Ig1_PVR_like	1	0.156436	0.061828	Over	P15151
cd07703	CDD	Ig2_Nectin-2_like	1	0.156436	0.061828	Over	P15151
IPR037354	interpro	COMM domain-containing protein 2	1	0.156436	0.061828	Over	Q86X83
cd12903	CDD	SPRY_PRY_SPRYD4	1	0.156436	0.061828	Over	Q8WW59
PR01896	PRINTS	ABC transporter family B2 signature	1	0.156436	0.061828	Over	Q03518
IPR013306	interpro	Antigen peptide transporter 1	1	0.156436	0.061828	Over	Q03518
cd09523	CDD	SAM_TAL	1	0.156436	0.061828	Over	Q6UWE0
cd16515	CDD	RING-HC_LRSAM1	1	0.156436	0.061828	Over	Q6UWE0
IPR034096	interpro	Mth938 domain-containing protein	1	0.156436	0.061828	Over	Q9H7C9
cd13940	CDD	ILEI_FAM3C	1	0.156436	0.061828	Over	Q92520
IPR039219	interpro	Protein FAM3C	1	0.156436	0.061828	Over	Q92520
IPR034750	interpro	CULT domain	1	0.156436	0.061828	Over	Q96SW2
IPR008334	interpro	5'-Nucleotidase, C-terminal	1	0.156436	0.061828	Over	P21589
IPR006146	interpro	5'-Nucleotidase, conserved site	1	0.156436	0.061828	Over	P21589
cd07409	CDD	MPP_CD73_N	1	0.156436	0.061828	Over	P21589
IPR006179	interpro	5'-Nucleotidase/apyrase	1	0.156436	0.061828	Over	P21589
IPR036907	interpro	5'-Nucleotidase, C-terminal domain superfamily	1	0.156436	0.061828	Over	P21589
IPR007794	interpro	Ribosome receptor lysine/proline rich	1	0.156436	0.061828	Over	Q9P2E9
IPR033157	interpro	Cathepsin X	1	0.156436	0.061828	Over	Q9UBR2
cd09476	CDD	LIM1_TLP	1	0.156436	0.061828	Over	P52943
IPR034450	interpro	Adipogenesis regulatory factor	1	0.156436	0.061828	Over	Q15847
IPR024581	interpro	Tbk1/Ikki binding domain	1	0.156436	0.061828	Over	Q92844
IPR027854	interpro	Short transmembrane mitochondrial protein 1	1	0.156436	0.061828	Over	L0R6Q1
cd14237	CDD	GAT_TM1L1	1	0.156436	0.061828	Over	O75674
IPR027428	interpro	TOM1-like protein 1	1	0.156436	0.061828	Over	O75674
IPR022065	interpro	Uncharacterised protein family, TMEM59	1	0.156436	0.061828	Over	Q9BXS4
IPR034113	interpro	Golgi-associated plant pathogenesis-related protein 1, SCP domain	1	0.156436	0.061828	Over	Q9H4G4
IPR011697	interpro	Peptidase C26	1	0.156436	0.061828	Over	Q92820
IPR015527	interpro	Peptidase C26, gamma-glutamyl hydrolase	1	0.156436	0.061828	Over	Q92820
cd01747	CDD	GATase1_Glutamyl_Hydrolase	1	0.156436	0.061828	Over	Q92820
IPR013376	interpro	Glutathione peroxidase Gpx7, putative	1	0.156436	0.061828	Over	Q8TED1
IPR039083	interpro	cAMP-dependent protein kinase catalytic subunit beta	1	0.156436	0.061828	Over	P22694
cd11298	CDD	O-FucT-2	1	0.156436	0.061828	Over	Q9Y2G5
IPR014644	interpro	Protein arginine N-methyltransferase PRMT7	1	0.156436	0.061828	Over	Q9NVM4
IPR035557	interpro	Sorting nexin-18, SH3 domain	1	0.156436	0.061828	Over	Q96RF0
IPR035703	interpro	SNX18, PX domain	1	0.156436	0.061828	Over	Q96RF0
cd09763	CDD	DHRS1-like_SDR_c	1	0.156436	0.061828	Over	Q96LJ7
IPR024121	interpro	Interferon-induced protein with tetratricopeptide repeats 1	1	0.156436	0.061828	Over	P09914
IPR033124	interpro	Serine carboxypeptidases, histidine active site	1	0.156436	0.061828	Over	P10619
IPR009542	interpro	Microsomal signal peptidase 12kDa subunit	1	0.156436	0.061828	Over	Q9Y6A9
IPR037713	interpro	Signal peptidase complex subunit Spc1	1	0.156436	0.061828	Over	Q9Y6A9
IPR026637	interpro	YIP1 family member 3	1	0.156436	0.061828	Over	Q9GZM5
IPR037435	interpro	14-3-3 protein sigma	1	0.156436	0.061828	Over	P31947
IPR030579	interpro	Gigaxonin	1	0.156436	0.061828	Over	Q9H2C0
IPR030646	interpro	Septin 8	1	0.156436	0.061828	Over	Q92599
IPR019392	interpro	Mitoguardin	1	0.156436	0.061828	Over	Q8NAN2
IPR002640	interpro	Arylesterase	1	0.156436	0.061828	Over	Q15165
IPR008364	interpro	Paraoxonase2	1	0.156436	0.061828	Over	Q15165
IPR019319	interpro	Protein of unknown function DUF2368	1	0.156436	0.061828	Over	Q9HBL7
IPR015707	interpro	Beta-2-Microglobulin	1	0.156436	0.061828	Over	P61769
cd05770	CDD	IgC_beta2m	1	0.156436	0.061828	Over	P61769
cd15726	CDD	FYVE_FYCO1	1	0.156436	0.061828	Over	Q9BQS8
IPR003912	interpro	Protease-activated receptor	1	0.156436	0.061828	Over	P55085
IPR002281	interpro	Protease-activated receptor 2	1	0.156436	0.061828	Over	P55085
cd15370	CDD	7tmA_PAR2	1	0.156436	0.061828	Over	P55085
IPR026308	interpro	Apoptosis regulator BAK	1	0.156436	0.061828	Over	Q16611
IPR000511	interpro	Cytochrome c/c1 haem-lyase	1	0.156436	0.061828	Over	P53701
IPR026776	interpro	Uncharacterised protein family UPF0729	1	0.156436	0.061828	Over	Q8TCD1
IPR008408	interpro	Brain acid soluble protein 1	1	0.156436	0.061828	Over	P80723
IPR008913	interpro	Zinc finger, CHY-type	1	0.156436	0.061828	Over	Q96PM5
IPR037275	interpro	Zinc finger, CTCHY-type superfamily	1	0.156436	0.061828	Over	Q96PM5
cd16464	CDD	RING-H2_Pirh2	1	0.156436	0.061828	Over	Q96PM5
PF14599	Pfam	Zinc-ribbon	1	0.156436	0.061828	Over	Q96PM5
IPR017921	interpro	Zinc finger, CTCHY-type	1	0.156436	0.061828	Over	Q96PM5
IPR037274	interpro	Zinc finger, CHY-type superfamily	1	0.156436	0.061828	Over	Q96PM5
IPR019316	interpro	G8 domain	1	0.156436	0.061828	Over	Q9UHN6
cd13938	CDD	PANDER_like_TMEM2	1	0.156436	0.061828	Over	Q9UHN6
IPR029320	interpro	Acyl-coenzyme A oxidase, N-terminal	1	0.156436	0.061828	Over	Q15067
IPR032108	interpro	CLIP1, zinc knuckle	1	0.156436	0.061828	Over	P30622
IPR037395	interpro	GSK3B-interacting protein	1	0.156436	0.061828	Over	Q9P0R6
IPR007967	interpro	GSKIP domain	1	0.156436	0.061828	Over	Q9P0R6
IPR023231	interpro	GSKIP domain superfamily	1	0.156436	0.061828	Over	Q9P0R6
IPR029973	interpro	Transgelin-3	1	0.156436	0.061828	Over	Q9UI15
cd05169	CDD	PIKKc_TOR	1	0.156436	0.061828	Over	P42345
IPR009076	interpro	FKBP12-rapamycin binding domain	1	0.156436	0.061828	Over	P42345
IPR024585	interpro	Domain of unknown function DUF3385, target of rapamycin protein	1	0.156436	0.061828	Over	P42345
IPR036738	interpro	FKBP12-rapamycin binding domain superfamily	1	0.156436	0.061828	Over	P42345
IPR026683	interpro	Serine/threonine-protein kinase TOR	1	0.156436	0.061828	Over	P42345
IPR013270	interpro	CD47 immunoglobulin-like	1	0.156436	0.061828	Over	Q08722
IPR037805	interpro	Leukocyte surface antigen CD47, IgV	1	0.156436	0.061828	Over	Q08722
IPR013147	interpro	CD47 transmembrane	1	0.156436	0.061828	Over	Q08722
IPR006704	interpro	Leukocyte surface antigen CD47	1	0.156436	0.061828	Over	Q08722
cd15883	CDD	SNARE_syntaxin4	1	0.156436	0.061828	Over	Q12846
IPR007249	interpro	Dopey, N-terminal	1	0.156436	0.061828	Over	Q9Y3R5
IPR005293	interpro	Antigen peptide transporter 2	1	0.156436	0.061828	Over	Q03519
cd14964	CDD	7tm_GPCRs	1	0.156436	0.061828	Over	Q9P2C4
cd12090	CDD	MDA5_ID	1	0.156436	0.061828	Over	O95786
IPR038557	interpro	RIG-I-like receptor, C-terminal domain superfamily	1	0.156436	0.061828	Over	O95786
IPR021673	interpro	RIG-I-like receptor, C-terminal regulatory domain	1	0.156436	0.061828	Over	O95786
cd08817	CDD	CARD_RIG-I_r2	1	0.156436	0.061828	Over	O95786
cd15805	CDD	RIG-I_C	1	0.156436	0.061828	Over	O95786
IPR011106	interpro	Seven cysteines, N-terminal	1	0.156436	0.061828	Over	O43278
cd08804	CDD	Death_ank2	1	0.156436	0.061828	Over	Q01484
IPR028487	interpro	Protein S100-A13	1	0.156436	0.061828	Over	Q99584
IPR037428	interpro	Bridging integrator 3, BAR domain	1	0.156436	0.061828	Over	Q9NQY0
IPR008010	interpro	Tapt1 family	1	0.156436	0.061828	Over	Q6NXT6
IPR004032	interpro	PMP-22/EMP/MP20	1	0.156436	0.061828	Over	P54852
IPR003934	interpro	Epithelial membrane protein EMP-3	1	0.156436	0.061828	Over	P54852
IPR007657	interpro	Glycosyltransferase 61	1	0.156436	0.061828	Over	Q5NDL2
IPR009582	interpro	Signal peptidase complex subunit 2	1	0.156436	0.061828	Over	Q15005
IPR000920	interpro	Myelin P0 protein-related	1	0.156436	0.061828	Over	O95297
IPR029870	interpro	Myelin protein zero-like protein 1	1	0.156436	0.061828	Over	O95297
cd05715	CDD	Ig_P0-like	1	0.156436	0.061828	Over	O95297
IPR019375	interpro	Ribosomal protein S28, mitochondrial	1	0.156436	0.061828	Over	Q9Y2Q9
IPR007866	interpro	TRIC channel	1	0.156436	0.061828	Over	Q9NVV0
IPR038596	interpro	Janus superfamily	1	0.156436	0.061828	Over	Q9NRX4
IPR028441	interpro	14kDa phosphohistidine phosphatase	1	0.156436	0.061828	Over	Q9NRX4
IPR007702	interpro	Janus	1	0.156436	0.061828	Over	Q9NRX4
cd03161	CDD	TM4SF2_6_like_LEL	1	0.156436	0.061828	Over	O43657
IPR031082	interpro	Laminin subunit gamma-2	1	0.156436	0.061828	Over	Q13753
IPR009115	interpro	Annexin A8	1	0.156436	0.061828	Over	Q5VT79
IPR019383	interpro	Golgin subfamily A member 7/ERF4	1	0.156436	0.061828	Over	Q7Z5G4
IPR030747	interpro	Matrilin-2	1	0.156436	0.061828	Over	O00339
IPR036337	interpro	Matrilin, coiled-coil domain superfamily	1	0.156436	0.061828	Over	O00339
cd01475	CDD	vWA_Matrilin	1	0.156436	0.061828	Over	O00339
IPR019466	interpro	Matrilin, coiled-coil trimerisation domain	1	0.156436	0.061828	Over	O00339
IPR033916	interpro	ML domain, Npc2 like	1	0.156436	0.061828	Over	P61916
IPR037351	interpro	COMM domain-containing protein 1	1	0.156436	0.061828	Over	Q8N668
IPR033776	interpro	COMMD1 N-terminal domain	1	0.156436	0.061828	Over	Q8N668
IPR005181	interpro	Sialate O-acetylesterase domain	1	0.156436	0.061828	Over	Q9HAT2
IPR039329	interpro	Sialate O-acetylesterase	1	0.156436	0.061828	Over	Q9HAT2
IPR029976	interpro	Transgelin	1	0.156436	0.061828	Over	Q01995
IPR015497	interpro	Epidermal growth factor receptor ligand	1	0.156436	0.061828	Over	P15514
IPR037301	interpro	Toll-interacting protein, C2 domain	1	0.156436	0.061828	Over	Q9H0E2
cd14363	CDD	CUE_TOLIP	1	0.156436	0.061828	Over	Q9H0E2
IPR037667	interpro	Protein FMC1 homologue	1	0.156436	0.061828	Over	Q96HJ9
IPR029557	interpro	Serine incorporator 3	1	0.156436	0.061828	Over	Q13530
IPR036348	interpro	WIBG, N-terminal domain superfamily	1	0.156436	0.061828	Over	Q9BRP8
IPR015362	interpro	WIBG, Mago-binding	1	0.156436	0.061828	Over	Q9BRP8
IPR039333	interpro	Partner of Y14 and mago	1	0.156436	0.061828	Over	Q9BRP8
IPR019389	interpro	Selenoprotein T	1	0.156436	0.061828	Over	P62341
IPR002500	interpro	Phosphoadenosine phosphosulphate reductase	1	0.156436	0.061828	Over	Q8NFF5
IPR012183	interpro	FAD synthetase with the MoaB/Mog domain	1	0.156436	0.061828	Over	Q8NFF5
IPR039138	interpro	Ubiquitin thioesterase OTU1	1	0.156436	0.061828	Over	Q5VVQ6
IPR027101	interpro	CD59 glycoprotein	1	0.156436	0.061828	Over	P13987
IPR035705	interpro	Proteasome subunit beta type 8	1	0.156436	0.061828	Over	P28062
IPR009684	interpro	Proteinase inhibitor I47, latexin	1	0.156436	0.061828	Over	Q9BS40
IPR029763	interpro	F-actin-uncapping protein RLTPR	1	0.156436	0.061828	Over	Q6F5E8
IPR030299	interpro	Ubiquitin thioesterase OTUB2	1	0.156436	0.061828	Over	Q96DC9
IPR022278	interpro	Phosphoserine aminotransferase	1	0.156436	0.061828	Over	Q9Y617
IPR020818	interpro	GroES chaperonin family	1	0.156436	0.061828	Over	P61604
IPR037124	interpro	GroES chaperonin superfamily	1	0.156436	0.061828	Over	P61604
IPR018369	interpro	Chaperonin GroES, conserved site	1	0.156436	0.061828	Over	P61604
cd14149	CDD	STKc_C-Raf	1	0.156436	0.061828	Over	P04049
IPR035776	interpro	CD2-associated protein, second SH3 domain	1	0.156436	0.061828	Over	Q9Y5K6
IPR028445	interpro	CD2-associated protein	1	0.156436	0.061828	Over	Q9Y5K6
IPR035775	interpro	CD2-associated protein, first SH3 domain	1	0.156436	0.061828	Over	Q9Y5K6
IPR035777	interpro	CD2-associated protein, third SH3 domain	1	0.156436	0.061828	Over	Q9Y5K6
cd03285	CDD	ABC_MSH2_euk	1	0.156436	0.061828	Over	P43246
IPR011184	interpro	DNA mismatch repair Msh2-type	1	0.156436	0.061828	Over	P43246
IPR032642	interpro	DNA mismatch repair protein Msh2	1	0.156436	0.061828	Over	P43246
IPR000541	interpro	Cytoplasmic tRNA 2-thiolation protein 1	1	0.156436	0.061828	Over	Q7Z7A3
IPR011063	interpro	tRNA(Ile)-lysidine/2-thiocytidine synthase, N-terminal	1	0.156436	0.061828	Over	Q7Z7A3
IPR032442	interpro	Cytoplasmic tRNA 2-thiolation protein 1, C-terminal	1	0.156436	0.061828	Over	Q7Z7A3
cd01993	CDD	Alpha_ANH_like_II	1	0.156436	0.061828	Over	Q7Z7A3
IPR035107	interpro	tRNA thiolation protein, TtcA/Ctu1 type	1	0.156436	0.061828	Over	Q7Z7A3
IPR017144	interpro	Peptidase M20A, amidohydrolase, predicted	1	0.156436	0.061828	Over	Q8IYS1
IPR032447	interpro	Cyclin-A, N-terminal	1	0.156436	0.061828	Over	P20248
IPR033367	interpro	BRI3-binding protein	1	0.156436	0.061828	Over	Q8WY22
IPR007238	interpro	DNA primase large subunit, eukaryotic/archaeal	1	0.156436	0.061828	Over	P49643
IPR016558	interpro	DNA primase, large subunit, eukaryotic	1	0.156436	0.061828	Over	P49643
cd01376	CDD	KISc_KID_like	1	0.156436	0.061828	Over	Q14807
IPR026986	interpro	Kinesin-like protein KIF22 (Kid)	1	0.156436	0.061828	Over	Q14807
IPR013865	interpro	Protein of unknown function DUF1754, eukaryotic	1	0.156436	0.061828	Over	Q9Y421
IPR029704	interpro	UPF0428 family	1	0.156436	0.061828	Over	Q9H5V9
cd14122	CDD	STKc_VRK1	1	0.156436	0.061828	Over	Q99986
IPR036458	interpro	Sodium:dicarboxylate symporter superfamily	1	0.156436	0.061828	Over	Q15758
IPR018107	interpro	Sodium:dicarboxylate symporter, conserved site	1	0.156436	0.061828	Over	Q15758
PR00173	PRINTS	Glutamate-aspartate symporter signature	1	0.156436	0.061828	Over	Q15758
IPR001991	interpro	Sodium:dicarboxylate symporter	1	0.156436	0.061828	Over	Q15758
cd06617	CDD	PKc_MKK3_6	1	0.156436	0.061828	Over	P46734
IPR018816	interpro	Cactin, central domain	1	0.156436	0.061828	Over	Q8WUQ7
IPR019134	interpro	Cactin, C-terminal	1	0.156436	0.061828	Over	Q8WUQ7
IPR038016	interpro	ASAP1, SH3 domain	1	0.156436	0.061828	Over	Q9ULH1
IPR037928	interpro	ASAP1, BAR domain	1	0.156436	0.061828	Over	Q9ULH1
IPR027197	interpro	Solute carrier family 43 member 3	1	0.156436	0.061828	Over	Q8NBI5
IPR017198	interpro	DNA (cytosine-5)-methyltransferase 1-like	1	0.156436	0.061828	Over	P26358
IPR018117	interpro	DNA methylase, C-5 cytosine-specific, active site	1	0.156436	0.061828	Over	P26358
cd04711	CDD	BAH_Dnmt1_II	1	0.156436	0.061828	Over	P26358
cd04760	CDD	BAH_Dnmt1_I	1	0.156436	0.061828	Over	P26358
IPR022702	interpro	DNA (cytosine-5)-methyltransferase 1, replication foci domain	1	0.156436	0.061828	Over	P26358
IPR038033	interpro	Chromobox protein homologue 3	1	0.156436	0.061828	Over	Q13185
IPR032698	interpro	Protein SirB1, N-terminal	1	0.156436	0.061828	Over	O94952
cd10238	CDD	HSPA14-like_NBD	1	0.156436	0.061828	Over	Q0VDF9
cd14214	CDD	PKc_CLK3	1	0.156436	0.061828	Over	P49761
IPR013498	interpro	DNA topoisomerase, type IA, zn finger	1	0.156436	0.061828	Over	Q13472
IPR033078	interpro	Tenascin-C	1	0.156436	0.061828	Over	P24821
IPR028599	interpro	WD repeat WDR12/Ytm1	1	0.156436	0.061828	Over	Q9GZL7
IPR023058	interpro	Peptidyl-prolyl cis-trans isomerase, PpiC-type, conserved site	1	0.156436	0.061828	Over	Q13526
IPR014033	interpro	Arginase	1	0.156436	0.061828	Over	P78540
cd09989	CDD	Arginase	1	0.156436	0.061828	Over	P78540
IPR016247	interpro	Tyrosine-protein kinase, receptor ROR	1	0.156436	0.061828	Over	Q01973
cd07467	CDD	CRD_TK_ROR1	1	0.156436	0.061828	Over	Q01973
cd05090	CDD	PTKc_Ror1	1	0.156436	0.061828	Over	Q01973
IPR012459	interpro	Ribosomal RNA-processing protein 15	1	0.156436	0.061828	Over	Q9Y3B9
IPR031077	interpro	High mobility group protein HMGB3	1	0.156436	0.061828	Over	O15347
cd11501	CDD	SLC6sbd_ATB0	1	0.156436	0.061828	Over	Q9UN76
PF05348	Pfam	Proteasome maturation factor UMP1	1	0.156436	0.061828	Over	Q9Y244
IPR008012	interpro	Proteasome maturation factor Ump1	1	0.156436	0.061828	Over	Q9Y244
IPR011430	interpro	Down-regulated-in-metastasis protein	1	0.156436	0.061828	Over	O75691
IPR018972	interpro	Sas10 C-terminal domain	1	0.156436	0.061828	Over	Q9NQZ2
cd10497	CDD	MH2_SMAD_1_5_9	1	0.156436	0.061828	Over	Q99717
cd10490	CDD	MH1_SMAD_1_5_9	1	0.156436	0.061828	Over	Q99717
IPR012959	interpro	CPL domain	1	0.156436	0.061828	Over	Q15397
IPR030045	interpro	Alpha-catulin 1	1	0.156436	0.061828	Over	Q9UBT7
cd02164	CDD	PPAT_CoAS	1	0.156436	0.061828	Over	Q13057
IPR014813	interpro	Guanine nucleotide-binding protein-like 3, N-terminal domain	1	0.156436	0.061828	Over	Q9BVP2
cd05831	CDD	Ribosomal_P1	1	0.156436	0.061828	Over	P05386
IPR015612	interpro	Metalloproteinase inhibitor 3	1	0.156436	0.061828	Over	P35625
IPR034263	interpro	Ephrin type-A receptor 2, ligand binding domain	1	0.156436	0.061828	Over	P29317
cd09543	CDD	SAM_EPH-A2	1	0.156436	0.061828	Over	P29317
cd05063	CDD	PTKc_EphR_A2	1	0.156436	0.061828	Over	P29317
cd03382	CDD	PAP2_dolichyldiphosphatase	1	0.156436	0.061828	Over	Q86YN1
IPR001503	interpro	Glycosyl transferase family 10	1	0.156436	0.061828	Over	Q11128
IPR038577	interpro	GT10-like superfamily	1	0.156436	0.061828	Over	Q11128
IPR031481	interpro	Fucosyltransferase, N-terminal	1	0.156436	0.061828	Over	Q11128
IPR032003	interpro	Ribosome-associated complex head domain	1	0.156436	0.061828	Over	Q99543
IPR033774	interpro	Yaf2/RYBP C-terminal binding motif	1	0.156436	0.061828	Over	Q8N488
IPR036157	interpro	dUTPase-like superfamily	1	0.156436	0.061828	Over	P33316
IPR029054	interpro	dUTPase-like	1	0.156436	0.061828	Over	P33316
IPR033704	interpro	dUTPase, trimeric	1	0.156436	0.061828	Over	P33316
IPR008181	interpro	Deoxyuridine triphosphate nucleotidohydrolase	1	0.156436	0.061828	Over	P33316
IPR028363	interpro	DNA-directed RNA polymerase, subunit RPB6	1	0.156436	0.061828	Over	P61218
IPR020708	interpro	DNA-directed RNA polymerase, 14-18kDa subunit, conserved site	1	0.156436	0.061828	Over	P61218
IPR006110	interpro	RNA polymerase, subunit omega/K/RPB6	1	0.156436	0.061828	Over	P61218
IPR036161	interpro	RPB6/omega subunit-like superfamily	1	0.156436	0.061828	Over	P61218
IPR012293	interpro	RNA polymerase subunit, RPB6/omega	1	0.156436	0.061828	Over	P61218
IPR006111	interpro	Archaeal RpoK/eukaryotic RPB6 RNA polymerase subunit	1	0.156436	0.061828	Over	P61218
IPR017407	interpro	Serine/threonine-protein kinase Rio1	1	0.156436	0.061828	Over	Q9BRS2
cd05147	CDD	RIO1_euk	1	0.156436	0.061828	Over	Q9BRS2
IPR034104	interpro	Sm-like protein Lsm1	1	0.156436	0.061828	Over	O15116
IPR028574	interpro	Transcription factor MafK	1	0.156436	0.061828	Over	O60675
IPR000959	interpro	POLO box domain	1	0.156436	0.061828	Over	P53350
IPR033702	interpro	Polo-like kinase 1, catalytic domain	1	0.156436	0.061828	Over	P53350
IPR036947	interpro	POLO box domain superfamily	1	0.156436	0.061828	Over	P53350
IPR033695	interpro	Second polo-box domain	1	0.156436	0.061828	Over	P53350
IPR033701	interpro	First polo-box domain	1	0.156436	0.061828	Over	P53350
IPR026939	interpro	At2g23090-like	1	0.156436	0.061828	Over	Q9Y5V0
IPR001951	interpro	Histone H4	1	0.156436	0.061828	Over	P62805
IPR019809	interpro	Histone H4, conserved site	1	0.156436	0.061828	Over	P62805
IPR035425	interpro	CENP-T/Histone H4, histone fold	1	0.156436	0.061828	Over	P62805
IPR038254	interpro	KIN17, WH-like domain superfamily	1	0.156436	0.061828	Over	O60870
IPR019447	interpro	DNA/RNA-binding protein Kin17, conserved domain	1	0.156436	0.061828	Over	O60870
IPR037321	interpro	KIN17-like protein	1	0.156436	0.061828	Over	O60870
cd13155	CDD	KOW_KIN17	1	0.156436	0.061828	Over	O60870
IPR008610	interpro	Eukaryotic rRNA processing	1	0.156436	0.061828	Over	Q99848
IPR031530	interpro	UPF0688 family	1	0.156436	0.061828	Over	Q8IYL3
IPR027496	interpro	1,2-dihydroxy-3-keto-5-methylthiopentene dioxygenase, eukaryotes	1	0.156436	0.061828	Over	Q9BV57
IPR004313	interpro	Acireductone dioxygenase ARD family	1	0.156436	0.061828	Over	Q9BV57
cd01812	CDD	BAG1_N	1	0.156436	0.061828	Over	Q99933
IPR017093	interpro	Molecular chaperone regulator BAG-1	1	0.156436	0.061828	Over	Q99933
IPR033378	interpro	Protein BRICK1	1	0.156436	0.061828	Over	Q8WUW1
cd05343	CDD	Mgc4172-like_SDR_c	1	0.156436	0.061828	Over	Q6UWP2
cd14213	CDD	PKc_CLK1_4	1	0.156436	0.061828	Over	P49759
IPR010971	interpro	Ubiquinone biosynthesis hydroxylase UbiH/COQ6	1	0.156436	0.061828	Over	Q9Y2Z9
IPR018168	interpro	Ubiquinone biosynthesis hydroxylase, UbiH/UbiF/VisC/COQ6, conserved site	1	0.156436	0.061828	Over	Q9Y2Z9
IPR000689	interpro	Ubiquinone biosynthesis monooxygenase COQ6	1	0.156436	0.061828	Over	Q9Y2Z9
IPR007015	interpro	DNA polymerase V	1	0.156436	0.061828	Over	Q9BQG0
IPR029815	interpro	Fos-related antigen 1	1	0.156436	0.061828	Over	P15407
cd05528	CDD	Bromo_AAA	1	0.156436	0.061828	Over	Q6PL18
IPR031252	interpro	ATPase family AAA domain-containing protein 2	1	0.156436	0.061828	Over	Q6PL18
IPR027330	interpro	TPX2 central domain	1	0.156436	0.061828	Over	Q9ULW0
IPR027329	interpro	TPX2, C-terminal	1	0.156436	0.061828	Over	Q9ULW0
IPR009675	interpro	TPX2	1	0.156436	0.061828	Over	Q9ULW0
IPR015128	interpro	Aurora-A binding	1	0.156436	0.061828	Over	Q9ULW0
IPR006211	interpro	Furin-like cysteine-rich domain	1	0.156436	0.061828	Over	P00533
IPR016245	interpro	Tyrosine protein kinase, EGF/ERB/XmrK receptor	1	0.156436	0.061828	Over	P00533
cd05108	CDD	PTKc_EGFR	1	0.156436	0.061828	Over	P00533
IPR000494	interpro	Receptor L-domain	1	0.156436	0.061828	Over	P00533
cd12093	CDD	TM_ErbB1	1	0.156436	0.061828	Over	P00533
IPR036941	interpro	Receptor L-domain superfamily	1	0.156436	0.061828	Over	P00533
IPR032778	interpro	Growth factor receptor domain 4	1	0.156436	0.061828	Over	P00533
cd15616	CDD	PHD_UHRF1	1	0.156436	0.061828	Over	Q96T88
IPR027326	interpro	Kinesin-like protein KIF20A	1	0.156436	0.061828	Over	O95235
IPR018605	interpro	Sororin protein	1	0.156436	0.061828	Over	Q96FF9
IPR038927	interpro	Uncharacterized protein C6orf163	1	0.156436	0.061828	Over	Q5TEZ5
IPR034649	interpro	Hsp70-interacting protein, N-terminal	1	0.156436	0.061828	Over	P50502
IPR037503	interpro	rRNA-processing protein Fcf1, PIN domain	1	0.156436	0.061828	Over	Q9Y324
IPR033087	interpro	RNA-binding protein Nova-2	1	0.156436	0.061828	Over	Q9UNW9
cd16211	CDD	EFh_PI-PLCbeta4	1	0.156436	0.061828	Over	Q15147
IPR000398	interpro	Thymidylate synthase	1	0.156436	0.061828	Over	P04818
IPR023451	interpro	Thymidylate synthase/dCMP hydroxymethylase domain	1	0.156436	0.061828	Over	P04818
IPR020940	interpro	Thymidylate synthase, active site	1	0.156436	0.061828	Over	P04818
IPR036926	interpro	Thymidylate synthase/dCMP hydroxymethylase superfamily	1	0.156436	0.061828	Over	P04818
cd07672	CDD	F-BAR_PSTPIP2	1	0.156436	0.061828	Over	Q9H939
IPR030106	interpro	Proline-serine-threonine phosphatase-interacting protein 2	1	0.156436	0.061828	Over	Q9H939
IPR026756	interpro	Nucleolar and spindle-associated protein 1	1	0.156436	0.061828	Over	Q9BXS6
IPR018613	interpro	Protein of unknown function DUF2052, coiled-coil	1	0.156436	0.061828	Over	Q96F63
IPR015876	interpro	Acyl-CoA desaturase	1	0.156436	0.061828	Over	O00767
IPR001522	interpro	Fatty acid desaturase type 1, conserved site	1	0.156436	0.061828	Over	O00767
IPR019188	interpro	Small nuclear RNA activating complex (SNAPc), subunit SNAP43	1	0.156436	0.061828	Over	Q16533
IPR008969	interpro	Carboxypeptidase-like, regulatory domain superfamily	2	0.163491	0.0651038	Over	O75976 Q15155
IPR017096	interpro	BTB-kelch protein	2	0.163491	0.0651038	Over	Q9H2C0 Q8NAB2
IPR003096	interpro	Smooth muscle protein/calponin	2	0.163491	0.0651038	Over	Q9UI15 Q01995
IPR004367	interpro	Cyclin, C-terminal domain	2	0.163491	0.0651038	Over	P20248 P14635
IPR019775	interpro	WD40 repeat, conserved site	2	0.165844	0.0661644	Under	Q15334 Q9GZL7
IPR013106	interpro	Immunoglobulin V-set domain	4	0.182843	0.0732189	Over	P43121 P15151 Q9Y624 O95297
IPR002347	interpro	Short-chain dehydrogenase/reductase SDR	4	0.182843	0.0732189	Over	Q9Y394 Q96LJ7 Q16698 Q6UWP2
IPR008253	interpro	Marvel domain	2	0.205435	0.0833382	Over	Q96S97 Q9UBR5
IPR001173	interpro	Glycosyltransferase 2-like	2	0.205435	0.0833382	Over	Q9Y673 Q6P9A2
IPR013162	interpro	CD80-like, immunoglobulin C2-set	2	0.205435	0.0833382	Over	P43121 P15151
cd14735	CDD	BACK_Kelch	2	0.205435	0.0833382	Over	Q9H2C0 Q8NAB2
IPR006089	interpro	Acyl-CoA dehydrogenase, conserved site	2	0.205435	0.0833382	Over	P49748 P16219
IPR009075	interpro	Acyl-CoA dehydrogenase/oxidase C-terminal	2	0.205435	0.0833382	Over	P49748 P16219
IPR013786	interpro	Acyl-CoA dehydrogenase/oxidase, N-terminal	2	0.205435	0.0833382	Over	P49748 P16219
IPR036047	interpro	F-box-like domain superfamily	3	0.205894	0.0836779	Over	Q9UK22 Q96CD0 O94952
IPR036055	interpro	LDL receptor-like superfamily	2	0.208441	0.102894	Over	Q07954 O43278
IPR032695	interpro	Integrin domain superfamily	2	0.208441	0.102894	Over	P17301 P08648
IPR018114	interpro	Serine proteases, trypsin family, histidine active site	2	0.208441	0.102894	Over	P00749 P07477
IPR033116	interpro	Serine proteases, trypsin family, serine active site	2	0.208441	0.102894	Over	P00749 P07477
IPR017920	interpro	COMM domain	2	0.208441	0.102894	Over	Q86X83 Q8N668
IPR003323	interpro	OTU domain	2	0.208441	0.102894	Over	Q5VVQ6 Q96DC9
IPR020635	interpro	Tyrosine-protein kinase, catalytic domain	3	0.208441	0.109019	Over	P30530 P29317 P00533
IPR000637	interpro	HMG-I/HMG-Y, DNA-binding, conserved site	1	0.208441	0.119842	Over	P52926
IPR000116	interpro	High mobility group protein HMGA	1	0.208441	0.119842	Over	P52926
cd02051	CDD	PAI-1_nexin-1	1	0.208441	0.119842	Over	P05121
IPR003533	interpro	Doublecortin domain	1	0.208441	0.119842	Over	O15075
IPR000406	interpro	Rho protein GDP-dissociation inhibitor	1	0.208441	0.119842	Over	P52566
IPR024792	interpro	Rho GDP-dissociation inhibitor domain superfamily	1	0.208441	0.119842	Over	P52566
IPR027231	interpro	Semaphorin	1	0.208441	0.119842	Over	O75326
IPR000832	interpro	GPCR, family 2, secretin-like	1	0.208441	0.119842	Over	Q9Y653
IPR012290	interpro	Fibrinogen, alpha/beta/gamma chain, coiled coil domain	1	0.208441	0.119842	Over	P02679
IPR020837	interpro	Fibrinogen, conserved site	1	0.208441	0.119842	Over	P02679
IPR025887	interpro	Glycoside hydrolase family 31, N-terminal domain	1	0.208441	0.119842	Over	Q14697
cd14752	CDD	GH31_N	1	0.208441	0.119842	Over	Q14697
IPR030459	interpro	Glycosyl hydrolases family 31, conserved site	1	0.208441	0.119842	Over	Q14697
IPR000322	interpro	Glycoside hydrolase family 31	1	0.208441	0.119842	Over	Q14697
IPR030458	interpro	Glycosyl hydrolases family 31, active site	1	0.208441	0.119842	Over	Q14697
IPR026074	interpro	Microtubule associated protein 1	1	0.208441	0.119842	Over	P46821
IPR000083	interpro	Fibronectin, type I	1	0.208441	0.119842	Over	P02751
cd03384	CDD	PAP2_wunen	1	0.208441	0.119842	Over	O14495
IPR004254	interpro	AdipoR/Haemolysin-III-related	1	0.208441	0.119842	Over	Q9NXK6
cd04139	CDD	RalA_RalB	1	0.208441	0.119842	Over	P11234
IPR028412	interpro	Ras-related protein Ral	1	0.208441	0.119842	Over	P11234
IPR020877	interpro	Interleukin-1 conserved site	1	0.208441	0.119842	Over	P01584
IPR003502	interpro	Interleukin-1 propeptide	1	0.208441	0.119842	Over	P01584
cd00100	CDD	IL1	1	0.208441	0.119842	Over	P01584
PR00262	PRINTS	IL1/HBGF family signature	1	0.208441	0.119842	Over	P01584
PR01357	PRINTS	Interleukin-1 alpha/beta precursor family signature	1	0.208441	0.119842	Over	P01584
IPR006329	interpro	AMP deaminase	1	0.208441	0.119842	Over	Q01432
cd11308	CDD	Peptidase_M14NE-CP-C_like	1	0.208441	0.119842	Over	O75976
cd02620	CDD	Peptidase_C1A_CathepsinB	1	0.208441	0.119842	Over	P07858
cd05799	CDD	PGM2	1	0.208441	0.119842	Over	Q6PCE3
cd01469	CDD	vWA_integrins_alpha_subunit	1	0.208441	0.119842	Over	P17301
IPR001152	interpro	Beta-thymosin	1	0.208441	0.119842	Over	P63313
IPR038386	interpro	Beta-thymosin superfamily	1	0.208441	0.119842	Over	P63313
IPR015321	interpro	Type I cytokine receptor, cytokine-binding domain	1	0.208441	0.119842	Over	P15509
IPR008775	interpro	Phytanoyl-CoA dioxygenase	1	0.208441	0.119842	Over	O14832
IPR000885	interpro	Fibrillar collagen, C-terminal	1	0.208441	0.119842	Over	P20908
IPR013892	interpro	Cytochrome c oxidase biogenesis protein Cmc1-like	1	0.208441	0.119842	Over	Q7Z7K0
IPR007014	interpro	FUN14	1	0.208441	0.119842	Over	Q9BWH2
IPR003987	interpro	Intercellular adhesion molecule/vascular cell adhesion molecule, N-terminal	1	0.208441	0.119842	Over	P05362
cd05755	CDD	Ig2_ICAM-1_like	1	0.208441	0.119842	Over	P05362
IPR013768	interpro	Intercellular adhesion molecule, N-terminal	1	0.208441	0.119842	Over	P05362
IPR003988	interpro	Intercellular adhesion molecule	1	0.208441	0.119842	Over	P05362
cd03249	CDD	ABC_MTABC3_MDL1_MDL2	1	0.208441	0.119842	Over	P08183
IPR009764	interpro	Ovarian carcinoma immunoreactive antigen	1	0.208441	0.119842	Over	Q9NX40
IPR013015	interpro	Laminin IV type B	1	0.208441	0.119842	Over	P07942
IPR023379	interpro	BART domain	1	0.208441	0.119842	Over	Q9Y2Y0
cd12474	CDD	RRM2_MSSP2	1	0.208441	0.119842	Over	Q15434
IPR020811	interpro	Enolase, N-terminal	1	0.208441	0.119842	Over	P09104
IPR020810	interpro	Enolase, C-terminal TIM barrel domain	1	0.208441	0.119842	Over	P09104
IPR020809	interpro	Enolase, conserved site	1	0.208441	0.119842	Over	P09104
IPR000941	interpro	Enolase	1	0.208441	0.119842	Over	P09104
SFLDF00002	SFLD	enolase	1	0.208441	0.119842	Over	P09104
IPR034390	interpro	Enolase-like superfamily	1	0.208441	0.119842	Over	P09104
cd02081	CDD	P-type_ATPase_Ca_PMCA-like	1	0.208441	0.119842	Over	P23634
IPR006408	interpro	P-type ATPase, subfamily IIB	1	0.208441	0.119842	Over	P23634
IPR022141	interpro	Plasma membrane calcium transporting P-type ATPase, C-terminal	1	0.208441	0.119842	Over	P23634
IPR026139	interpro	GOLM1/CASC4 family	1	0.208441	0.119842	Over	Q8NBJ4
IPR006757	interpro	Opioid growth factor receptor (OGFr) conserved domain	1	0.208441	0.119842	Over	Q5TC84
IPR036748	interpro	MTH938-like superfamily	1	0.208441	0.119842	Over	Q9H7C9
IPR007523	interpro	NDUFAF3/Mth938 domain-containing protein	1	0.208441	0.119842	Over	Q9H7C9
IPR039220	interpro	FAM3 family	1	0.208441	0.119842	Over	Q92520
cd08320	CDD	Pyrin_NALPs	1	0.208441	0.119842	Over	Q86W25
IPR035925	interpro	BSD domain superfamily	1	0.208441	0.119842	Over	Q9NW68
IPR011128	interpro	Glycerol-3-phosphate dehydrogenase, NAD-dependent, N-terminal	1	0.208441	0.119842	Over	P21695
IPR006168	interpro	Glycerol-3-phosphate dehydrogenase, NAD-dependent	1	0.208441	0.119842	Over	P21695
IPR017751	interpro	Glycerol-3-phosphate dehydrogenase, NAD-dependent, eukaryotic	1	0.208441	0.119842	Over	P21695
IPR006109	interpro	Glycerol-3-phosphate dehydrogenase, NAD-dependent, C-terminal	1	0.208441	0.119842	Over	P21695
cd14209	CDD	STKc_PKA	1	0.208441	0.119842	Over	P22694
IPR011766	interpro	Thiamine pyrophosphate enzyme, C-terminal TPP-binding	1	0.208441	0.119842	Over	Q9UJ83
IPR012001	interpro	Thiamine pyrophosphate enzyme, N-terminal TPP-binding domain	1	0.208441	0.119842	Over	Q9UJ83
cd02004	CDD	TPP_BZL_OCoD_HPCL	1	0.208441	0.119842	Over	Q9UJ83
IPR012000	interpro	Thiamine pyrophosphate enzyme, central domain	1	0.208441	0.119842	Over	Q9UJ83
cd07035	CDD	TPP_PYR_POX_like	1	0.208441	0.119842	Over	Q9UJ83
cd05332	CDD	11beta-HSD1_like_SDR_c	1	0.208441	0.119842	Over	Q9Y394
IPR019378	interpro	GDP-fucose protein O-fucosyltransferase	1	0.208441	0.119842	Over	Q9Y2G5
IPR017046	interpro	Prenylcysteine oxidase	1	0.208441	0.119842	Over	Q8NBM8
IPR010795	interpro	Prenylcysteine lyase	1	0.208441	0.119842	Over	Q8NBM8
IPR035466	interpro	GlmS/AgaS, SIS domain 1	1	0.208441	0.119842	Over	O94808
IPR001347	interpro	Sugar isomerase (SIS)	1	0.208441	0.119842	Over	O94808
IPR005855	interpro	Glucosamine-fructose-6-phosphate aminotransferase, isomerising	1	0.208441	0.119842	Over	O94808
IPR035490	interpro	GlmS/FrlB, SIS domain 2	1	0.208441	0.119842	Over	O94808
cd00714	CDD	GFAT	1	0.208441	0.119842	Over	O94808
IPR011685	interpro	LETM1-like	1	0.208441	0.119842	Over	Q6P1Q0
IPR033122	interpro	Letm1 ribosome-binding domain	1	0.208441	0.119842	Over	Q6P1Q0
IPR005900	interpro	6-phosphogluconolactonase, DevB-type	1	0.208441	0.119842	Over	O95479
IPR022675	interpro	Glucose-6-phosphate dehydrogenase, C-terminal	1	0.208441	0.119842	Over	O95479
IPR001282	interpro	Glucose-6-phosphate dehydrogenase	1	0.208441	0.119842	Over	O95479
IPR022674	interpro	Glucose-6-phosphate dehydrogenase, NAD-binding	1	0.208441	0.119842	Over	O95479
IPR019796	interpro	Glucose-6-phosphate dehydrogenase, active site	1	0.208441	0.119842	Over	O95479
IPR011050	interpro	Pectin lyase fold/virulence factor	1	0.208441	0.119842	Over	Q9UHN6
IPR028343	interpro	Fructose-1,6-bisphosphatase	1	0.208441	0.119842	Over	P09467
IPR000146	interpro	Fructose-1,6-bisphosphatase class 1	1	0.208441	0.119842	Over	P09467
IPR020548	interpro	Fructose-1,6-bisphosphatase, active site	1	0.208441	0.119842	Over	P09467
IPR033391	interpro	Fructose-1-6-bisphosphatase class I, N-terminal	1	0.208441	0.119842	Over	P09467
IPR002655	interpro	Acyl-CoA oxidase, C-terminal	1	0.208441	0.119842	Over	Q15067
IPR012258	interpro	Acyl-CoA oxidase	1	0.208441	0.119842	Over	Q15067
IPR034171	interpro	Peroxisomal acyl-coenzyme A oxidase	1	0.208441	0.119842	Over	Q15067
IPR001507	interpro	Zona pellucida domain	1	0.208441	0.119842	Over	P17813
IPR007397	interpro	F-box associated (FBA) domain	1	0.208441	0.119842	Over	Q9UK22
IPR037872	interpro	Rab3	1	0.208441	0.119842	Over	O95716
PF06664	Pfam	Wnt-binding factor required for Wnt secretion	1	0.208441	0.119842	Over	Q9P2C4
IPR031964	interpro	Caspase recruitment domain	1	0.208441	0.119842	Over	O95786
IPR013980	interpro	MANSC domain	1	0.208441	0.119842	Over	O43278
cd05022	CDD	S-100A13	1	0.208441	0.119842	Over	Q99584
cd15853	CDD	SNARE_Bet1	1	0.208441	0.119842	Over	Q9NYM9
cd05369	CDD	TER_DECR_SDR_a	1	0.208441	0.119842	Over	Q16698
IPR019610	interpro	Iron sulphur domain-containing, mitoNEET, N-terminal	1	0.208441	0.119842	Over	Q9NZ45
IPR016447	interpro	Translocation associated membrane protein	1	0.208441	0.119842	Over	Q15629
IPR013599	interpro	TRAM1-like protein	1	0.208441	0.119842	Over	Q15629
IPR017968	interpro	Acylphosphatase, conserved site	1	0.208441	0.119842	Over	P07311
IPR020456	interpro	Acylphosphatase	1	0.208441	0.119842	Over	P07311
IPR001792	interpro	Acylphosphatase-like domain	1	0.208441	0.119842	Over	P07311
IPR036046	interpro	Acylphosphatase-like domain superfamily	1	0.208441	0.119842	Over	P07311
IPR003172	interpro	MD-2-related lipid-recognition domain	1	0.208441	0.119842	Over	P61916
IPR033294	interpro	Erlin1/2	1	0.208441	0.119842	Over	O94905
IPR031777	interpro	Sortilin, C-terminal	1	0.208441	0.119842	Over	Q99523
IPR031778	interpro	Sortilin, N-terminal	1	0.208441	0.119842	Over	Q99523
IPR006581	interpro	VPS10	1	0.208441	0.119842	Over	Q99523
cd09528	CDD	SAM_Samd9_Samd9L	1	0.208441	0.119842	Over	Q5K651
IPR005016	interpro	Serine incorporator/TMS membrane protein	1	0.208441	0.119842	Over	Q13530
IPR011893	interpro	Selenoprotein, Rdx-type	1	0.208441	0.119842	Over	P62341
IPR001453	interpro	MoaB/Mog domain	1	0.208441	0.119842	Over	Q8NFF5
IPR036425	interpro	MoaB/Mog-like domain superfamily	1	0.208441	0.119842	Over	Q8NFF5
IPR016054	interpro	Ly-6 antigen/uPA receptor-like	1	0.208441	0.119842	Over	P13987
IPR018363	interpro	CD59 antigen, conserved site	1	0.208441	0.119842	Over	P13987
cd00117	CDD	LU	1	0.208441	0.119842	Over	P13987
cd03761	CDD	proteasome_beta_type_5	1	0.208441	0.119842	Over	P28062
IPR038554	interpro	Dipeptidylpeptidase IV, N-terminal domain superfamily	1	0.208441	0.119842	Over	P27487
IPR002469	interpro	Dipeptidylpeptidase IV, N-terminal domain	1	0.208441	0.119842	Over	P27487
IPR031943	interpro	CARMIL, C-terminal domain	1	0.208441	0.119842	Over	Q6F5E8
IPR019400	interpro	Peptidase C65, otubain	1	0.208441	0.119842	Over	Q96DC9
IPR016615	interpro	Ubiquitin thioesterase Otubain	1	0.208441	0.119842	Over	Q96DC9
IPR012466	interpro	NECAP, PHear domain	1	0.208441	0.119842	Over	Q9NVZ3
IPR020578	interpro	Aminotransferase class-V, pyridoxal-phosphate binding site	1	0.208441	0.119842	Over	Q9Y617
cd01816	CDD	Raf_RBD	1	0.208441	0.119842	Over	P04049
IPR007861	interpro	DNA mismatch repair protein MutS, clamp	1	0.208441	0.119842	Over	P43246
IPR002051	interpro	Haem oxygenase	1	0.208441	0.119842	Over	P09601
IPR016053	interpro	Haem oxygenase-like	1	0.208441	0.119842	Over	P09601
IPR016084	interpro	Haem oxygenase-like, multi-helical	1	0.208441	0.119842	Over	P09601
IPR018207	interpro	Haem oxygenase conserved site	1	0.208441	0.119842	Over	P09601
cd01161	CDD	VLCAD	1	0.208441	0.119842	Over	P49748
cd01158	CDD	SCAD_SBCAD	1	0.208441	0.119842	Over	P16219
PF14965	Pfam	Negative regulator of p53/TP53	1	0.208441	0.119842	Over	Q8WY22
cd01446	CDD	DSP_MapKP	1	0.208441	0.119842	Over	P28562
IPR008343	interpro	Mitogen-activated protein (MAP) kinase phosphatase	1	0.208441	0.119842	Over	P28562
IPR003583	interpro	Helix-hairpin-helix DNA-binding motif, class 1	1	0.208441	0.119842	Over	Q14807
IPR013130	interpro	Ferric reductase transmembrane component-like domain	1	0.208441	0.119842	Over	Q658P3
cd10985	CDD	MH2_SMAD_2_3	1	0.208441	0.119842	Over	P84022
cd10491	CDD	MH1_SMAD_2_3	1	0.208441	0.119842	Over	P84022
IPR037515	interpro	Ribose-phosphate pyrophosphokinase, bacterial-type	1	0.208441	0.119842	Over	P11908
IPR000842	interpro	Phosphoribosyl pyrophosphate synthetase, conserved site	1	0.208441	0.119842	Over	P11908
IPR037844	interpro	ASAP, PH domain	1	0.208441	0.119842	Over	Q9ULH1
IPR019137	interpro	Nck-associated protein 1	1	0.208441	0.119842	Over	P55160
IPR001525	interpro	C-5 cytosine methyltransferase	1	0.208441	0.119842	Over	P26358
IPR031303	interpro	DNA methylase, C-5 cytosine-specific, conserved site	1	0.208441	0.119842	Over	P26358
cd00034	CDD	ChSh	1	0.208441	0.119842	Over	Q13185
IPR011722	interpro	Hemimethylated DNA-binding domain	1	0.208441	0.119842	Over	O94952
IPR036623	interpro	Hemimethylated DNA-binding domain superfamily	1	0.208441	0.119842	Over	O94952
IPR005532	interpro	Sulfatase-modifying factor enzyme	1	0.208441	0.119842	Over	Q8NBJ7
IPR013497	interpro	DNA topoisomerase, type IA, central	1	0.208441	0.119842	Over	Q13472
IPR023406	interpro	DNA topoisomerase, type IA, active site	1	0.208441	0.119842	Over	Q13472
IPR013824	interpro	DNA topoisomerase, type IA, central region, subdomain 1	1	0.208441	0.119842	Over	Q13472
IPR034144	interpro	DNA topoisomerase 3-like, TOPRIM domain	1	0.208441	0.119842	Over	Q13472
IPR023405	interpro	DNA topoisomerase, type IA, core domain	1	0.208441	0.119842	Over	Q13472
IPR013826	interpro	DNA topoisomerase, type IA, central region, subdomain 3	1	0.208441	0.119842	Over	Q13472
IPR003601	interpro	DNA topoisomerase, type IA, domain 2	1	0.208441	0.119842	Over	Q13472
IPR003602	interpro	DNA topoisomerase, type IA, DNA-binding domain	1	0.208441	0.119842	Over	Q13472
IPR000380	interpro	DNA topoisomerase, type IA	1	0.208441	0.119842	Over	Q13472
IPR013825	interpro	DNA topoisomerase, type IA, central region, subdomain 2	1	0.208441	0.119842	Over	Q13472
IPR012972	interpro	NLE	1	0.208441	0.119842	Over	Q9GZL7
IPR002925	interpro	Dienelactone hydrolase	1	0.208441	0.119842	Over	Q96DG6
IPR000297	interpro	Peptidyl-prolyl cis-trans isomerase, PpiC-type	1	0.208441	0.119842	Over	Q13526
IPR020855	interpro	Ureohydrolase, manganese-binding site	1	0.208441	0.119842	Over	P78540
IPR006035	interpro	Ureohydrolase	1	0.208441	0.119842	Over	P78540
IPR000175	interpro	Sodium:neurotransmitter symporter	1	0.208441	0.119842	Over	Q9UN76
IPR037272	interpro	Sodium:neurotransmitter symporter superfamily	1	0.208441	0.119842	Over	Q9UN76
IPR001977	interpro	Dephospho-CoA kinase	1	0.208441	0.119842	Over	Q13057
cd04178	CDD	Nucleostemin_like	1	0.208441	0.119842	Over	Q9BVP2
IPR027534	interpro	Ribosomal protein L12 family	1	0.208441	0.119842	Over	P05386
IPR038716	interpro	Ribosomal protein P1/P2, N-terminal domain	1	0.208441	0.119842	Over	P05386
cd03585	CDD	NTR_TIMP	1	0.208441	0.119842	Over	P35625
IPR001820	interpro	Protease inhibitor I35 (TIMP)	1	0.208441	0.119842	Over	P35625
IPR030490	interpro	Tissue inhibitor of metalloproteinase, conserved site	1	0.208441	0.119842	Over	P35625
IPR027465	interpro	Proteinase inhibitor I35b (TIMP), C-terminal	1	0.208441	0.119842	Over	P35625
IPR001090	interpro	Ephrin receptor ligand binding domain	1	0.208441	0.119842	Over	P29317
IPR016257	interpro	Ephrin receptor type-A /type-B	1	0.208441	0.119842	Over	P29317
IPR011641	interpro	Tyrosine-protein kinase ephrin type A/B receptor-like	1	0.208441	0.119842	Over	P29317
IPR001426	interpro	Tyrosine-protein kinase, receptor class V, conserved site	1	0.208441	0.119842	Over	P29317
IPR027936	interpro	Ephrin receptor, transmembrane domain	1	0.208441	0.119842	Over	P29317
IPR002060	interpro	Squalene/phytoene synthase	1	0.208441	0.119842	Over	Q330K2
IPR022801	interpro	Ribosomal protein S4/S9	1	0.208441	0.119842	Over	Q9NV31
IPR001912	interpro	Ribosomal protein S4/S9, N-terminal	1	0.208441	0.119842	Over	Q9NV31
IPR007677	interpro	Gasdermin	1	0.208441	0.119842	Over	P57764
IPR039041	interpro	Nav/unc-53 family	1	0.208441	0.119842	Over	Q8IVL1
PD329443	ProDom	REPEAT WD NEUROBEACHIN MEMBRANE LBA BEIGE-LIKE SPLICING ALTERNATIVE 3D-STRUCTURE TRAFFICKING	1	0.208441	0.119842	Over	Q8NFP9
IPR010508	interpro	Domain of unknown function DUF1088	1	0.208441	0.119842	Over	Q8NFP9
IPR007513	interpro	Uncharacterised protein family SERF	1	0.208441	0.119842	Over	Q9Y5V0
IPR004823	interpro	TATA box binding protein associated factor (TAF)	1	0.208441	0.119842	Over	P62805
IPR025761	interpro	FFD box	1	0.208441	0.119842	Over	Q9BX40
IPR025768	interpro	TFG box	1	0.208441	0.119842	Over	Q9BX40
cd12936	CDD	GUCT_RHII_Gualpha_beta	1	0.208441	0.119842	Over	Q9NR30
IPR012562	interpro	GUCT	1	0.208441	0.119842	Over	Q9NR30
cd11560	CDD	W2_eIF5C_like	1	0.208441	0.119842	Over	Q9Y6E2
IPR011530	interpro	Ribosomal RNA adenine dimethylase	1	0.208441	0.119842	Over	Q9UNQ2
IPR020596	interpro	Ribosomal RNA adenine methylase transferase, conserved site	1	0.208441	0.119842	Over	Q9UNQ2
IPR000818	interpro	TEA/ATTS domain	1	0.208441	0.119842	Over	P28347
IPR016361	interpro	Transcriptional enhancer factor, metazoa	1	0.208441	0.119842	Over	P28347
IPR038096	interpro	TEA/ATTS domain superfamily	1	0.208441	0.119842	Over	P28347
cd16613	CDD	RING-HC_UHRF	1	0.208441	0.119842	Over	Q96T88
IPR021991	interpro	UHRF1, tandem tudor domain	1	0.208441	0.119842	Over	Q96T88
IPR003105	interpro	SRA-YDG	1	0.208441	0.119842	Over	Q96T88
cd01797	CDD	NIRF_N	1	0.208441	0.119842	Over	Q96T88
IPR036987	interpro	SRA-YDG superfamily	1	0.208441	0.119842	Over	Q96T88
cd03119	CDD	alpha_CA_I_II_III_XIII	1	0.208441	0.119842	Over	P00918
IPR006984	interpro	rRNA-processing protein Fcf1/Utp23	1	0.208441	0.119842	Over	Q9Y324
cd00821	CDD	PH	1	0.208441	0.119842	Over	Q53GA4
cd08591	CDD	PI-PLCc_beta	1	0.208441	0.119842	Over	Q15147
IPR009535	interpro	Phospholipase C-beta, conserved site	1	0.208441	0.119842	Over	Q15147
IPR029909	interpro	Actin-related protein 1 family	1	0.208441	0.119842	Over	P42025
IPR023415	interpro	Low-density lipoprotein (LDL) receptor class A, conserved site	2	0.213211	0.123538	Over	Q07954 O43278
IPR001314	interpro	Peptidase S1A, chymotrypsin family	2	0.213211	0.123538	Over	P00749 P07477
IPR014710	interpro	RmlC-like jelly roll fold	2	0.213211	0.123538	Over	Q9Y4G8 Q9BV57
IPR011705	interpro	BTB/Kelch-associated	2	0.213211	0.123538	Over	Q9H2C0 Q8NAB2
IPR023779	interpro	Chromo domain, conserved site	2	0.213211	0.123538	Over	P45973 Q13185
cd01390	CDD	HMGB-UBF_HMG-box	2	0.213211	0.123538	Over	Q00059 O15347
IPR016024	interpro	Armadillo-type fold	9	0.22646	0.131384	Under	Q8NDA8 Q7Z3E5 Q9Y6D6 P42345 O75691 Q15397 Q8NFP9 Q9Y6E2 Q9BQG0
IPR013083	interpro	Zinc finger, RING/FYVE/PHD-type	5	0.227296	0.132039	Under	Q99942 Q6UWE0 Q9BQS8 Q96PM5 Q96T88
IPR001254	interpro	Serine proteases, trypsin domain	2	0.248759	0.145063	Over	P00749 P07477
IPR001791	interpro	Laminin G domain	2	0.248759	0.145063	Over	P20908 O75093
IPR006652	interpro	Kelch repeat type 1	2	0.248759	0.145063	Over	Q9H2C0 Q8NAB2
IPR023313	interpro	Ubiquitin-conjugating enzyme, active site	3	0.259745	0.151663	Over	O14933 P49459 P63146
IPR023795	interpro	Serpin, conserved site	2	0.261123	0.167281	Over	P05121 P35237
IPR000215	interpro	Serpin family	2	0.261123	0.167281	Over	P05121 P35237
IPR023796	interpro	Serpin domain	2	0.261123	0.167281	Over	P05121 P35237
IPR036186	interpro	Serpin superfamily	2	0.261123	0.167281	Over	P05121 P35237
IPR002172	interpro	Low-density lipoprotein (LDL) receptor class A repeat	2	0.261123	0.167281	Over	Q07954 O43278
IPR003131	interpro	Potassium channel tetramerisation-type BTB domain	2	0.261123	0.167281	Over	Q4G0X4 Q96CX2
IPR015915	interpro	Kelch-type beta propeller	2	0.261123	0.167281	Over	Q9H2C0 Q8NAB2
IPR003598	interpro	Immunoglobulin subtype 2	4	0.261123	0.167816	Over	P43121 Q13308 Q9Y624 Q01973
IPR013320	interpro	Concanavalin A-like lectin/glucanase domain superfamily	6	0.261123	0.171064	Over	P09382 P20908 O75093 Q8WW59 Q1KMD3 Q8NFP9
IPR017956	interpro	AT hook, DNA-binding motif	1	0.261123	0.174277	Over	P52926
IPR036572	interpro	Doublecortin domain superfamily	1	0.261123	0.174277	Over	O15075
IPR000203	interpro	GPS motif	1	0.261123	0.174277	Over	Q9Y653
IPR017981	interpro	GPCR, family 2-like	1	0.261123	0.174277	Over	Q9Y653
IPR009069	interpro	Cysteine alpha-hairpin motif superfamily	1	0.261123	0.174277	Over	Q14061
PR01077	PRINTS	Claudin family signature	1	0.261123	0.174277	Over	O95832
IPR006187	interpro	Claudin	1	0.261123	0.174277	Over	O95832
IPR017974	interpro	Claudin, conserved site	1	0.261123	0.174277	Over	O95832
IPR029341	interpro	FAM21/CAPZIP domain	1	0.261123	0.174277	Over	Q6JBY9
IPR006650	interpro	Adenosine/AMP deaminase active site	1	0.261123	0.174277	Over	Q01432
IPR000033	interpro	LDLR class B repeat	1	0.261123	0.174277	Over	Q07954
IPR017305	interpro	Leupaxin/Paxillin/TGFB1I1	1	0.261123	0.174277	Over	O60711
IPR032472	interpro	Argonaute linker 2 domain	1	0.261123	0.174277	Over	Q9UKV8
IPR003165	interpro	Piwi domain	1	0.261123	0.174277	Over	Q9UKV8
cd04657	CDD	Piwi_ago-like	1	0.261123	0.174277	Over	Q9UKV8
IPR032473	interpro	Protein argonaute, Mid domain	1	0.261123	0.174277	Over	Q9UKV8
IPR014811	interpro	Argonaute, linker 1 domain	1	0.261123	0.174277	Over	Q9UKV8
IPR032474	interpro	Protein argonaute, N-terminal	1	0.261123	0.174277	Over	Q9UKV8
cd02846	CDD	PAZ_argonaute_like	1	0.261123	0.174277	Over	Q9UKV8
IPR019807	interpro	Hexokinase, binding site	1	0.261123	0.174277	Over	Q2TB90
IPR001312	interpro	Hexokinase	1	0.261123	0.174277	Over	Q2TB90
IPR022672	interpro	Hexokinase, N-terminal	1	0.261123	0.174277	Over	Q2TB90
IPR022673	interpro	Hexokinase, C-terminal	1	0.261123	0.174277	Over	Q2TB90
IPR013151	interpro	Immunoglobulin	1	0.261123	0.174277	Over	P43121
IPR036849	interpro	Enolase-like, C-terminal domain superfamily	1	0.261123	0.174277	Over	P09104
IPR029017	interpro	Enolase-like, N-terminal	1	0.261123	0.174277	Over	P09104
IPR006207	interpro	Cystine knot, C-terminal	1	0.261123	0.174277	Over	O75093
IPR001006	interpro	Procollagen-lysine 5-dioxygenase	1	0.261123	0.174277	Over	O00469
IPR006977	interpro	Yip1 domain	1	0.261123	0.174277	Over	Q9BSR8
IPR003111	interpro	Lon, substrate-binding domain	1	0.261123	0.174277	Over	Q96SW2
IPR004910	interpro	Yippee/Mis18/Cereblon	1	0.261123	0.174277	Over	Q96SW2
IPR014645	interpro	Target of Myb protein 1	1	0.261123	0.174277	Over	O75674
cd03565	CDD	VHS_Tom1	1	0.261123	0.174277	Over	O75674
IPR005607	interpro	BSD domain	1	0.261123	0.174277	Over	Q9NW68
IPR015898	interpro	G-protein gamma-like domain	1	0.261123	0.174277	Over	P63218
IPR036284	interpro	G-protein gamma-like domain superfamily	1	0.261123	0.174277	Over	P63218
IPR001770	interpro	G-protein, gamma subunit	1	0.261123	0.174277	Over	P63218
PF06325	Pfam	Ribosomal protein L11 methyltransferase (PrmA)	1	0.261123	0.174277	Over	Q9NVM4
IPR004241	interpro	Autophagy protein Atg8 ubiquitin-like	1	0.261123	0.174277	Over	O95166
IPR014536	interpro	Sorting nexin 9 family	1	0.261123	0.174277	Over	Q96RF0
IPR019497	interpro	Sorting nexin protein, WASP-binding domain	1	0.261123	0.174277	Over	Q96RF0
IPR000533	interpro	Tropomyosin	1	0.261123	0.174277	Over	P09493
PF13522	Pfam	Glutamine amidotransferase domain	1	0.261123	0.174277	Over	O94808
IPR017904	interpro	ADF/Cofilin	1	0.261123	0.174277	Over	Q9Y281
IPR032629	interpro	Mon2, dimerisation and cyclophilin-binding domain	1	0.261123	0.174277	Over	Q9Y6D6
IPR015403	interpro	Sec7, C-terminal	1	0.261123	0.174277	Over	Q9Y6D6
IPR020717	interpro	Apoptosis regulator, Bcl-2, BH1 motif, conserved site	1	0.261123	0.174277	Over	Q16611
cd06845	CDD	Bcl-2_like	1	0.261123	0.174277	Over	Q16611
IPR020726	interpro	Apoptosis regulator, Bcl-2, BH2 motif, conserved site	1	0.261123	0.174277	Over	Q16611
IPR037684	interpro	Guanylate-binding protein, C-terminal	1	0.261123	0.174277	Over	P32456
cd01870	CDD	RhoA_like	1	0.261123	0.174277	Over	P08134
IPR004895	interpro	Prenylated rab acceptor PRA1	1	0.261123	0.174277	Over	O60831
IPR018967	interpro	Iron sulphur-containing domain, CDGSH-type	1	0.261123	0.174277	Over	Q9NZ45
IPR018506	interpro	Cytochrome b5, heme-binding site	1	0.261123	0.174277	Over	O43169
IPR029759	interpro	Glutathione peroxidase active site	1	0.261123	0.174277	Over	P07203
IPR035778	interpro	Heterogeneous nuclear ribonucleoprotein U, SPRY domain	1	0.261123	0.174277	Over	Q1KMD3
IPR036857	interpro	Thyroglobulin type-1 superfamily	1	0.261123	0.174277	Over	P16422
IPR000716	interpro	Thyroglobulin type-1	1	0.261123	0.174277	Over	P16422
IPR002471	interpro	Peptidase S9, serine active site	1	0.261123	0.174277	Over	P27487
IPR003116	interpro	Raf-like Ras-binding	1	0.261123	0.174277	Over	P04049
IPR007696	interpro	DNA mismatch repair protein MutS, core	1	0.261123	0.174277	Over	P43246
IPR000432	interpro	DNA mismatch repair protein MutS, C-terminal	1	0.261123	0.174277	Over	P43246
IPR007695	interpro	DNA mismatch repair protein MutS-like, N-terminal	1	0.261123	0.174277	Over	P43246
IPR036187	interpro	DNA mismatch repair protein MutS, core domain superfamily	1	0.261123	0.174277	Over	P43246
IPR016151	interpro	DNA mismatch repair protein MutS, N-terminal	1	0.261123	0.174277	Over	P43246
IPR036678	interpro	MutS, connector domain superfamily	1	0.261123	0.174277	Over	P43246
IPR007860	interpro	DNA mismatch repair protein MutS, connector domain	1	0.261123	0.174277	Over	P43246
IPR036264	interpro	Bacterial exopeptidase dimerisation domain	1	0.261123	0.174277	Over	Q8IYS1
IPR000304	interpro	Pyrroline-5-carboxylate reductase	1	0.261123	0.174277	Over	Q96C36
IPR029036	interpro	Pyrroline-5-carboxylate reductase, dimerisation domain	1	0.261123	0.174277	Over	Q96C36
IPR020417	interpro	Atypical dual specificity phosphatase	1	0.261123	0.174277	Over	P28562
PF12836	Pfam	Helix-hairpin-helix motif	1	0.261123	0.174277	Over	Q14807
IPR010506	interpro	DMAP1-binding domain	1	0.261123	0.174277	Over	P26358
IPR010666	interpro	Zinc finger, GRF-type	1	0.261123	0.174277	Over	Q13472
IPR020067	interpro	Frizzled domain	1	0.261123	0.174277	Over	Q01973
IPR036790	interpro	Frizzled cysteine-rich domain superfamily	1	0.261123	0.174277	Over	Q01973
IPR017967	interpro	HMG box A DNA-binding domain, conserved site	1	0.261123	0.174277	Over	O15347
IPR007146	interpro	Sas10/Utp3/C1D	1	0.261123	0.174277	Over	Q9NQZ2
IPR033133	interpro	Pumilio homology domain	1	0.261123	0.174277	Over	Q15397
IPR001033	interpro	Alpha-catenin	1	0.261123	0.174277	Over	Q9UBT7
PF00428	Pfam	60s Acidic ribosomal protein	1	0.261123	0.174277	Over	P05386
IPR018935	interpro	RIO kinase, conserved site	1	0.261123	0.174277	Over	Q9BRS2
PF01163	Pfam	RIO1 family	1	0.261123	0.174277	Over	Q9BRS2
IPR000687	interpro	RIO kinase	1	0.261123	0.174277	Over	Q9BRS2
cd04150	CDD	Arf1_5_like	1	0.261123	0.174277	Over	P18085
IPR002942	interpro	RNA-binding S4 domain	1	0.261123	0.174277	Over	Q9NV31
IPR036986	interpro	RNA-binding S4 domain superfamily	1	0.261123	0.174277	Over	Q9NV31
cd04666	CDD	Nudix_Hydrolase_9	1	0.261123	0.174277	Over	Q9NZJ9
PF13385	Pfam	Concanavalin A-like lectin/glucanases superfamily	1	0.261123	0.174277	Over	Q8NFP9
cd14717	CDD	bZIP_Maf_small	1	0.261123	0.174277	Over	O60675
IPR004826	interpro	Basic leucine zipper domain, Maf-type	1	0.261123	0.174277	Over	O60675
IPR024874	interpro	Transcription factor Maf family	1	0.261123	0.174277	Over	O60675
IPR025609	interpro	Lsm14-like, N-terminal	1	0.261123	0.174277	Over	Q9BX40
IPR025762	interpro	DFDF domain	1	0.261123	0.174277	Over	Q9BX40
IPR019050	interpro	FDF domain	1	0.261123	0.174277	Over	Q9BX40
IPR001737	interpro	Ribosomal RNA adenine methyltransferase KsgA/Erm	1	0.261123	0.174277	Over	Q9UNQ2
IPR020598	interpro	Ribosomal RNA adenine methylase transferase, N-terminal	1	0.261123	0.174277	Over	Q9UNQ2
PF13909	Pfam	C2H2-type zinc-finger domain	1	0.261123	0.174277	Over	Q92766
IPR018338	interpro	Carbonic anhydrase, alpha-class, conserved site	1	0.261123	0.174277	Over	P00918
IPR023561	interpro	Carbonic anhydrase, alpha-class	1	0.261123	0.174277	Over	P00918
cd01368	CDD	KISc_KIF23_like	1	0.261123	0.174277	Over	O95235
IPR016280	interpro	Phosphatidylinositol-4, 5-bisphosphate phosphodiesterase beta	1	0.261123	0.174277	Over	Q15147
IPR037862	interpro	PLC-beta, PH domain	1	0.261123	0.174277	Over	Q15147
IPR020472	interpro	G-protein beta WD-40 repeat	1	0.272379	0.181992	Under	Q9GZL7
cd00200	CDD	WD40	1	0.277028	0.185305	Under	Q9GZL7
IPR008927	interpro	6-phosphogluconate dehydrogenase-like, C-terminal domain superfamily	2	0.283453	0.190025	Over	P21695 Q96C36
IPR023780	interpro	Chromo domain	2	0.283453	0.190025	Over	P45973 Q13185
IPR011989	interpro	Armadillo-like helical	4	0.288823	0.193841	Under	Q8NDA8 Q7Z3E5 P42345 Q15397
IPR011990	interpro	Tetratricopeptide-like helical domain superfamily	4	0.290369	0.195095	Under	Q6ZXV5 P09914 P42345 P50502
PF13920	Pfam	Zinc finger, C3HC4 type (RING finger)	2	0.313158	0.213146	Over	Q99942 Q6UWE0
IPR015947	interpro	PUA-like superfamily	2	0.313158	0.213146	Over	Q96SW2 Q96T88
IPR006671	interpro	Cyclin, N-terminal	2	0.313158	0.213146	Over	P20248 P14635
IPR001452	interpro	SH3 domain	3	0.313158	0.217583	Under	Q96RF0 Q9Y5K6 Q9ULH1
IPR000562	interpro	Fibronectin type II domain	1	0.313158	0.225352	Over	P02751
IPR036943	interpro	Fibronectin type II domain superfamily	1	0.313158	0.225352	Over	P02751
PR00013	PRINTS	Fibronectin type II repeat signature	1	0.313158	0.225352	Over	P02751
IPR006571	interpro	TLDc domain	1	0.313158	0.225352	Over	Q6P9B6
IPR001365	interpro	Adenosine/AMP deaminase domain	1	0.313158	0.225352	Over	Q01432
IPR025660	interpro	Cysteine peptidase, histidine active site	1	0.313158	0.225352	Over	P07858
IPR005845	interpro	Alpha-D-phosphohexomutase, alpha/beta/alpha domain II	1	0.313158	0.225352	Over	Q6PCE3
IPR005846	interpro	Alpha-D-phosphohexomutase, alpha/beta/alpha domain III	1	0.313158	0.225352	Over	Q6PCE3
IPR005843	interpro	Alpha-D-phosphohexomutase, C-terminal	1	0.313158	0.225352	Over	Q6PCE3
IPR001079	interpro	Galectin, carbohydrate recognition domain	1	0.313158	0.225352	Over	P09382
IPR004240	interpro	Nonaspanin (TM9SF)	1	0.313158	0.225352	Over	O15321
IPR026752	interpro	Cavin family	1	0.313158	0.225352	Over	O95810
IPR003100	interpro	PAZ domain	1	0.313158	0.225352	Over	Q9UKV8
IPR036085	interpro	PAZ domain superfamily	1	0.313158	0.225352	Over	Q9UKV8
PR00475	PRINTS	Hexokinase family signature	1	0.313158	0.225352	Over	Q2TB90
IPR020858	interpro	Serum albumin-like	1	0.313158	0.225352	Over	Q16610
IPR000651	interpro	Ras-like guanine nucleotide exchange factor, N-terminal	1	0.313158	0.225352	Over	Q9Y4G8
IPR000483	interpro	Cysteine-rich flanking region, C-terminal	1	0.313158	0.225352	Over	O75093
IPR009637	interpro	Lung seven transmembrane receptor-like	1	0.313158	0.225352	Over	Q96K49
cd00104	CDD	KAZAL_FS	1	0.313158	0.225352	Over	Q12841
IPR036058	interpro	Kazal domain superfamily	1	0.313158	0.225352	Over	Q12841
IPR007111	interpro	NACHT nucleoside triphosphatase	1	0.313158	0.225352	Over	Q86W25
IPR004020	interpro	DAPIN domain	1	0.313158	0.225352	Over	Q86W25
IPR021852	interpro	Domain of unknown function DUF3456	1	0.313158	0.225352	Over	Q96HD1
IPR017932	interpro	Glutamine amidotransferase type 2 domain	1	0.313158	0.225352	Over	O94808
IPR032691	interpro	Guanine nucleotide exchange factor, N-terminal	1	0.313158	0.225352	Over	Q9Y6D6
IPR026298	interpro	Blc2 family	1	0.313158	0.225352	Over	Q16611
IPR020728	interpro	Apoptosis regulator, Bcl-2, BH3 motif, conserved site	1	0.313158	0.225352	Over	Q16611
IPR002475	interpro	Bcl2-like	1	0.313158	0.225352	Over	Q16611
IPR006148	interpro	Glucosamine/galactosamine-6-phosphate isomerase	1	0.313158	0.225352	Over	O95479
IPR007273	interpro	SCAMP	1	0.313158	0.225352	Over	Q969E2
IPR013784	interpro	Carbohydrate-binding-like fold	1	0.313158	0.225352	Over	Q15155
IPR036514	interpro	SGNH hydrolase superfamily	1	0.313158	0.225352	Over	Q9HAT2
IPR000542	interpro	Acyltransferase ChoActase/COT/CPT	1	0.313158	0.225352	Over	P43155
IPR001375	interpro	Peptidase S9, prolyl oligopeptidase, catalytic domain	1	0.313158	0.225352	Over	P27487
IPR000192	interpro	Aminotransferase class V domain	1	0.313158	0.225352	Over	Q9Y617
IPR007259	interpro	Gamma-tubulin complex component protein	1	0.313158	0.225352	Over	Q96RT7
IPR011650	interpro	Peptidase M20, dimerisation domain	1	0.313158	0.225352	Over	Q8IYS1
IPR002933	interpro	Peptidase M20	1	0.313158	0.225352	Over	Q8IYS1
IPR000664	interpro	Lethal(2) giant larvae protein	1	0.313158	0.225352	Over	Q15334
IPR013577	interpro	Lethal giant larvae homologue 2	1	0.313158	0.225352	Over	Q15334
IPR025313	interpro	Domain of unknown function DUF4217	1	0.313158	0.225352	Over	Q9NVP1
IPR005946	interpro	Ribose-phosphate pyrophosphokinase	1	0.313158	0.225352	Over	P11908
IPR029099	interpro	Ribose-phosphate pyrophosphokinase, N-terminal domain	1	0.313158	0.225352	Over	P11908
IPR006171	interpro	TOPRIM domain	1	0.313158	0.225352	Over	Q13472
IPR013111	interpro	EGF-like domain, extracellular	1	0.313158	0.225352	Over	P24821
IPR006941	interpro	Ribonuclease CAF1	1	0.313158	0.225352	Over	Q9UIV1
IPR002113	interpro	Adenine nucleotide translocator 1	1	0.313158	0.225352	Over	P12235
IPR001313	interpro	Pumilio RNA-binding repeat	1	0.313158	0.225352	Over	Q15397
IPR006077	interpro	Vinculin/alpha-catenin	1	0.313158	0.225352	Over	Q9UBT7
IPR004821	interpro	Cytidyltransferase-like domain	1	0.313158	0.225352	Over	Q13057
IPR008949	interpro	Isoprenoid synthase domain superfamily	1	0.313158	0.225352	Over	Q330K2
IPR036533	interpro	BAG domain superfamily	1	0.313158	0.225352	Over	Q99933
PF13912	Pfam	C2H2-type zinc finger	1	0.313158	0.225352	Over	Q92766
IPR002938	interpro	FAD-binding domain	1	0.313158	0.225352	Over	Q9Y2Z9
PR00420	PRINTS	Aromatic-ring hydroxylase (flavoprotein monooxygenase) signature	1	0.313158	0.225352	Over	Q9Y2Z9
cd14721	CDD	bZIP_Fos	1	0.313158	0.225352	Over	P15407
IPR036398	interpro	Alpha carbonic anhydrase domain superfamily	1	0.313158	0.225352	Over	P00918
IPR001148	interpro	Alpha carbonic anhydrase domain	1	0.313158	0.225352	Over	P00918
cd04413	CDD	NDPk_I	1	0.313158	0.225352	Over	P15531
IPR018247	interpro	EF-Hand 1, calcium-binding site	2	0.330153	0.237968	Under	P80303 P37235
IPR002110	interpro	Ankyrin repeat	2	0.330153	0.238075	Under	Q01484 Q9ULH1
IPR036770	interpro	Ankyrin repeat-containing domain superfamily	2	0.330171	0.23858	Under	Q01484 Q9ULH1
IPR020683	interpro	Ankyrin repeat-containing domain	2	0.330171	0.23858	Under	Q01484 Q9ULH1
IPR009003	interpro	Peptidase S1, PA clan	2	0.356865	0.259998	Over	P00749 P07477
IPR020904	interpro	Short-chain dehydrogenase/reductase, conserved site	2	0.356865	0.259998	Over	Q9Y394 Q6UWP2
IPR038508	interpro	ArfGAP domain superfamily	2	0.356865	0.259998	Over	Q9NP61 Q9ULH1
IPR001164	interpro	Arf GTPase activating protein	2	0.356865	0.259998	Over	Q9NP61 Q9ULH1
IPR037278	interpro	ARFGAP/RecO-like zinc finger	2	0.356865	0.259998	Over	Q9NP61 Q9ULH1
IPR036915	interpro	Cyclin-like superfamily	2	0.356865	0.259998	Over	P20248 P14635
IPR013763	interpro	Cyclin-like	2	0.356865	0.259998	Over	P20248 P14635
IPR004827	interpro	Basic-leucine zipper domain	2	0.356865	0.259998	Over	O60675 P15407
IPR016055	interpro	Alpha-D-phosphohexomutase, alpha/beta/alpha I/II/III	1	0.363194	0.273276	Over	Q6PCE3
IPR036900	interpro	Alpha-D-phosphohexomutase, C-terminal domain superfamily	1	0.363194	0.273276	Over	Q6PCE3
IPR005844	interpro	Alpha-D-phosphohexomutase, alpha/beta/alpha domain I	1	0.363194	0.273276	Over	Q6PCE3
cd03061	CDD	GST_N_CLIC	1	0.363194	0.273276	Over	O95833
IPR002946	interpro	Intracellular chloride channel	1	0.363194	0.273276	Over	O95833
IPR000237	interpro	GRIP domain	1	0.363194	0.273276	Over	Q92805
cd01860	CDD	Rab5_related	1	0.363194	0.273276	Over	P20339
IPR000372	interpro	Leucine-rich repeat N-terminal domain	1	0.363194	0.273276	Over	O75093
IPR002350	interpro	Kazal domain	1	0.363194	0.273276	Over	Q12841
IPR025799	interpro	Protein arginine N-methyltransferase	1	0.363194	0.273276	Over	Q9NVM4
PF13450	Pfam	NAD(P)-binding Rossmann-like domain	1	0.363194	0.273276	Over	Q8NBM8
IPR003191	interpro	Guanylate-binding protein/Atlastin, C-terminal	1	0.363194	0.273276	Over	P32456
IPR003151	interpro	PIK-related kinase, FAT	1	0.363194	0.273276	Over	P42345
IPR006011	interpro	Syntaxin, N-terminal domain	1	0.363194	0.273276	Over	Q12846
IPR002223	interpro	Pancreatic trypsin inhibitor Kunitz domain	1	0.363194	0.273276	Over	O43278
IPR036880	interpro	Pancreatic trypsin inhibitor Kunitz domain superfamily	1	0.363194	0.273276	Over	O43278
IPR020901	interpro	Proteinase inhibitor I2, Kunitz, conserved site	1	0.363194	0.273276	Over	O43278
IPR000906	interpro	ZU5 domain	1	0.363194	0.273276	Over	Q01484
PF13561	Pfam	Enoyl-(Acyl carrier protein) reductase	1	0.363194	0.273276	Over	Q16698
IPR000034	interpro	Laminin IV	1	0.363194	0.273276	Over	Q13753
IPR010994	interpro	RuvA domain 2-like	1	0.363194	0.273276	Over	Q14807
IPR007109	interpro	Brix domain	1	0.363194	0.273276	Over	Q9H9Y2
IPR002857	interpro	Zinc finger, CXXC-type	1	0.363194	0.273276	Over	P26358
PD936484	ProDom	POLYPROTEIN GLYCOPROTEIN M G2 TRANSMEMBRANE NONSTRUCTURAL MEMBRANE CONTAINS: PRECURSOR SIGNAL	1	0.363194	0.273276	Over	P24821
PR00886	PRINTS	High mobility group (HMG1/HMG2) protein signature	1	0.363194	0.273276	Over	O15347
IPR001134	interpro	Netrin domain	1	0.363194	0.273276	Over	P35625
IPR031570	interpro	Domain of unknown function DUF4704	1	0.363194	0.273276	Over	Q8NFP9
IPR003103	interpro	BAG domain	1	0.363194	0.273276	Over	Q99933
IPR003603	interpro	U2A'/phosphoprotein 32 family A, C-terminal	1	0.363194	0.273276	Over	Q92688
IPR000837	interpro	AP-1 transcription factor	1	0.363194	0.273276	Over	P15407
IPR002716	interpro	PIN domain	1	0.363194	0.273276	Over	Q9Y324
IPR023005	interpro	Nucleoside diphosphate kinase, active site	1	0.363194	0.273276	Over	P15531
IPR036291	interpro	NAD(P)-binding domain superfamily	8	0.368228	0.277338	Over	P21695 Q9Y394 Q96LJ7 O95479 Q16698 Q96C36 Q658P3 Q6UWP2
IPR000210	interpro	BTB/POZ domain	4	0.371539	0.280109	Over	Q4G0X4 Q9H2C0 Q8NAB2 Q96CX2
IPR016197	interpro	Chromo-like domain superfamily	2	0.375675	0.283507	Over	P45973 Q13185
IPR002048	interpro	EF-hand domain	3	0.376619	0.2845	Under	P80303 Q12841 P37235
IPR011333	interpro	SKP1/BTB/POZ domain superfamily	4	0.379039	0.286611	Over	Q4G0X4 Q9H2C0 Q8NAB2 Q96CX2
IPR036028	interpro	SH3-like domain superfamily	3	0.382863	0.289788	Under	Q96RF0 Q9Y5K6 Q9ULH1
IPR000953	interpro	Chromo/chromo shadow domain	2	0.403748	0.306945	Over	P45973 Q13185
IPR001810	interpro	F-box domain	2	0.403748	0.306945	Over	Q9UK22 Q96CD0
IPR002453	interpro	Beta tubulin	1	0.403748	0.318241	Over	Q13885
IPR013838	interpro	Beta tubulin, autoregulation binding site	1	0.403748	0.318241	Over	Q13885
cd02187	CDD	beta_tubulin	1	0.403748	0.318241	Over	Q13885
IPR013017	interpro	NHL repeat, subgroup	1	0.403748	0.318241	Over	Q5JS37
IPR001258	interpro	NHL repeat	1	0.403748	0.318241	Over	Q5JS37
PF13410	Pfam	Glutathione S-transferase, C-terminal domain	1	0.403748	0.318241	Over	O95833
IPR001895	interpro	Ras guanine-nucleotide exchange factors catalytic domain	1	0.403748	0.318241	Over	Q9Y4G8
IPR023578	interpro	Ras guanine nucleotide exchange factor domain superfamily	1	0.403748	0.318241	Over	Q9Y4G8
PF14559	Pfam	Tetratricopeptide repeat	1	0.403748	0.318241	Over	Q6ZXV5
IPR038425	interpro	GAT domain superfamily	1	0.403748	0.318241	Over	O75674
IPR004152	interpro	GAT domain	1	0.403748	0.318241	Over	O75674
IPR004012	interpro	RUN domain	1	0.403748	0.318241	Over	Q9BQS8
IPR037213	interpro	RUN domain superfamily	1	0.403748	0.318241	Over	Q9BQS8
IPR036834	interpro	Blc2-like superfamily	1	0.403748	0.318241	Over	Q16611
IPR015894	interpro	Guanylate-binding protein, N-terminal	1	0.403748	0.318241	Over	P32456
IPR036543	interpro	Guanylate-binding protein, C-terminal domain superfamily	1	0.403748	0.318241	Over	P32456
IPR030386	interpro	GB1/RHD3-type guanine nucleotide-binding (G) domain	1	0.403748	0.318241	Over	P32456
IPR003152	interpro	FATC domain	1	0.403748	0.318241	Over	P42345
IPR014009	interpro	PIK-related kinase	1	0.403748	0.318241	Over	P42345
IPR003892	interpro	Ubiquitin system component Cue	1	0.403748	0.318241	Over	Q9H0E2
IPR000243	interpro	Peptidase T1A, proteasome beta-subunit	1	0.403748	0.318241	Over	P28062
IPR024950	interpro	Dual specificity phosphatase	1	0.403748	0.318241	Over	P28562
PR00450	PRINTS	Recoverin family signature	1	0.403748	0.318241	Over	P37235
IPR017923	interpro	Transcription factor IIS, N-terminal	1	0.403748	0.318241	Over	Q96ST2
IPR036723	interpro	Alpha-catenin/vinculin-like superfamily	1	0.403748	0.318241	Over	Q9UBT7
IPR030378	interpro	Circularly permuted (CP)-type guanine nucleotide-binding (G) domain	1	0.403748	0.318241	Over	Q9BVP2
IPR008993	interpro	Tissue inhibitor of metalloproteinases-like, OB-fold	1	0.403748	0.318241	Over	P35625
cd02510	CDD	pp-GalNAc-T	1	0.403748	0.318241	Over	Q6P9A2
IPR000409	interpro	BEACH domain	1	0.403748	0.318241	Over	Q8NFP9
IPR023362	interpro	PH-BEACH domain	1	0.403748	0.318241	Over	Q8NFP9
IPR036372	interpro	BEACH domain superfamily	1	0.403748	0.318241	Over	Q8NFP9
IPR008917	interpro	Transcription factor, Skn-1-like, DNA-binding domain superfamily	1	0.403748	0.318241	Over	O60675
PF12874	Pfam	Zinc-finger of C2H2 type	1	0.403748	0.318241	Over	Q9Y5V0
IPR011051	interpro	RmlC-like cupin domain superfamily	1	0.403748	0.318241	Over	Q9BV57
IPR001564	interpro	Nucleoside diphosphate kinase	1	0.403748	0.318241	Over	P15531
IPR034907	interpro	Nucleoside diphosphate kinase-like domain	1	0.403748	0.318241	Over	P15531
IPR015359	interpro	Phosphoinositide-specific phospholipase C, EF-hand-like domain	1	0.403748	0.318241	Over	Q15147
IPR037196	interpro	HSP90, C-terminal domain	1	0.403748	0.318241	Over	Q58FF6
IPR001404	interpro	Heat shock protein Hsp90 family	1	0.403748	0.318241	Over	Q58FF6
IPR020575	interpro	Heat shock protein Hsp90, N-terminal	1	0.403748	0.318241	Over	Q58FF6
IPR000727	interpro	Target SNARE coiled-coil homology domain	2	0.417379	0.330231	Over	Q12846 Q9NYM9
IPR036910	interpro	High mobility group box domain superfamily	2	0.417379	0.330231	Over	Q00059 O15347
IPR009071	interpro	High mobility group box domain	2	0.417379	0.330231	Over	Q00059 O15347
IPR010920	interpro	LSM domain superfamily	2	0.417379	0.330231	Over	O15116 Q9BX40
IPR003593	interpro	AAA+ ATPase domain	7	0.421054	0.333452	Over	P28288 P08183 Q03518 Q03519 O14678 Q8IVL1 Q6PL18
PS51419	ProSiteProfiles	small GTPase Rab1 family profile.	4	0.426036	0.337716	Over	P20339 O95716 Q13637 O14966
IPR019821	interpro	Kinesin motor domain, conserved site	2	0.443836	0.353293	Over	Q14807 O95235
IPR002165	interpro	Plexin repeat	1	0.443836	0.360431	Over	O75326
IPR001627	interpro	Sema domain	1	0.443836	0.360431	Over	O75326
IPR036352	interpro	Sema domain superfamily	1	0.443836	0.360431	Over	O75326
IPR011013	interpro	Galactose mutarotase-like domain superfamily	1	0.443836	0.360431	Over	Q14697
IPR032444	interpro	Keratin type II head	1	0.443836	0.360431	Over	Q14533
IPR000169	interpro	Cysteine peptidase, cysteine active site	1	0.443836	0.360431	Over	P07858
IPR016129	interpro	Peptidase family C14A, His active site	1	0.443836	0.360431	Over	P49662
IPR000595	interpro	Cyclic nucleotide-binding domain	1	0.443836	0.360431	Over	Q9Y4G8
IPR018490	interpro	Cyclic nucleotide-binding-like	1	0.443836	0.360431	Over	Q9Y4G8
cd00110	CDD	LamG	1	0.443836	0.360431	Over	O75093
PR00014	PRINTS	Fibronectin type III repeat signature	1	0.443836	0.360431	Over	Q9Y2H6
IPR013328	interpro	6-phosphogluconate dehydrogenase, domain 2	1	0.443836	0.360431	Over	P21695
IPR000308	interpro	14-3-3 protein	1	0.443836	0.360431	Over	P31947
IPR036815	interpro	14-3-3 domain superfamily	1	0.443836	0.360431	Over	P31947
IPR023409	interpro	14-3-3 protein, conserved site	1	0.443836	0.360431	Over	P31947
IPR023410	interpro	14-3-3 domain	1	0.443836	0.360431	Over	P31947
IPR016491	interpro	Septin	1	0.443836	0.360431	Over	Q92599
IPR030379	interpro	Septin-type guanine nucleotide-binding (G) domain	1	0.443836	0.360431	Over	Q92599
cd01851	CDD	GBP	1	0.443836	0.360431	Over	P32456
IPR006634	interpro	TRAM/LAG1/CLN8 homology domain	1	0.443836	0.360431	Over	Q15629
PF13671	Pfam	AAA domain	1	0.443836	0.360431	Over	Q1KMD3
IPR001025	interpro	Bromo adjacent homology (BAH) domain	1	0.443836	0.360431	Over	P26358
IPR003307	interpro	W2 domain	1	0.443836	0.360431	Over	Q9Y6E2
cd02396	CDD	PCBP_like_KH	1	0.443836	0.360431	Over	Q9UNW9
IPR036850	interpro	Nucleoside diphosphate kinase-like domain superfamily	1	0.443836	0.360431	Over	P15531
IPR036412	interpro	HAD-like superfamily	1	0.449777	0.36559	Under	P23634
IPR017853	interpro	Glycoside hydrolase superfamily	2	0.460138	0.376071	Over	Q14697 P54803
IPR036397	interpro	Ribonuclease H superfamily	2	0.460138	0.376071	Over	Q9UKV8 Q9UIV1
cd00012	CDD	NBD_sugar-kinase_HSP70_actin	2	0.460138	0.376071	Over	Q2TB90 P42025
IPR013098	interpro	Immunoglobulin I-set	2	0.460138	0.376071	Over	Q13308 Q01973
IPR001752	interpro	Kinesin motor domain	2	0.460138	0.376071	Over	Q14807 O95235
IPR027640	interpro	Kinesin-like protein	2	0.460138	0.376071	Over	Q14807 O95235
IPR003054	interpro	Keratin, type II	1	0.480664	0.400015	Over	Q14533
IPR002138	interpro	Peptidase C14, caspase non-catalytic subunit p10	1	0.480664	0.400015	Over	P49662
IPR015917	interpro	Peptidase C14A, caspase catalytic domain	1	0.480664	0.400015	Over	P49662
IPR033139	interpro	Peptidase family C14A, cysteine active site	1	0.480664	0.400015	Over	P49662
IPR006068	interpro	Cation-transporting P-type ATPase, C-terminal	1	0.480664	0.400015	Over	P23634
IPR004014	interpro	Cation-transporting P-type ATPase, N-terminal	1	0.480664	0.400015	Over	P23634
IPR023394	interpro	Sec7, C-terminal domain superfamily	1	0.480664	0.400015	Over	Q9Y6D6
IPR000904	interpro	Sec7 domain	1	0.480664	0.400015	Over	Q9Y6D6
IPR035999	interpro	Sec7 domain superfamily	1	0.480664	0.400015	Over	Q9Y6D6
IPR017452	interpro	GPCR, rhodopsin-like, 7TM	1	0.480664	0.400015	Over	P55085
IPR000938	interpro	CAP Gly-rich domain	1	0.480664	0.400015	Over	P30622
IPR036859	interpro	CAP Gly-rich domain superfamily	1	0.480664	0.400015	Over	P30622
IPR020422	interpro	Dual specificity protein phosphatase domain	1	0.480664	0.400015	Over	P28562
IPR016187	interpro	C-type lectin fold	1	0.480664	0.400015	Over	Q8NBJ7
IPR023696	interpro	Ureohydrolase domain superfamily	1	0.480664	0.400015	Over	P78540
IPR035441	interpro	TFIIS/LEDGF domain superfamily	1	0.480664	0.400015	Over	Q96ST2
IPR020084	interpro	NUDIX hydrolase, conserved site	1	0.480664	0.400015	Over	Q9NZJ9
PF14580	Pfam	Leucine-rich repeat	1	0.480664	0.400015	Over	Q92688
IPR006636	interpro	Heat shock chaperonin-binding	1	0.480664	0.400015	Over	P50502
IPR029060	interpro	PIN-like domain superfamily	1	0.480664	0.400015	Over	Q9Y324
IPR001611	interpro	Leucine-rich repeat	5	0.487168	0.405792	Over	O75093 Q6UWE0 Q86W25 Q6F5E8 Q92688
IPR011029	interpro	Death-like domain superfamily	3	0.505633	0.421927	Over	P49662 Q86W25 Q01484
IPR000608	interpro	Ubiquitin-conjugating enzyme E2	3	0.505633	0.421927	Over	O14933 P49459 P63146
IPR001660	interpro	Sterile alpha motif domain	3	0.510649	0.429369	Over	Q6UWE0 Q5K651 P29317
IPR032466	interpro	Metal-dependent hydrolase	1	0.510649	0.437156	Over	Q01432
IPR029030	interpro	Caspase-like domain superfamily	1	0.510649	0.437156	Over	P49662
IPR001309	interpro	Peptidase C14, p20 domain	1	0.510649	0.437156	Over	P49662
PF00656	Pfam	Caspase domain	1	0.510649	0.437156	Over	P49662
IPR008160	interpro	Collagen triple helix repeat	1	0.510649	0.437156	Over	P20908
IPR036875	interpro	Zinc finger, CCHC-type superfamily	1	0.510649	0.437156	Over	Q9NUD5
PF00702	Pfam	haloacid dehalogenase-like hydrolase	1	0.510649	0.437156	Over	P23634
PF13246	Pfam	Cation transport ATPase (P-type)	1	0.510649	0.437156	Over	P23634
IPR000357	interpro	HEAT repeat	1	0.510649	0.437156	Over	Q8NDA8
IPR002014	interpro	VHS domain	1	0.510649	0.437156	Over	O75674
IPR029035	interpro	DHS-like NAD/FAD-binding domain superfamily	1	0.510649	0.437156	Over	Q9UJ83
IPR029061	interpro	Thiamin diphosphate-binding fold	1	0.510649	0.437156	Over	Q9UJ83
IPR036598	interpro	GOLD domain superfamily	1	0.510649	0.437156	Over	Q9BQS8
IPR000276	interpro	G protein-coupled receptor, rhodopsin-like	1	0.510649	0.437156	Over	P55085
IPR018252	interpro	Annexin repeat, conserved site	1	0.510649	0.437156	Over	Q5VT79
IPR037104	interpro	Annexin superfamily	1	0.510649	0.437156	Over	Q5VT79
IPR018502	interpro	Annexin repeat	1	0.510649	0.437156	Over	Q5VT79
IPR001464	interpro	Annexin	1	0.510649	0.437156	Over	Q5VT79
IPR001107	interpro	Band 7 domain	1	0.510649	0.437156	Over	O94905
IPR036873	interpro	Rhodanese-like domain superfamily	1	0.510649	0.437156	Over	P28562
IPR001763	interpro	Rhodanese-like domain	1	0.510649	0.437156	Over	P28562
IPR000836	interpro	Phosphoribosyltransferase domain	1	0.510649	0.437156	Over	P11908
PF16746	Pfam	BAR domain of APPL family	1	0.510649	0.437156	Over	Q9ULH1
IPR035992	interpro	Ricin B-like lectins	1	0.510649	0.437156	Over	Q6P9A2
IPR001711	interpro	Phospholipase C, phosphatidylinositol-specific, Y domain	1	0.510649	0.437156	Over	Q15147
IPR001192	interpro	Phosphoinositide phospholipase C family	1	0.510649	0.437156	Over	Q15147
IPR000909	interpro	Phosphatidylinositol-specific phospholipase C, X domain	1	0.510649	0.437156	Over	Q15147
cd00275	CDD	C2_PLC_like	1	0.510649	0.437156	Over	Q15147
IPR001478	interpro	PDZ domain	2	0.514887	0.441551	Under	Q8IVF2 Q9Y4G8
IPR036034	interpro	PDZ superfamily	2	0.514887	0.441551	Under	Q8IVF2 Q9Y4G8
IPR014729	interpro	Rossmann-like alpha/beta/alpha sandwich fold	3	0.519927	0.446261	Over	Q8NFF5 Q7Z7A3 Q13057
PR00449	PRINTS	Transforming protein P21 ras signature	6	0.542378	0.471602	Over	P11234 P20339 P08134 O95716 Q13637 O14966
IPR006620	interpro	Prolyl 4-hydroxylase, alpha subunit	1	0.542378	0.472002	Over	O00469
IPR003879	interpro	Butyrophylin-like, SPRY domain	1	0.542378	0.472002	Over	Q8WW59
IPR029062	interpro	Class I glutamine amidotransferase-like	1	0.542378	0.472002	Over	Q92820
IPR002108	interpro	Actin-depolymerising factor homology domain	1	0.542378	0.472002	Over	Q9Y281
IPR037171	interpro	NagB/RpiA transferase-like	1	0.542378	0.472002	Over	O95479
IPR006012	interpro	Syntaxin/epimorphin, conserved site	1	0.542378	0.472002	Over	Q12846
IPR004148	interpro	BAR domain	1	0.542378	0.472002	Over	Q9NQY0
IPR001199	interpro	Cytochrome b5-like heme/steroid binding domain	1	0.542378	0.472002	Over	O43169
IPR036400	interpro	Cytochrome b5-like heme/steroid binding domain superfamily	1	0.542378	0.472002	Over	O43169
IPR023333	interpro	Proteasome B-type subunit	1	0.542378	0.472002	Over	P28062
IPR020454	interpro	Diacylglycerol/phorbol-ester binding	1	0.542378	0.472002	Over	P04049
IPR029057	interpro	Phosphoribosyltransferase-like	1	0.542378	0.472002	Over	P11908
IPR029047	interpro	Heat shock protein 70kD, peptide-binding domain superfamily	1	0.542378	0.472002	Over	Q0VDF9
IPR000772	interpro	Ricin B, lectin domain	1	0.542378	0.472002	Over	Q6P9A2
IPR017946	interpro	PLC-like phosphodiesterase, TIM beta/alpha-barrel domain superfamily	1	0.542378	0.472002	Over	Q15147
IPR029044	interpro	Nucleotide-diphospho-sugar transferases	3	0.55759	0.486072	Over	Q9Y673 O00469 Q6P9A2
IPR013761	interpro	Sterile alpha motif/pointed domain superfamily	3	0.55759	0.486072	Over	Q6UWE0 Q5K651 P29317
IPR017441	interpro	Protein kinase, ATP binding site	11	0.563451	0.491602	Over	O15075 P30530 P22694 P04049 Q99986 P46734 P49761 P29317 P53350 P49759 P00533
IPR001315	interpro	CARD domain	1	0.574531	0.504696	Over	P49662
PF13432	Pfam	Tetratricopeptide repeat	1	0.574531	0.504696	Over	Q6ZXV5
IPR005123	interpro	Oxoglutarate/iron-dependent dioxygenase	1	0.574531	0.504696	Over	O00469
IPR016050	interpro	Proteasome beta-type subunit, conserved site	1	0.574531	0.504696	Over	P28062
IPR000340	interpro	Dual specificity phosphatase, catalytic domain	1	0.574531	0.504696	Over	P28562
IPR013126	interpro	Heat shock protein 70 family	1	0.574531	0.504696	Over	Q0VDF9
IPR018181	interpro	Heat shock protein 70, conserved site	1	0.574531	0.504696	Over	Q0VDF9
IPR004001	interpro	Actin, conserved site	1	0.574531	0.504696	Over	P42025
IPR001965	interpro	Zinc finger, PHD-type	1	0.585262	0.514559	Under	Q96T88
IPR023214	interpro	HAD superfamily	1	0.586075	0.515711	Under	P23634
PS51257	ProSiteProfiles	Prokaryotic membrane lipoprotein lipid attachment site profile.	4	0.601282	0.53384	Over	Q6ZXV5 P61009 P55085 P17813
IPR027267	interpro	AH/BAR domain superfamily	4	0.601282	0.53384	Over	Q96RF0 Q9NQY0 Q9ULH1 Q9H939
IPR016201	interpro	PSI domain	1	0.601282	0.53537	Over	O75326
IPR013780	interpro	Glycosyl hydrolase, all-beta	1	0.601282	0.53537	Over	Q14697
IPR001179	interpro	FKBP-type peptidyl-prolyl cis-trans isomerase domain	1	0.601282	0.53537	Over	Q00688
IPR009038	interpro	GOLD domain	1	0.601282	0.53537	Over	Q9BQS8
IPR003578	interpro	Small GTPase superfamily, Rho type	1	0.601282	0.53537	Over	P08134
IPR036940	interpro	Phosphatidylinositol 3-/4-kinase, catalytic domain superfamily	1	0.601282	0.53537	Over	P42345
IPR018936	interpro	Phosphatidylinositol 3/4-kinase, conserved site	1	0.601282	0.53537	Over	P42345
IPR010989	interpro	SNARE	1	0.601282	0.53537	Over	Q12846
PF13857	Pfam	Ankyrin repeats (many copies)	1	0.601282	0.53537	Over	Q01484
IPR011701	interpro	Major facilitator superfamily	1	0.601282	0.53537	Over	Q8NBI5
IPR020902	interpro	Actin/actin-like conserved site	1	0.601282	0.53537	Over	P42025
IPR001060	interpro	FCH domain	1	0.601282	0.53537	Over	Q9H939
IPR029058	interpro	Alpha/Beta hydrolase fold	4	0.604438	0.53863	Over	P10619 P27487 Q96DG6 Q9H3G5
IPR011992	interpro	EF-hand domain pair	5	0.623004	0.555639	Under	P80303 Q12841 Q99584 P37235 Q15147
IPR011009	interpro	Protein kinase-like domain superfamily	15	0.628342	0.562768	Over	O15075 P30530 Q13308 P22694 P42345 P04049 Q99986 P46734 P49761 Q01973 P29317 Q9BRS2 P53350 P49759 P00533
IPR001878	interpro	Zinc finger, CCHC-type	1	0.628342	0.564149	Over	Q9NUD5
IPR023566	interpro	Peptidyl-prolyl cis-trans isomerase, FKBP-type	1	0.628342	0.564149	Over	Q00688
IPR039358	interpro	Sorting nexin-like	1	0.628342	0.564149	Over	Q96RF0
IPR000488	interpro	Death domain	1	0.628342	0.564149	Over	Q01484
IPR002067	interpro	Mitochondrial carrier protein	1	0.628342	0.564149	Over	P12235
IPR036443	interpro	Zinc finger, RanBP2-type superfamily	1	0.628342	0.564149	Over	Q8N488
IPR001876	interpro	Zinc finger, RanBP2-type	1	0.628342	0.564149	Over	Q8N488
IPR011011	interpro	Zinc finger, FYVE/PHD-type	2	0.648649	0.582865	Under	Q9BQS8 Q96T88
cd00009	CDD	AAA	2	0.650846	0.587846	Under	Q8IVL1 Q6PL18
cd00992	CDD	PDZ_signaling	2	0.650846	0.59026	Under	Q8IVF2 Q9Y4G8
PR00119	PRINTS	P-type cation-transporting ATPase superfamily signature	1	0.650846	0.591149	Over	P23634
PF13637	Pfam	Ankyrin repeats (many copies)	1	0.650846	0.591149	Over	Q01484
IPR013787	interpro	S100/CaBP-9k-type, calcium binding, subdomain	1	0.650846	0.591149	Over	Q99584
IPR005135	interpro	Endonuclease/exonuclease/phosphatase	1	0.650846	0.591149	Over	Q6L8Q7
IPR036691	interpro	Endonuclease/exonuclease/phosphatase superfamily	1	0.650846	0.591149	Over	Q6L8Q7
IPR011032	interpro	GroES-like superfamily	1	0.650846	0.591149	Over	P61604
IPR006073	interpro	GTP binding domain	1	0.650846	0.591149	Over	Q9BVP2
IPR024156	interpro	Small GTPase superfamily, ARF type	1	0.650846	0.591149	Over	P18085
IPR000086	interpro	NUDIX hydrolase domain	1	0.650846	0.591149	Over	Q9NZJ9
IPR003347	interpro	JmjC domain	1	0.650846	0.591149	Over	Q8IUF8
IPR031160	interpro	F-BAR domain	1	0.650846	0.591149	Over	Q9H939
IPR032675	interpro	Leucine-rich repeat domain superfamily	5	0.667771	0.611381	Over	O75093 Q6UWE0 Q86W25 Q96CD0 Q92688
IPR004045	interpro	Glutathione S-transferase, N-terminal	1	0.667771	0.61648	Over	O95833
IPR001757	interpro	P-type ATPase	1	0.667771	0.61648	Over	P23634
PF00122	Pfam	E1-E2 ATPase	1	0.667771	0.61648	Over	P23634
SFLDF00027	SFLD	p-type atpase	1	0.667771	0.61648	Over	P23634
IPR018303	interpro	P-type ATPase, phosphorylation site	1	0.667771	0.61648	Over	P23634
IPR023298	interpro	P-type ATPase, transmembrane domain superfamily	1	0.667771	0.61648	Over	P23634
SFLDG00002	SFLD	C1.7: P-type atpase like	1	0.667771	0.61648	Over	P23634
IPR008250	interpro	P-type ATPase, A domain superfamily	1	0.667771	0.61648	Over	P23634
IPR023299	interpro	P-type ATPase, cytoplasmic domain N	1	0.667771	0.61648	Over	P23634
IPR021133	interpro	HEAT, type 2	1	0.667771	0.61648	Over	Q8NDA8
IPR029052	interpro	Metallo-dependent phosphatase-like	1	0.667771	0.61648	Over	P21589
IPR004843	interpro	Calcineurin-like phosphoesterase domain, ApaH type	1	0.667771	0.61648	Over	P21589
PF13424	Pfam	Tetratricopeptide repeat	1	0.667771	0.61648	Over	P09914
IPR000403	interpro	Phosphatidylinositol 3-/4-kinase, catalytic domain	1	0.667771	0.61648	Over	P42345
IPR018253	interpro	DnaJ domain, conserved site	1	0.667771	0.61648	Over	Q99543
IPR006689	interpro	Small GTPase superfamily, ARF/SAR type	1	0.667771	0.61648	Over	P18085
IPR014722	interpro	Ribosomal protein L2, domain 2	1	0.667771	0.61648	Over	O60870
IPR004000	interpro	Actin family	1	0.667771	0.61648	Over	P42025
IPR003594	interpro	Histidine kinase/HSP90-like ATPase	1	0.667771	0.61648	Over	Q58FF6
IPR019734	interpro	Tetratricopeptide repeat	3	0.679636	0.627941	Under	Q6ZXV5 P09914 P50502
IPR013026	interpro	Tetratricopeptide repeat-containing domain	3	0.681795	0.630444	Under	Q6ZXV5 P09914 P50502
IPR001806	interpro	Small GTPase superfamily	6	0.685131	0.63404	Over	P11234 P20339 P08134 O95716 Q13637 O14966
IPR029055	interpro	Nucleophile aminohydrolases, N-terminal	2	0.702247	0.650403	Over	O94808 P28062
IPR003877	interpro	SPRY domain	2	0.709071	0.657781	Over	Q8WW59 Q1KMD3
cd00268	CDD	DEADc	2	0.709071	0.657781	Over	Q9NVP1 Q9NR30
IPR001841	interpro	Zinc finger, RING-type	4	0.709992	0.659165	Under	Q99942 Q6UWE0 Q96PM5 Q96T88
IPR002035	interpro	von Willebrand factor, type A	2	0.715761	0.665588	Over	P17301 O00339
IPR001870	interpro	B30.2/SPRY domain	2	0.715761	0.665588	Over	Q8WW59 Q1KMD3
IPR005225	interpro	Small GTP-binding protein domain	7	0.72236	0.672264	Over	P11234 P20339 P08134 O95716 Q13637 O14966 P18085
IPR036020	interpro	WW domain superfamily	2	0.722792	0.673743	Over	P46934 Q13526
IPR008984	interpro	SMAD/FHA domain superfamily	2	0.722792	0.673743	Over	P84022 Q99717
IPR001202	interpro	WW domain	2	0.749937	0.699605	Over	P46934 Q13526
IPR012337	interpro	Ribonuclease H-like superfamily	2	0.758862	0.708497	Over	Q9UKV8 Q9UIV1
IPR003591	interpro	Leucine-rich repeat, typical subtype	2	0.767218	0.717443	Over	O75093 Q6UWE0
IPR014014	interpro	RNA helicase, DEAD-box type, Q motif	2	0.767218	0.717443	Over	Q9NVP1 Q9NR30
IPR020568	interpro	Ribosomal protein S5 domain 2-type fold	1	0.769577	0.720223	Under	Q58FF6
IPR019787	interpro	Zinc finger, PHD-finger	1	0.771404	0.722508	Under	Q96T88
IPR009057	interpro	Homeobox-like domain superfamily	1	0.772764	0.724358	Under	Q99543
IPR003959	interpro	ATPase, AAA-type, core	1	0.774575	0.726633	Under	Q6PL18
IPR009060	interpro	UBA-like superfamily	1	0.776183	0.729299	Under	Q9H0E2
IPR029021	interpro	Protein-tyrosine phosphatase-like	1	0.776183	0.729299	Under	P28562
PF00096	Pfam	Zinc finger, C2H2 type	3	0.778783	0.732323	Over	P17026 Q9BWE0 Q92766
IPR016135	interpro	Ubiquitin-conjugating enzyme/RWD-like	3	0.781726	0.735674	Over	O14933 P49459 P63146
IPR000719	interpro	Protein kinase domain	13	0.807554	0.760582	Over	O15075 P30530 Q13308 P22694 P04049 Q99986 P46734 P49761 Q01973 P29317 P53350 P49759 P00533
cd02440	CDD	AdoMet_MTases	2	0.814606	0.767839	Under	Q9NVM4 Q9UNQ2
cd00046	CDD	DEXDc	2	0.814606	0.768439	Under	O95786 Q9NRZ9
IPR038765	interpro	Papain-like cysteine peptidase superfamily	4	0.822765	0.776749	Over	P07858 Q9UBR2 Q5VVQ6 Q96DC9
IPR035892	interpro	C2 domain superfamily	3	0.844047	0.798099	Under	P46934 Q9H0E2 Q15147
IPR029063	interpro	S-adenosyl-L-methionine-dependent methyltransferase	3	0.844047	0.798099	Under	Q9NVM4 P26358 Q9UNQ2
IPR036390	interpro	Winged helix DNA-binding domain superfamily	4	0.863655	0.817745	Under	P07305 Q92522 P10412 P16403
IPR036388	interpro	Winged helix-like DNA-binding domain superfamily	4	0.863655	0.817928	Under	P07305 Q92522 P10412 P16403
IPR008271	interpro	Serine/threonine-protein kinase, active site	8	1	1	Under	O15075 P22694 P04049 Q99986 P46734 P49761 P53350 P49759
IPR014756	interpro	Immunoglobulin E-set	2	1	1	Under	P52566 P61916
IPR039008	interpro	Intermediate filament, rod domain	1	1	1	Under	Q14533
IPR018039	interpro	Intermediate filament protein, conserved site	1	1	1	Under	Q14533
IPR001664	interpro	Intermediate filament protein	1	1	1	Under	Q14533
IPR017907	interpro	Zinc finger, RING-type, conserved site	2	1	1	Under	Q99942 Q96T88
IPR027417	interpro	P-loop containing nucleoside triphosphate hydrolase	28	1	1	Under	P11234 P28288 P08183 P20339 Q03518 Q86W25 Q92599 P32456 P08134 O95716 Q13637 Q03519 O95786 O14966 Q1KMD3 Q5K651 P43246 Q14807 Q9NVP1 O14678 Q13057 Q9BVP2 Q9NRZ9 P18085 Q8IVL1 Q9NR30 Q6PL18 O95235
IPR020849	interpro	Small GTPase superfamily, Ras-type	1	1	1	Under	P11234
IPR001781	interpro	Zinc finger, LIM-type	2	1	1	Under	O60711 P52943
IPR036465	interpro	von Willebrand factor A-like domain superfamily	2	1	1	Under	P17301 O00339
SFLDS00019	SFLD	Glutathione Transferase (cytosolic)	1	1	1	Over	O95833
IPR036249	interpro	Thioredoxin-like superfamily	4	1	1	Under	O95833 Q8TED1 P07203 P62341
IPR036282	interpro	Glutathione S-transferase, C-terminal domain superfamily	1	1	1	Under	O95833
IPR010987	interpro	Glutathione S-transferase, C-terminal-like	1	1	1	Under	O95833
IPR013785	interpro	Aldolase-type TIM barrel	1	1	1	Under	P54803
IPR000159	interpro	Ras-associating (RA) domain	1	1	1	Under	Q9Y4G8
IPR029071	interpro	Ubiquitin-like domain superfamily	6	1	1	Under	Q9Y4G8 O95166 Q5VVQ6 P04049 Q99933 Q96T88
IPR006594	interpro	LIS1 homology motif	1	1	1	Under	Q7Z3E5
IPR008942	interpro	ENTH/VHS	1	1	1	Under	O75674
IPR000961	interpro	AGC-kinase, C-terminal	1	1	1	Under	P22694
IPR035983	interpro	HECT, E3 ligase catalytic domain	1	1	1	Under	P46934
IPR000569	interpro	HECT domain	1	1	1	Under	P46934
IPR001683	interpro	Phox homologous domain	1	1	1	Under	Q96RF0
IPR036871	interpro	PX domain superfamily	1	1	1	Under	Q96RF0
IPR036188	interpro	FAD/NAD(P)-binding domain superfamily	2	1	1	Under	Q8NBM8 Q9Y2Z9
IPR029006	interpro	ADF-H/Gelsolin-like domain superfamily	1	1	1	Under	Q9Y281
IPR000306	interpro	FYVE zinc finger	1	1	1	Under	Q9BQS8
IPR017455	interpro	Zinc finger, FYVE-related	1	1	1	Under	Q9BQS8
IPR036872	interpro	CH domain superfamily	3	1	1	Under	Q9UI15 Q01995 Q8IVL1
IPR001715	interpro	Calponin homology domain	3	1	1	Under	Q9UI15 Q01995 Q8IVL1
IPR008979	interpro	Galactose-binding-like domain superfamily	2	1	1	Under	Q9UK22 P29317
IPR014001	interpro	Helicase superfamily 1/2, ATP-binding domain	4	1	1	Under	O95786 Q9NVP1 Q9NRZ9 Q9NR30
IPR001650	interpro	Helicase, C-terminal	4	1	1	Under	O95786 Q9NVP1 Q9NRZ9 Q9NR30
IPR011545	interpro	DEAD/DEAH box helicase domain	3	1	1	Under	O95786 Q9NVP1 Q9NR30
IPR036361	interpro	SAP domain superfamily	1	1	1	Under	Q1KMD3
IPR003034	interpro	SAP domain	1	1	1	Over	Q1KMD3
IPR000008	interpro	C2 domain	2	1	1	Under	Q9H0E2 Q15147
IPR013087	interpro	Zinc finger C2H2-type	4	1	1	Under	Q5VVQ6 P17026 Q9BWE0 Q92766
IPR001353	interpro	Proteasome, subunit alpha/beta	1	1	1	Under	P28062
IPR015424	interpro	Pyridoxal phosphate-dependent transferase	1	1	1	Under	Q9Y617
IPR015421	interpro	Pyridoxal phosphate-dependent transferase, major domain	1	1	1	Under	Q9Y617
IPR015422	interpro	Pyridoxal phosphate-dependent transferase domain 1	1	1	1	Under	Q9Y617
IPR002219	interpro	Protein kinase C-like, phorbol ester/diacylglycerol-binding domain	1	1	1	Under	P04049
IPR016130	interpro	Protein-tyrosine phosphatase, active site	1	1	1	Under	P28562
IPR003595	interpro	Protein-tyrosine phosphatase, catalytic	1	1	1	Under	P28562
IPR000387	interpro	Tyrosine specific protein phosphatases domain	1	1	1	Under	P28562
IPR036961	interpro	Kinesin motor domain superfamily	2	1	1	Under	Q14807 O95235
IPR000629	interpro	ATP-dependent RNA helicase DEAD-box, conserved site	1	1	1	Under	Q9NVP1
IPR036236	interpro	Zinc finger C2H2 superfamily	4	1	1	Under	P17026 O60870 Q9BWE0 Q92766
IPR036259	interpro	MFS transporter superfamily	1	1	1	Under	Q8NBI5
IPR023395	interpro	Mitochondrial carrier domain superfamily	1	1	1	Under	P12235
IPR018108	interpro	Mitochondrial substrate/solute carrier	1	1	1	Under	P12235
IPR001623	interpro	DnaJ domain	1	1	1	Under	Q99543
IPR001005	interpro	SANT/Myb domain	1	1	1	Under	Q99543
IPR036869	interpro	Chaperone J-domain superfamily	1	1	1	Under	Q99543
IPR017884	interpro	SANT domain	1	1	1	Under	Q99543
IPR000330	interpro	SNF2-related, N-terminal domain	1	1	1	Under	Q9NRZ9
IPR038718	interpro	SNF2-like, N-terminal domain superfamily	1	1	1	Under	Q9NRZ9
IPR015797	interpro	NUDIX hydrolase-like domain superfamily	1	1	1	Over	Q9NZJ9
IPR001163	interpro	LSM domain, eukaryotic/archaea-type	1	1	1	Over	O15116
IPR000626	interpro	Ubiquitin domain	2	1	1	Under	Q99933 Q96T88
IPR016021	interpro	MIF4G-like domain superfamily	1	1	1	Over	Q9Y6E2
IPR001487	interpro	Bromodomain	1	1	1	Under	Q6PL18
IPR036427	interpro	Bromodomain-like superfamily	1	1	1	Under	Q6PL18
IPR003960	interpro	ATPase, AAA-type, conserved site	1	1	1	Under	Q6PL18
IPR036612	interpro	K Homology domain, type 1 superfamily	1	1	1	Under	Q9UNW9
PS50084	ProSiteProfiles	Type-1 KH domain profile.	1	1	1	Under	Q9UNW9
IPR004087	interpro	K Homology domain	1	1	1	Under	Q9UNW9
IPR004088	interpro	K Homology domain, type 1	1	1	1	Under	Q9UNW9
cd00105	CDD	KH-I	1	1	1	Under	Q9UNW9
IPR036890	interpro	Histidine kinase/HSP90-like ATPase superfamily	1	1	1	Over	Q58FF6
